# Supplementary material
Source: PubMed Central journal article supplement (PMC9064041)

## Supplementary Information:

### Ultrapotent Inhibitor of *Clostridioides difficile* Growth, which Suppresses Recurrence *in vivo*

George A. Naclerio<sup>a†</sup>, Nader S. Abutaleb<sup>b†</sup>, Daoyi Li<sup>b</sup>, Mohamed N. Seleem<sup>b,c,d\*</sup>, and Herman O. Sintim<sup>a,d\*</sup>

<sup>a</sup> Chemistry Department, Institute for Drug Discovery, Purdue University, West Lafayette, IN 47907, United States

<sup>b</sup> Department of Comparative Pathobiology, Purdue University College of Veterinary Medicine, West Lafayette, Indiana 47907, United States

<sup>c</sup> Department of Biomedical Sciences and Pathobiology, Virginia-Maryland College of Veterinary Medicine, Virginia Polytechnic Institute and State University, Blacksburg, VA, 24060, United States

<sup>d</sup> Purdue Institute of Inflammation, Immunology, and Infectious Disease, West Lafayette, Indiana 47907, United States

I. Bacterial Strains Used in Study

II. <sup>1</sup>H, <sup>13</sup>C, and <sup>19</sup>F Spectra of Analogs

III. HPLC Traces of Compounds **1-17**

**I. Table 1S. Bacterial strains used in this study.**

| <b>Bacterial Strains</b>                             | <b>Source/Description</b>                                                                                                      |
|------------------------------------------------------|--------------------------------------------------------------------------------------------------------------------------------|
| <i>C. difficile</i> ATCC BAA-1801 (3232)             | Human feces of an adult in Belgium.<br>Non-toxigenic, Ribotype 010.                                                            |
| <i>C. difficile</i> NR-13432 (Isolate 6)             | Human patient in USA, 2008/2009.                                                                                               |
| <i>C. difficile</i> NR-13435 (Isolate 9)             | Human patient in USA, 2008/2009.                                                                                               |
| <i>C. difficile</i> P2 (NR-32883)                    | Human patient in Western Pennsylvania, USA, 2001.<br>Toxigenic                                                                 |
| <i>C. difficile</i> P13 (NR-32891)                   | Human patient in Western Pennsylvania, USA, 2005.<br>Toxigenic                                                                 |
| <i>C. difficile</i> P19 (NR-32895)                   | Human patient in Western Pennsylvania, USA, 2005.<br>Toxigenic                                                                 |
| <i>C. difficile</i> P30 (NR-32904)                   | Asymptomatic human patient in Western Pennsylvania, USA, 2009.<br>Non-toxigenic                                                |
| <i>C. difficile</i> ATCC 43255 (VPI 10463)           | An abdominal wound.<br>Ribotype 087, <i>tcdA<sup>a</sup></i> and <i>tcdB<sup>b</sup></i> genes                                 |
| <i>Lactobacillus gasseri</i> HM-400 (EX336960VC03)   | From a human mid-vaginal wall in March 2010 in Richmond, Virginia.<br>Reference genome for the Human Microbiome Project (HMP). |
| <i>Lactobacillus crispatus</i> HM-103 (JV-V01)       | From normal human vaginal flora.<br>Reference genome for the Human Microbiome Project (HMP).                                   |
| <i>Lactobacillus crispatus</i> HM-371 (EX849587VC02) | The mid-vaginal wall of a human patient, Virginia, March 2010<br>Reference genome for the Human Microbiome Project (HMP).      |
| <i>Bacteroides fragilis</i> HM-711 (CL05T00C42)      | Healthy adult human feces, Massachusetts, USA.<br>Reference genome for the Human Microbiome Project (HMP).                     |
| <i>Bacteroides fragilis</i> HM-709 (CL07T00C01)      | Healthy adult human feces, Massachusetts, USA.<br>Reference genome for the Human Microbiome Project (HMP).                     |
| <i>Bacteroides dorei</i> HM-719 (CL02T12C06)         | Healthy adult human feces, Massachusetts, USA.<br>Reference genome for the Human Microbiome Project (HMP).                     |

<sup>a</sup>*tcdA*, toxin A gene; <sup>b</sup>*tcdB*, toxin B gene

## II. $^1\text{H}$ , $^{13}\text{C}$ , and $^{19}\text{F}$ NMR Spectra of Analogs:

GN-281.1.fid  
H1 standard parameters, cryoprobe prodigy.

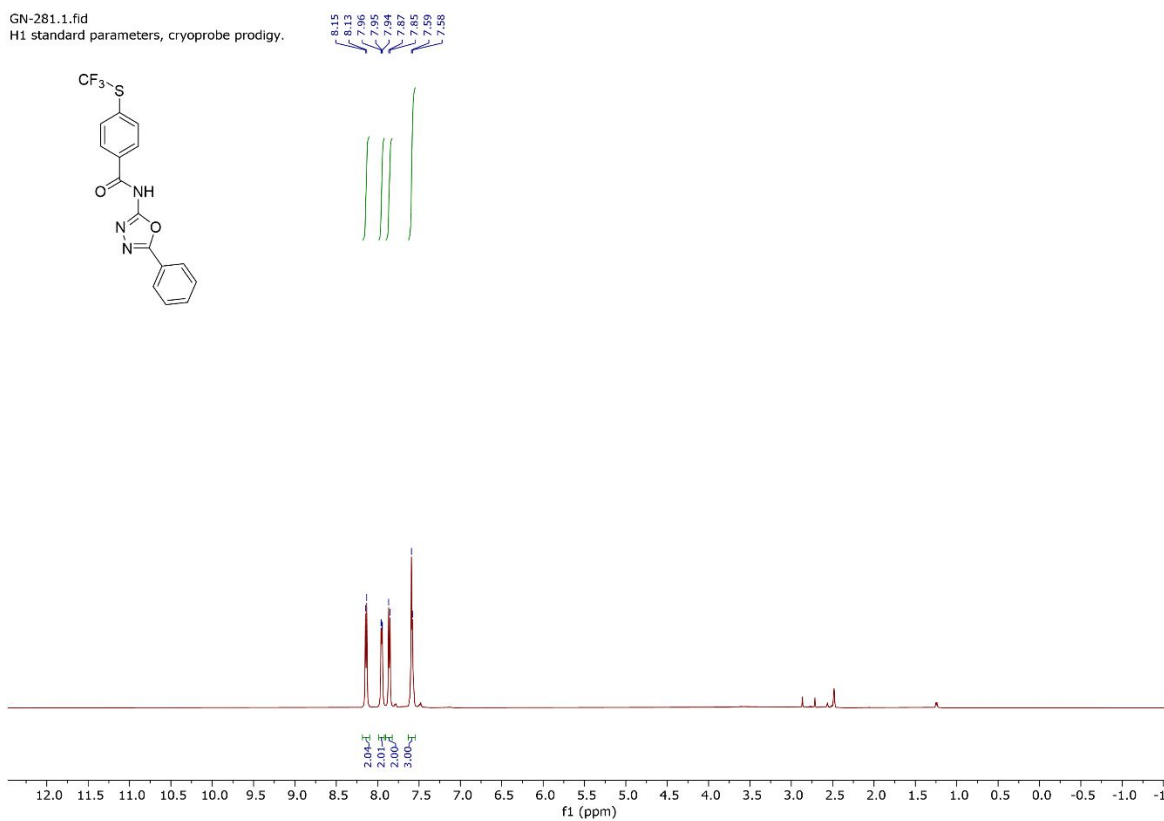

GN-281.1.fid  
H1 standard parameters, cryoprobe prodigy.

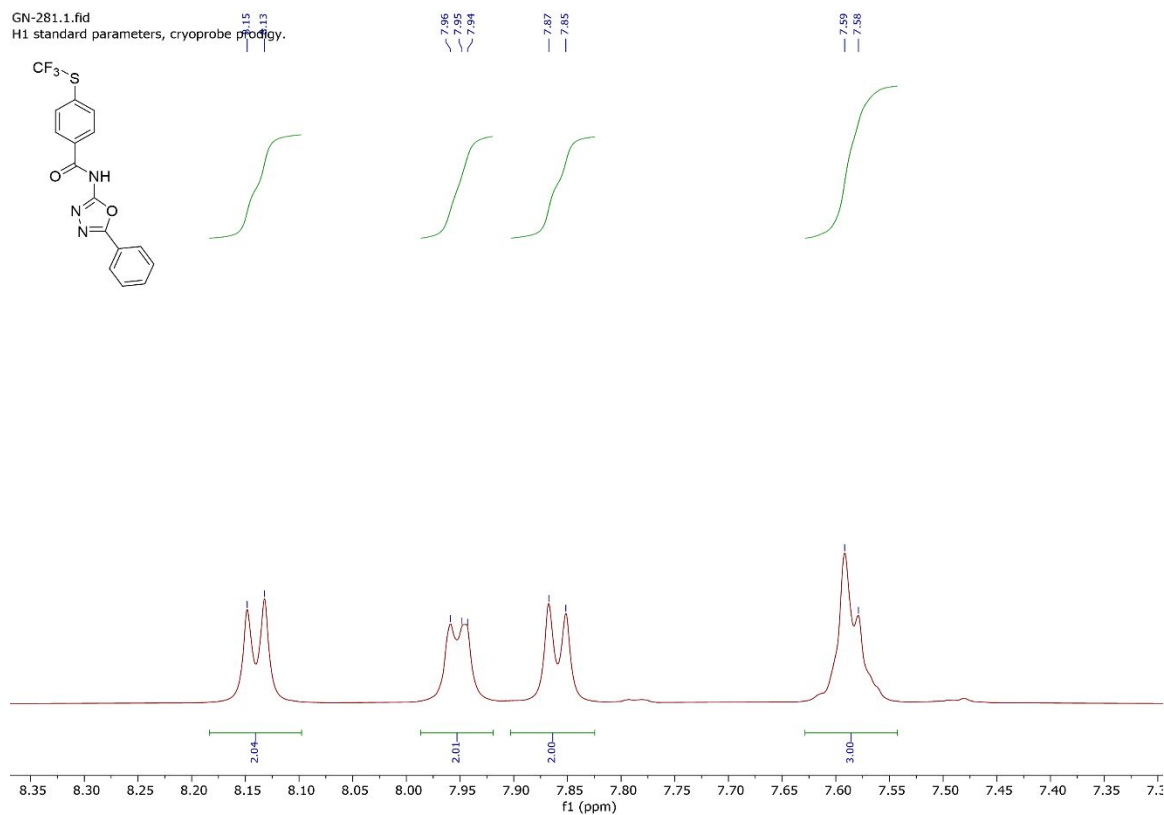

GN-281.2.fid  
 C13 standard parameters, cryoprobe prodigy. PULPROG = zgpg30

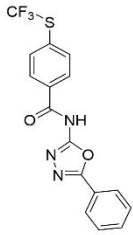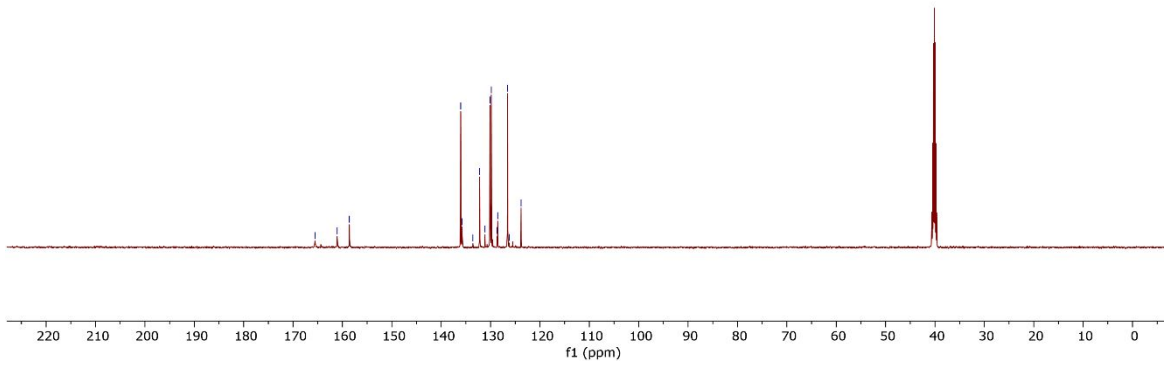

GN-281.3.fid  
 F19 standard parameters, cryoprobe prodigy.  
 DE is lengthened compared to default.

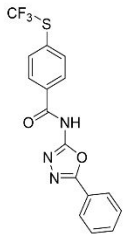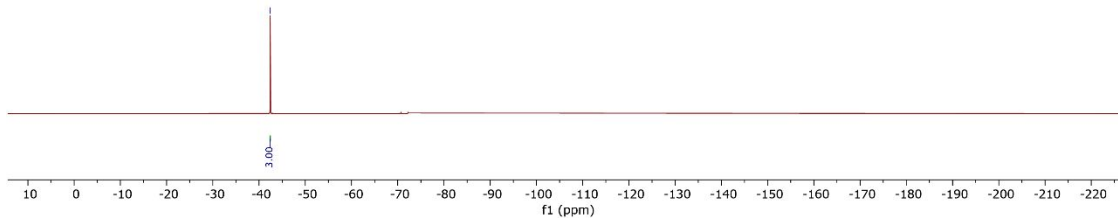

GN-2115.1.fid  
H1 standard parameters, cryoprobe prodigy

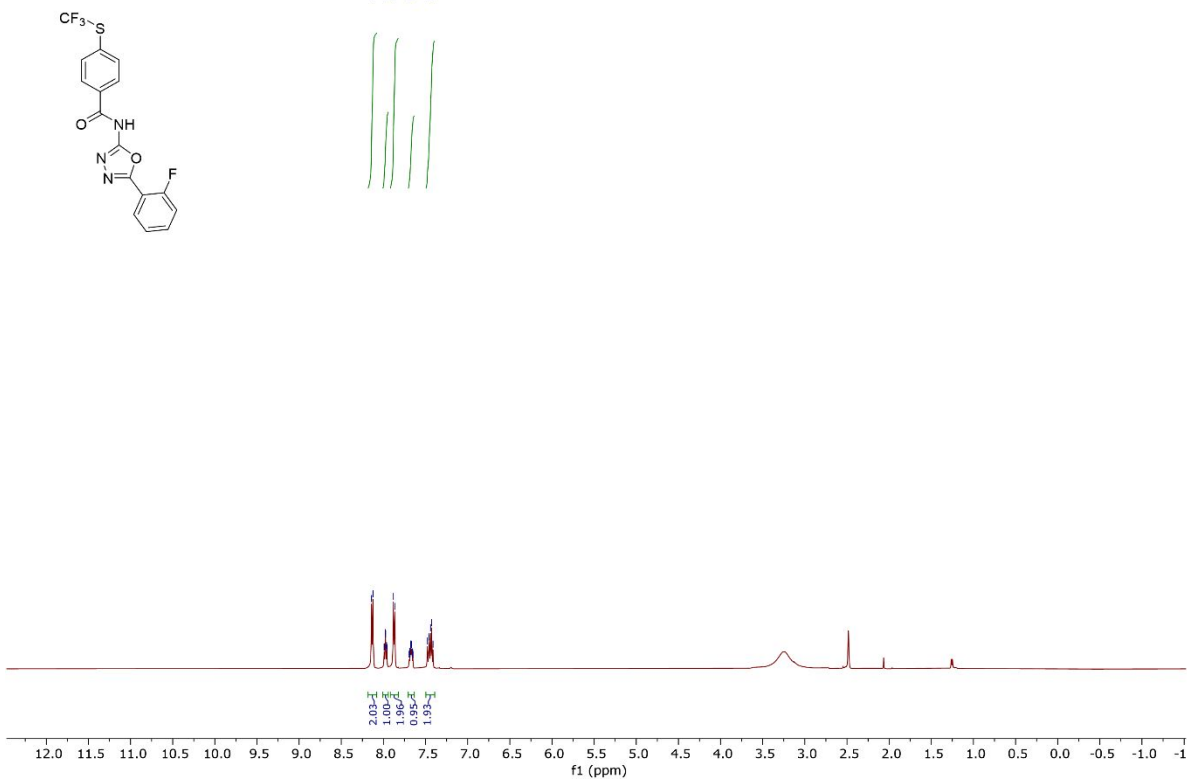

GN-2115.1.fid  
H1 standard parameters, cryoprobe prodigy.

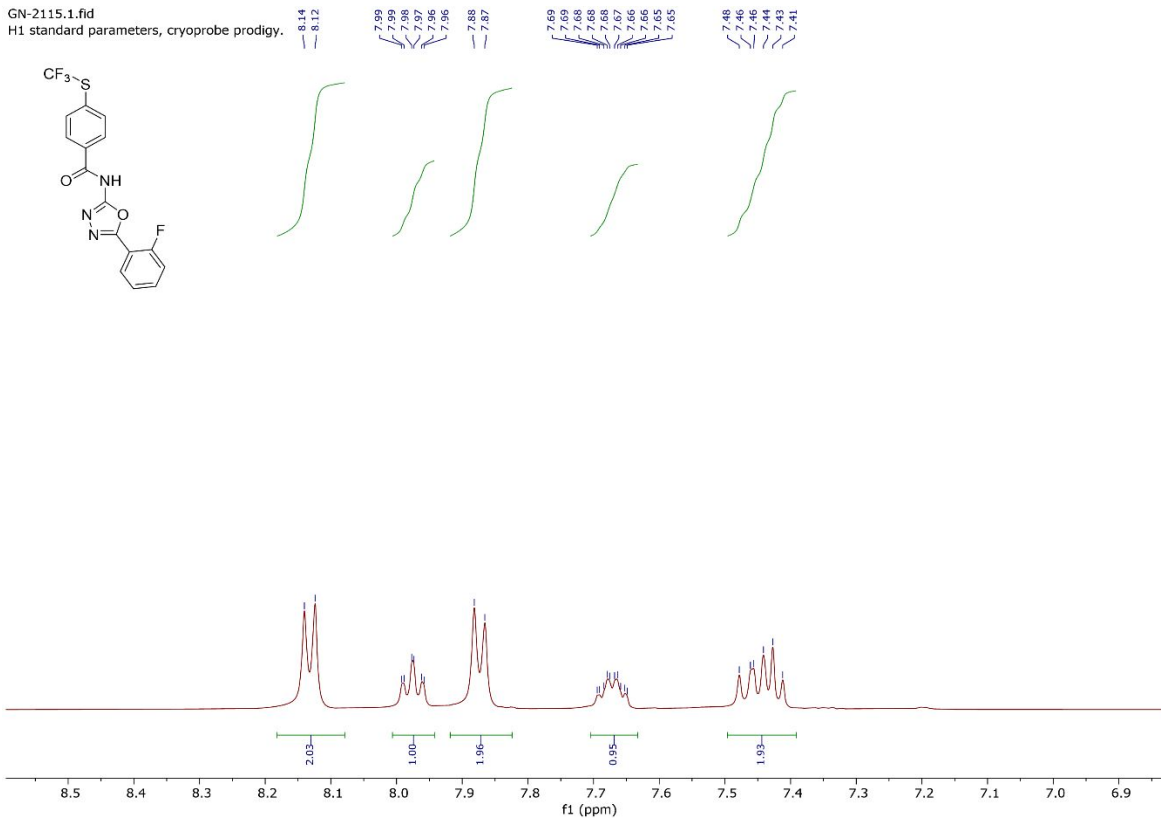

GN-2115.2.fid  
C13 standard parameters, cryoprobe prodigy.

157.57, 157.95, 158.62, 158.61, 137.70, 137.08, 134.67, 134.47, 134.40, 131.14, 130.13, 129.74, 128.61, 117.62, 117.46, 112.21, 112.12

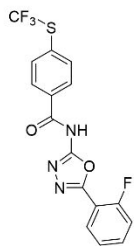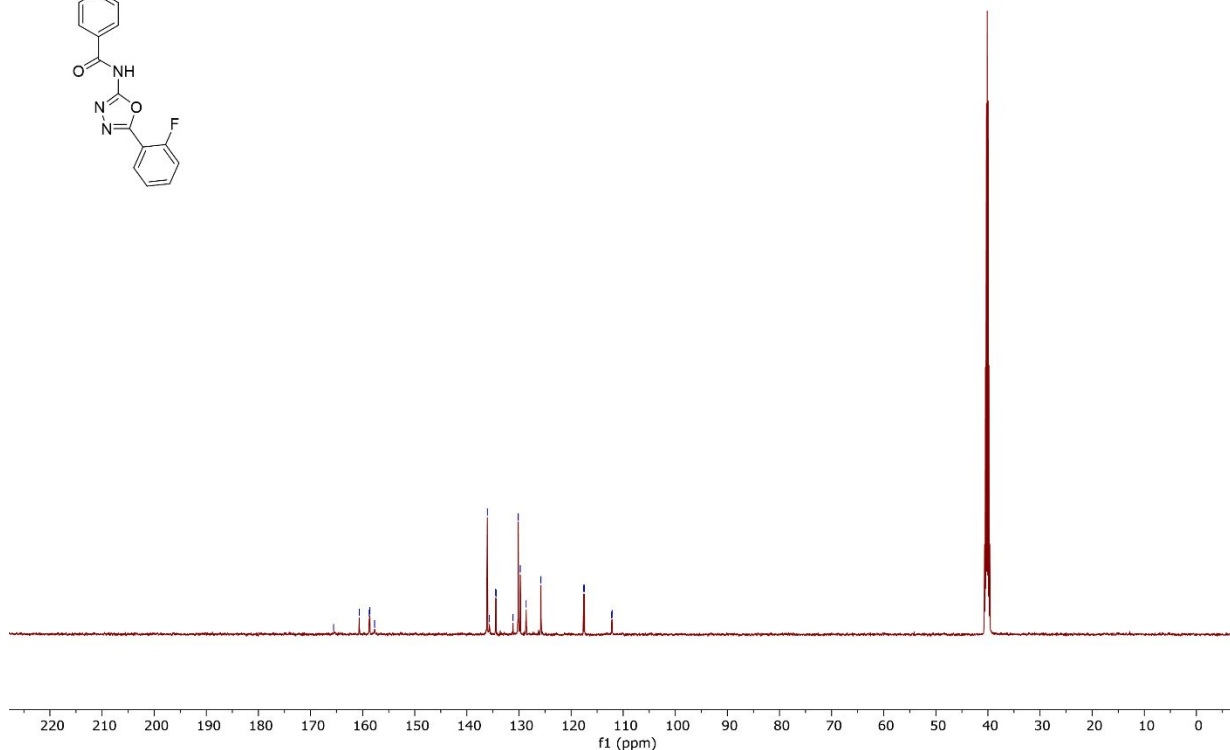

GN-2115.3.fid  
F19 standard parameters, cryoprobe prodigy.  
DE is lengthened compared to default.

-111.99, -112.00

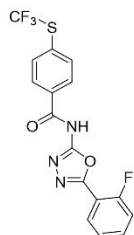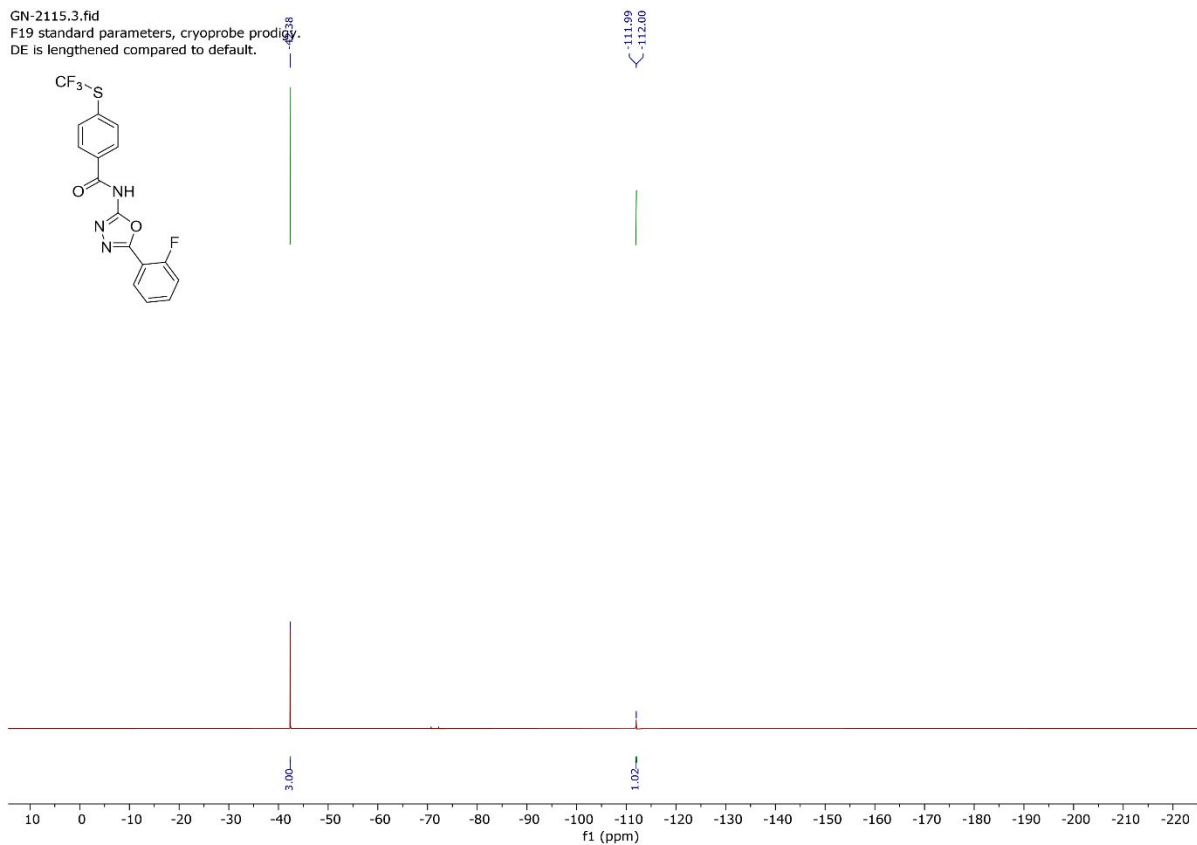

GN-2114.1.fid  
H1 standard parameters, cryoprobe prodigy

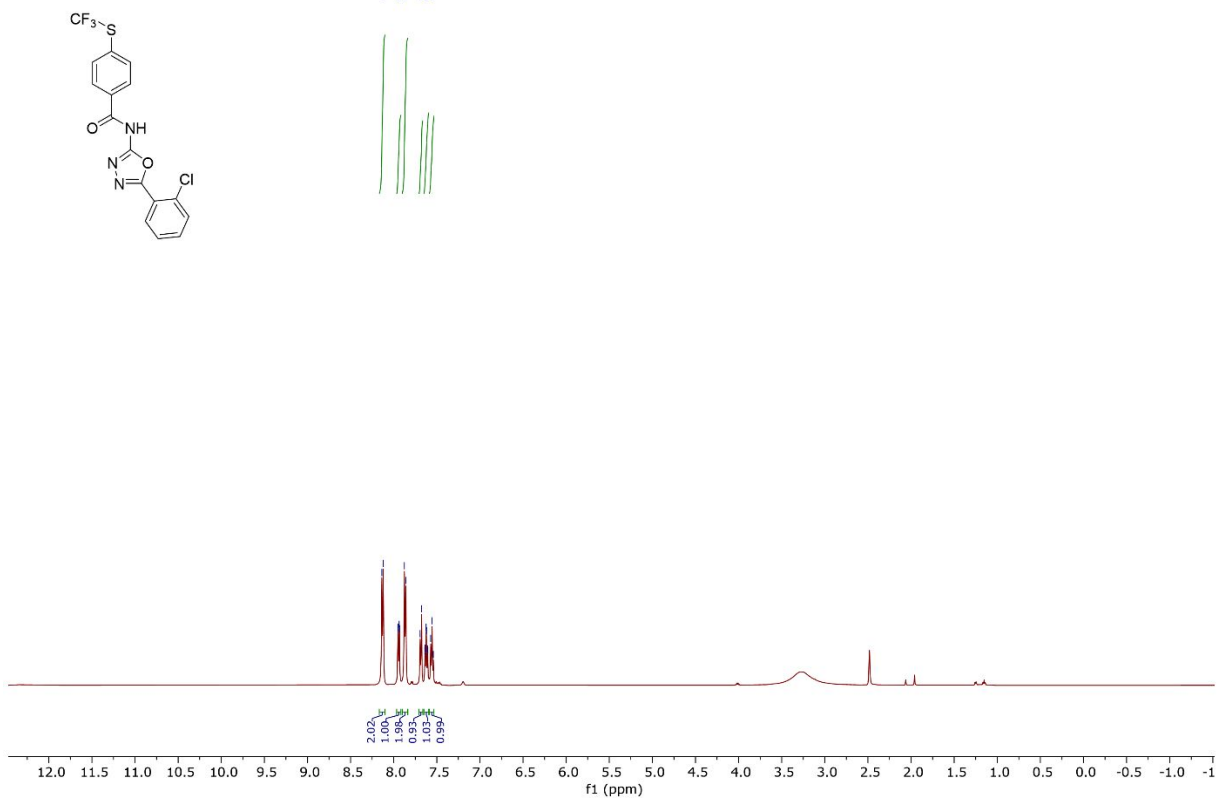

GN-2114.1.fid  
H1 standard parameters, cryoprobe prodigy

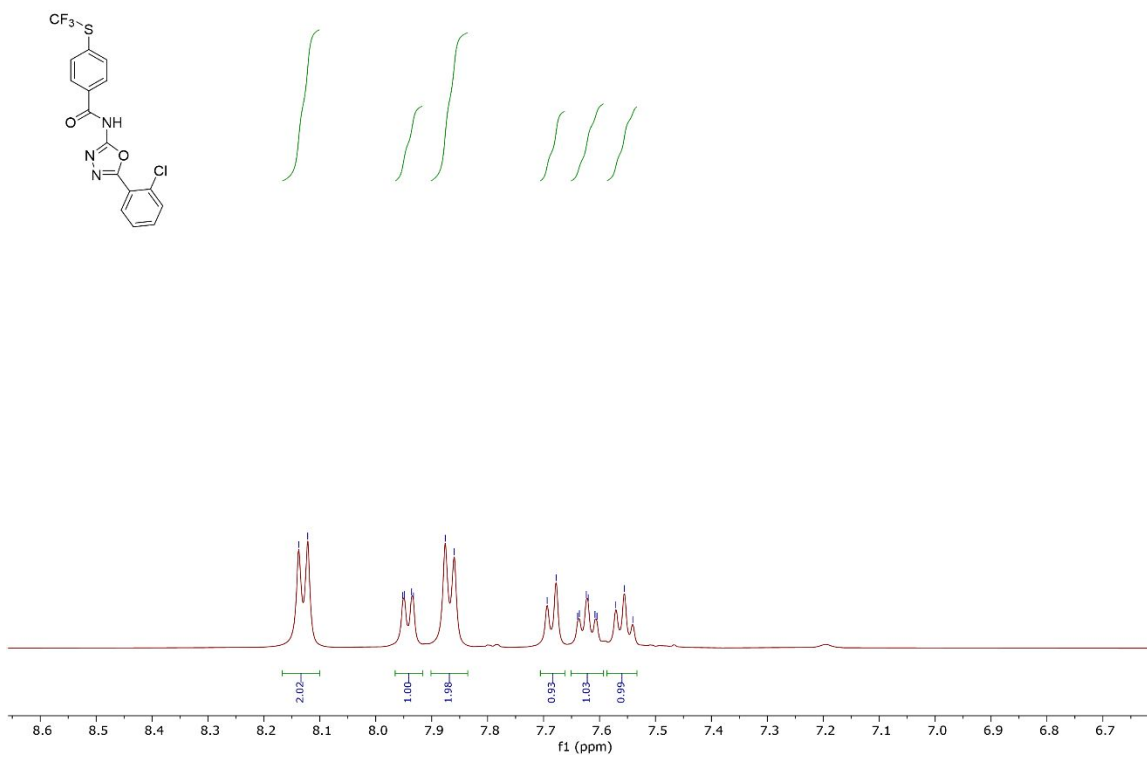

GN-2114.2.fid

C13 standard parameters, cryoprobe prodigy.

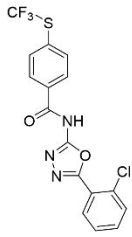

162.20  
133.22  
131.77  
133.06  
131.56  
133.50  
132.25  
131.56  
131.56  
131.13  
130.13  
128.66  
128.29  
123.02

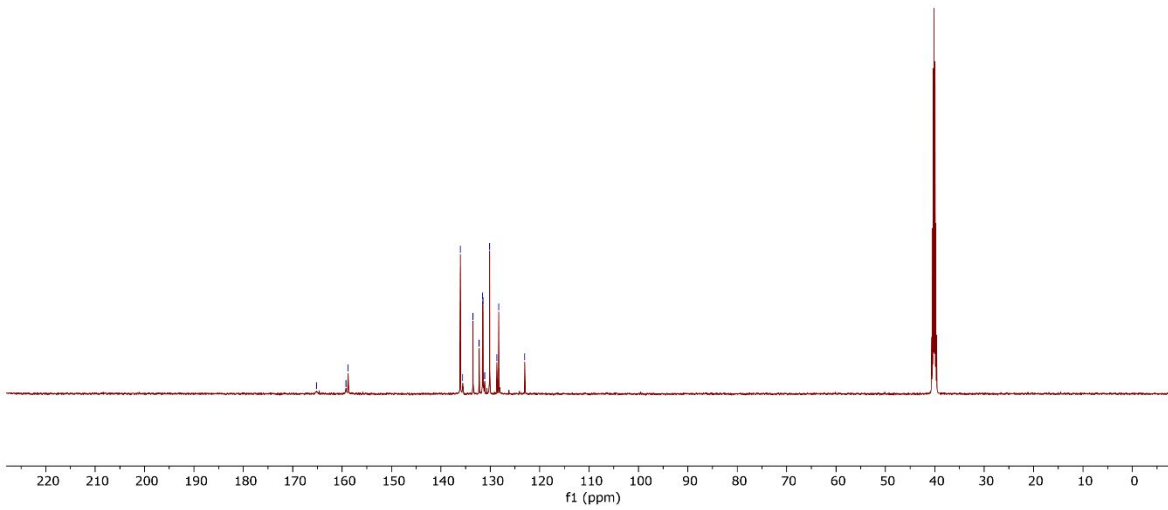

GN-2114.3.fid

F19 standard parameters, cryoprobe prodigy.  
DE is lengthened compared to default.

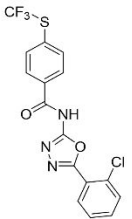

162.20

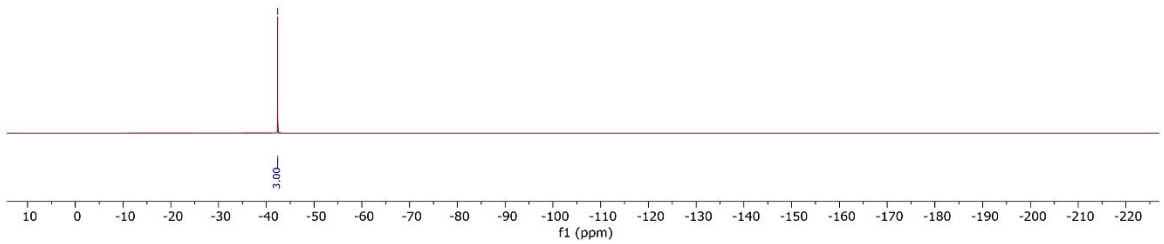



GN-205.1.fid  
 H1 standard parameters, cryoprobe prodigy

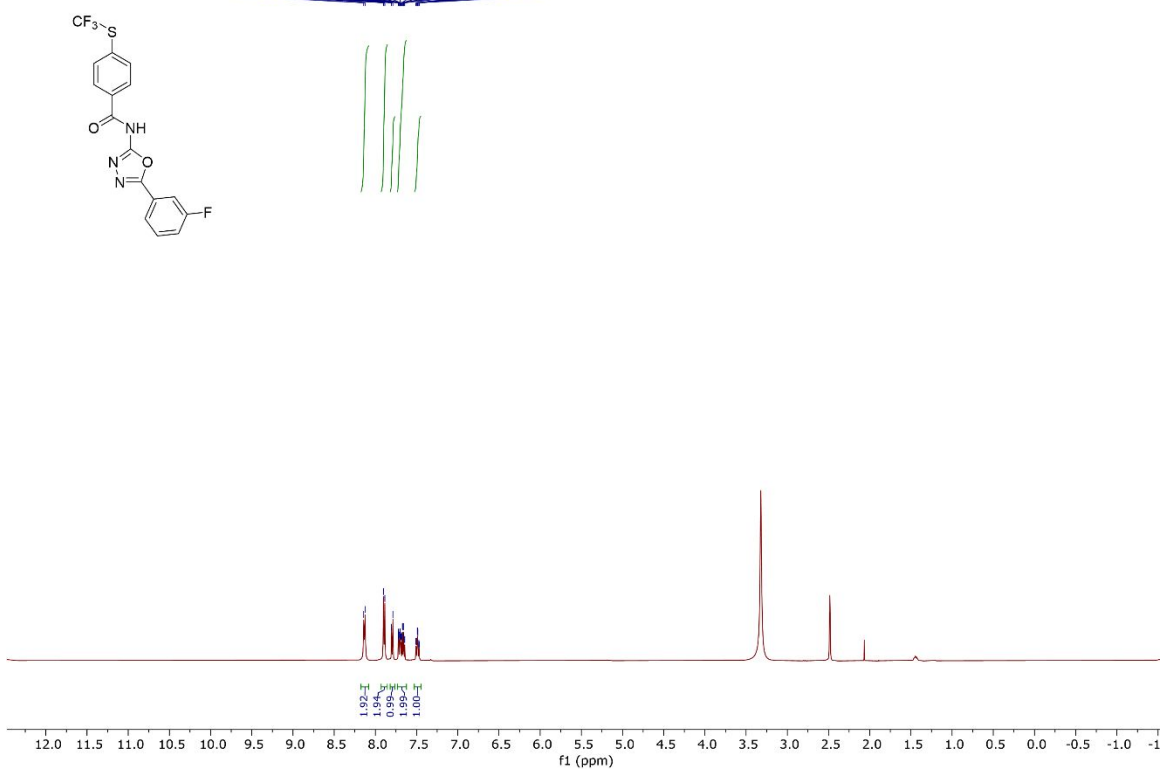

GN-205.1.fid  
 H1 standard parameters, cryoprobe prodigy.

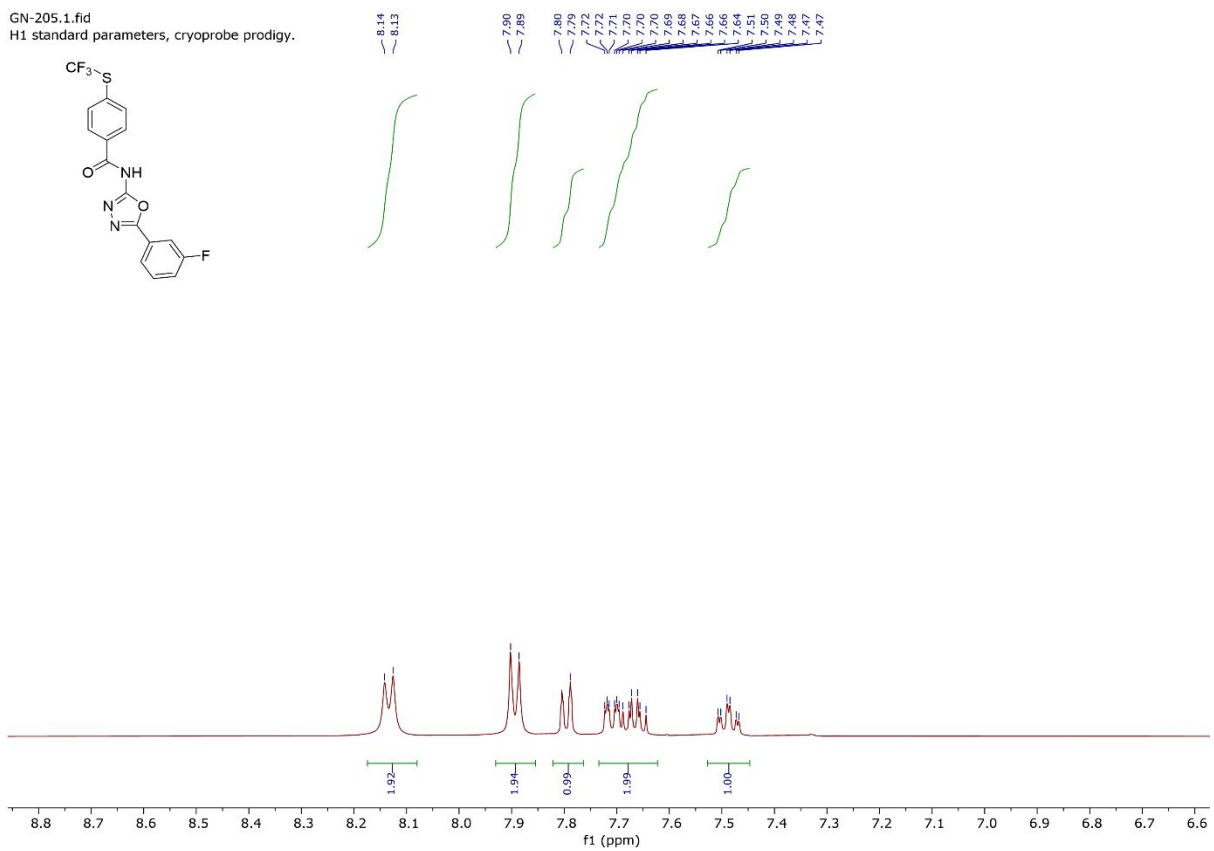

GN-205.2.fid  
C13 standard parameters, cryoprobe prodigy.

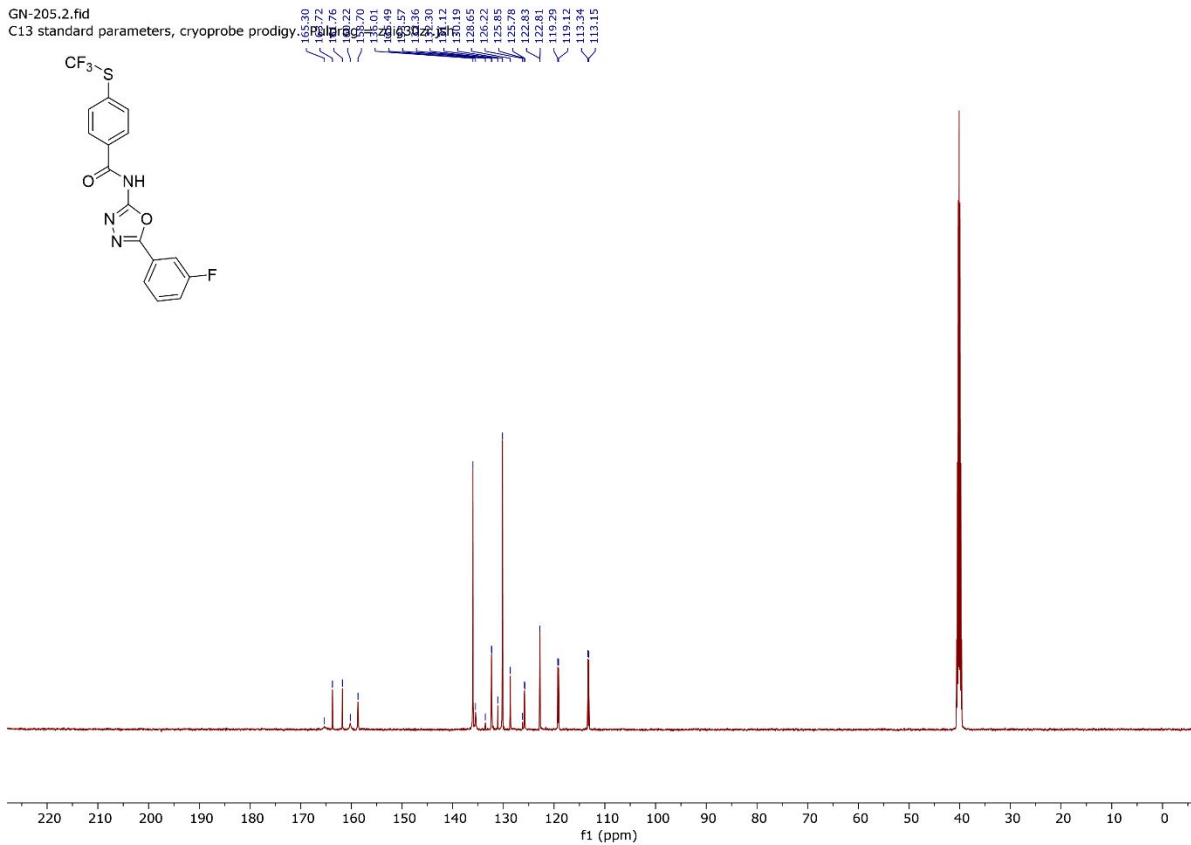

GN-205.3.fid  
F19 standard parameters, cryoprobe prodigy.  
DE is lengthened compared to default.

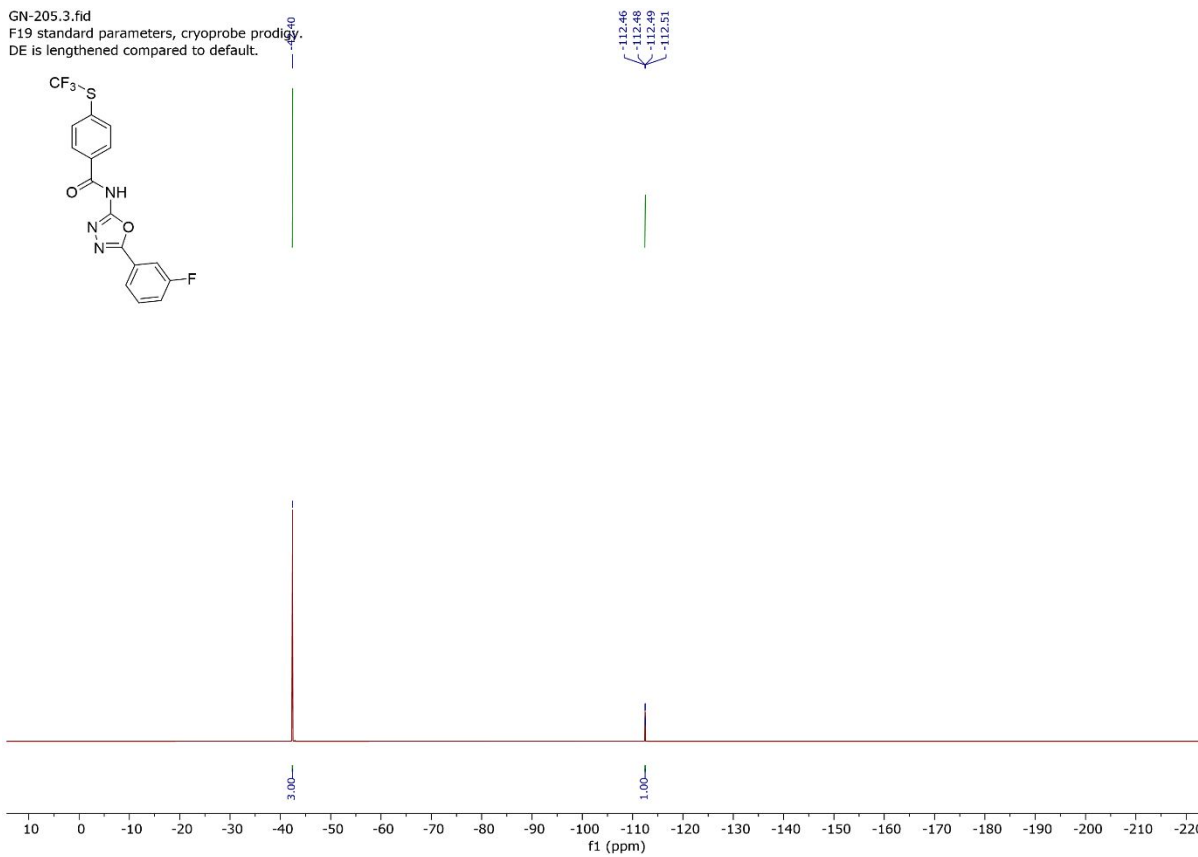

GN-204.1.fid  
H1 standard parameters, cryoprobe prodigy.

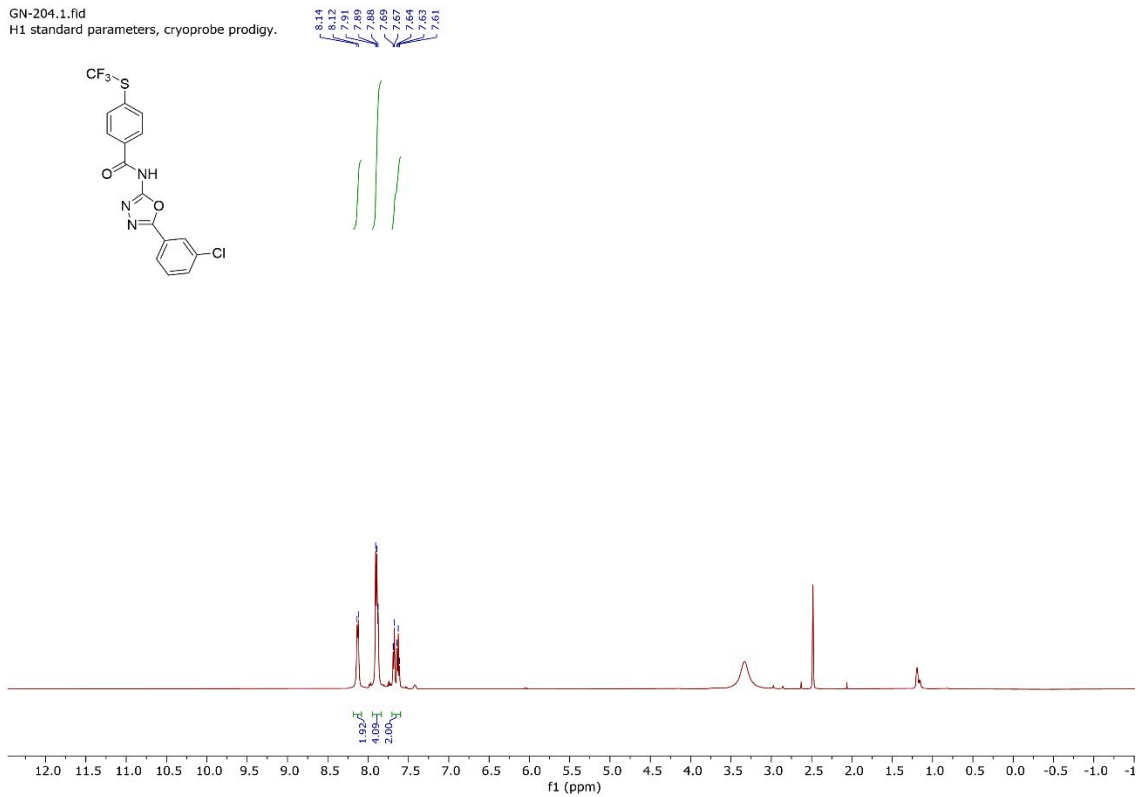

GN-204.1.fid  
H1 standard parameters, cryoprobe prodigy.

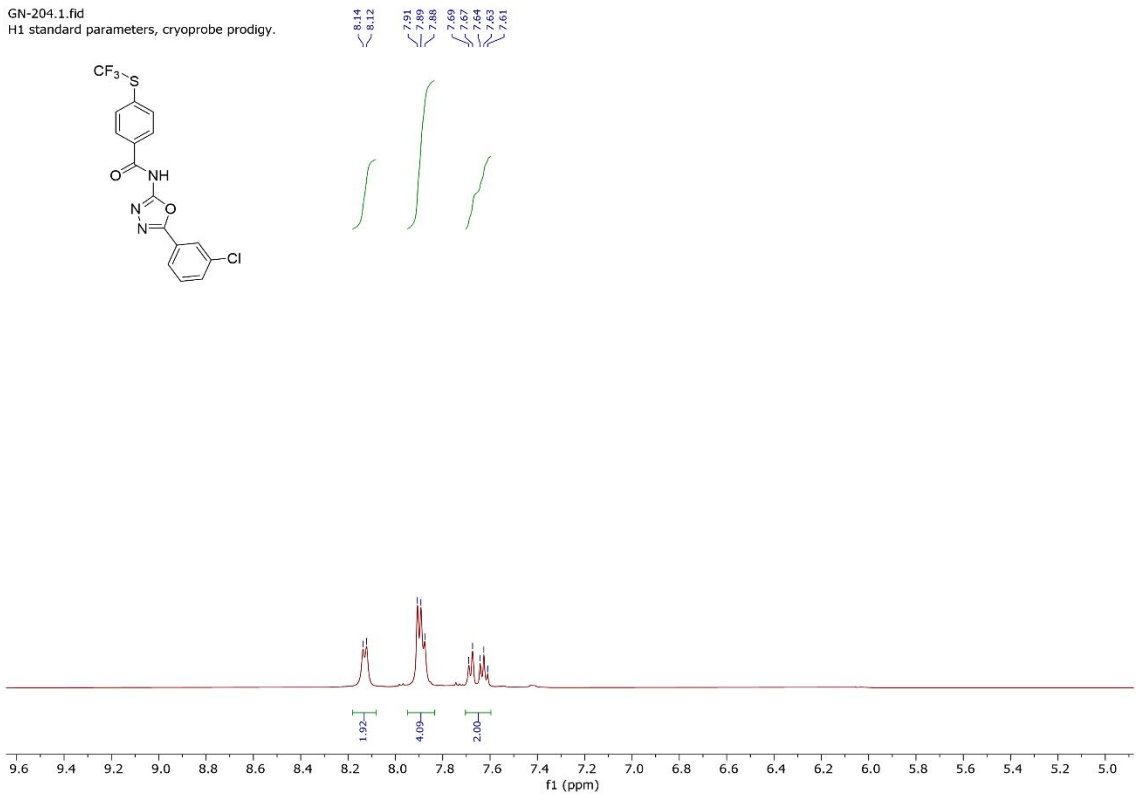

GN-204.2.fid  
C13 standard parameters, cryoprobe prodigy.

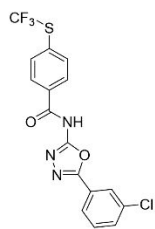

162.39  
159.84  
131.10  
130.59  
132.00  
132.00  
131.14  
131.14  
130.18  
128.89  
128.69  
128.69  
126.05  
125.84  
125.22

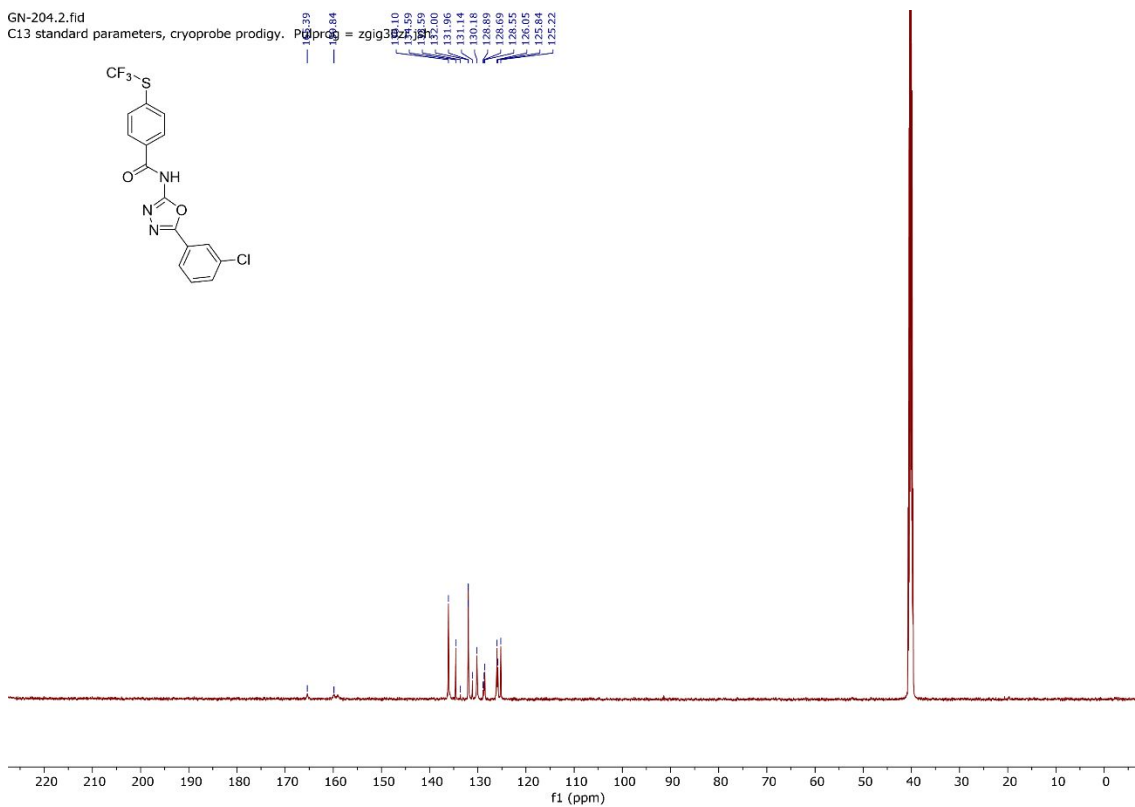

GN-204.3.fid  
F19 standard parameters, cryoprobe prodigy.  
DE is lengthened compared to default.

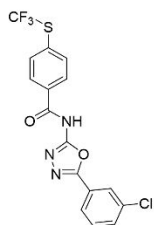

39.236

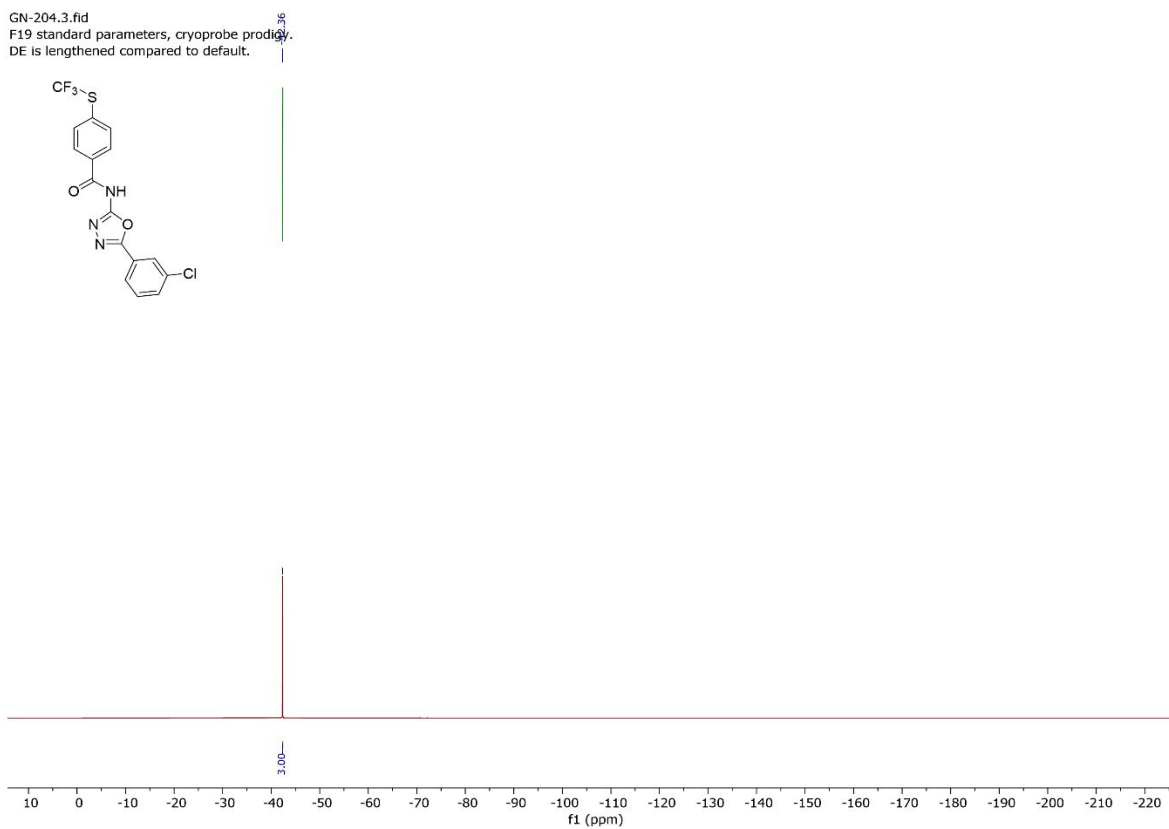

GN-278.1.fid  
H1 standard parameters, cryoprobe prodigy.

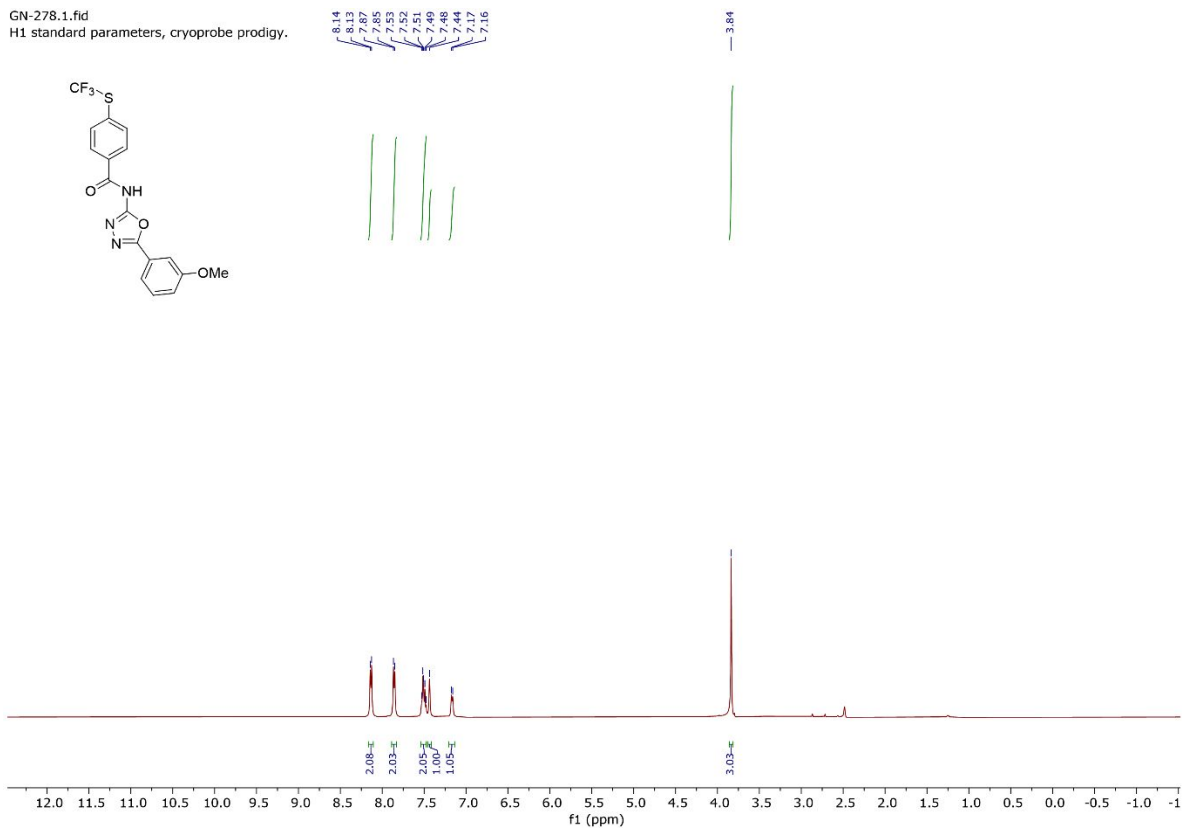

GN-278.1.fid  
H1 standard parameters, cryoprobe prodigy.

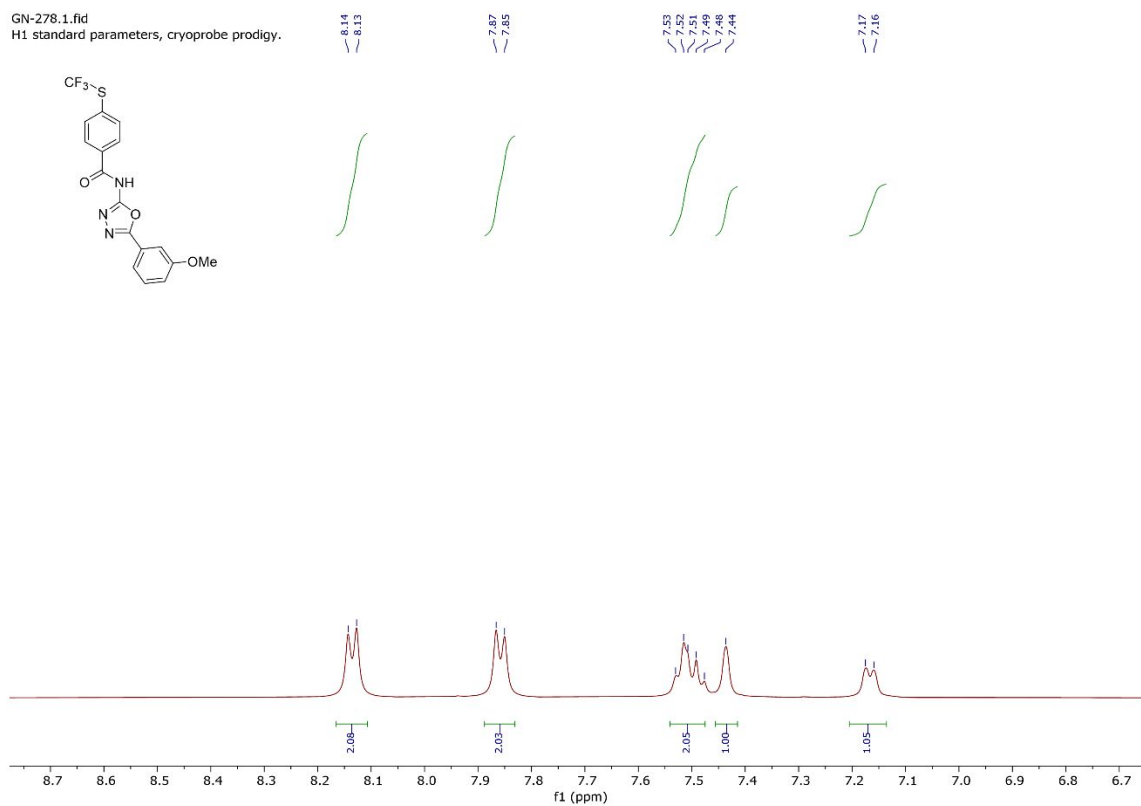

GN-278.1.fid  
H1 standard parameters, cryoprobe prodigy.

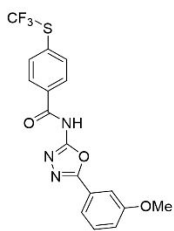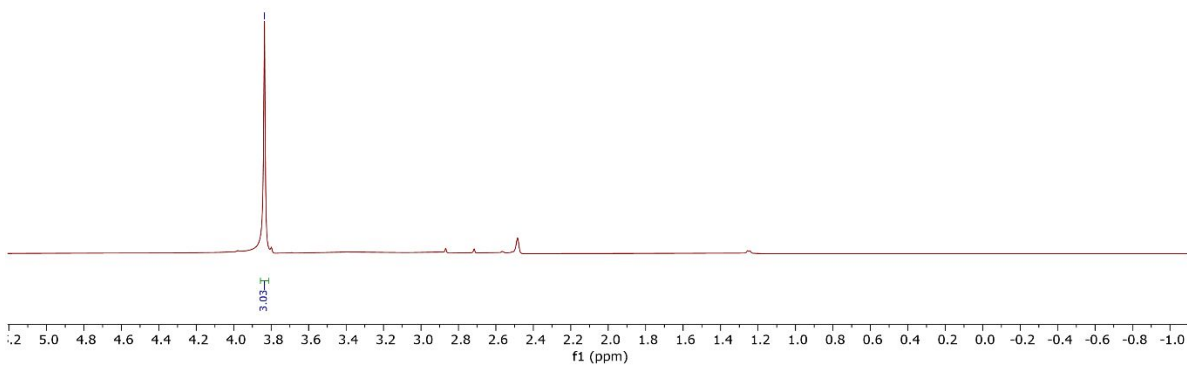

GN-278.2.fid  
C13 standard parameters, cryoprobe prodigy.

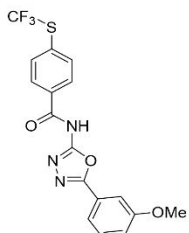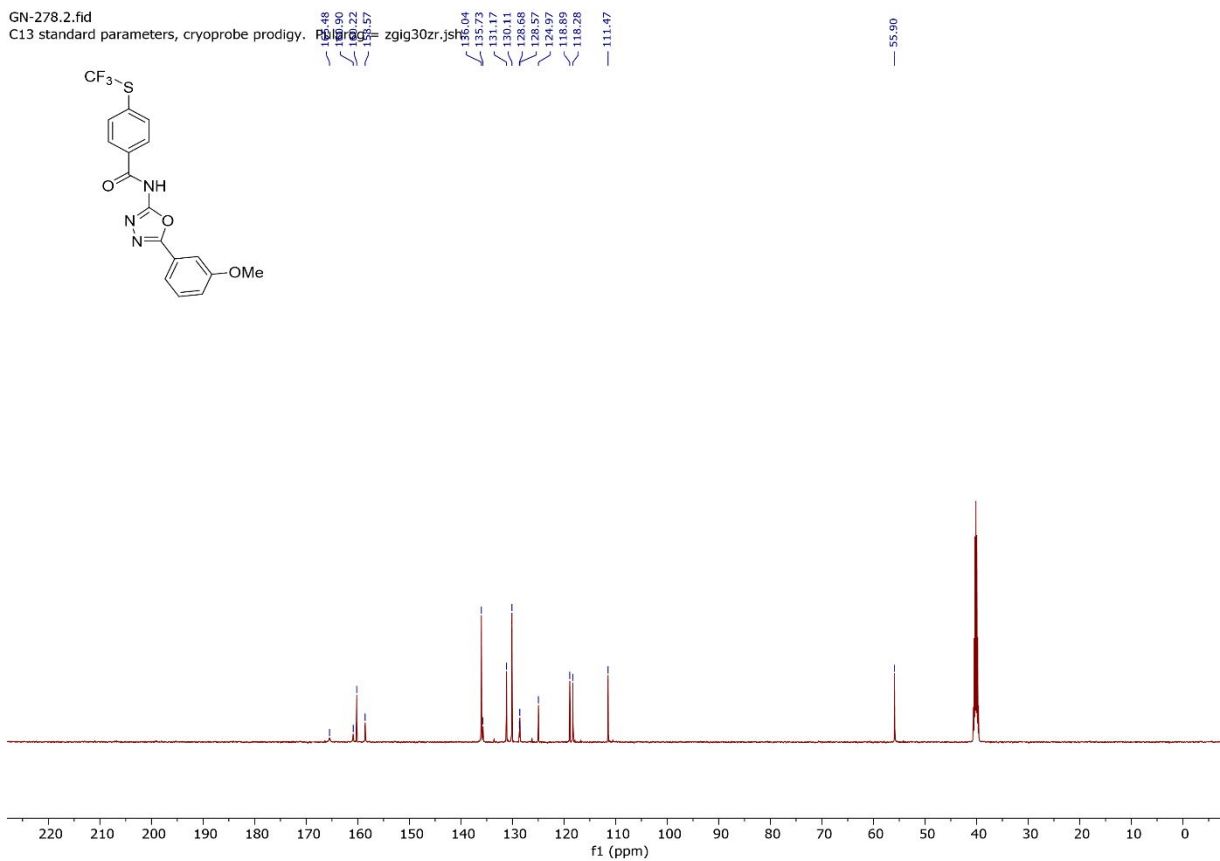

GN-278.3.fid  
F19 standard parameters, cryoprobe prodigy.  
DE is lengthened compared to default.

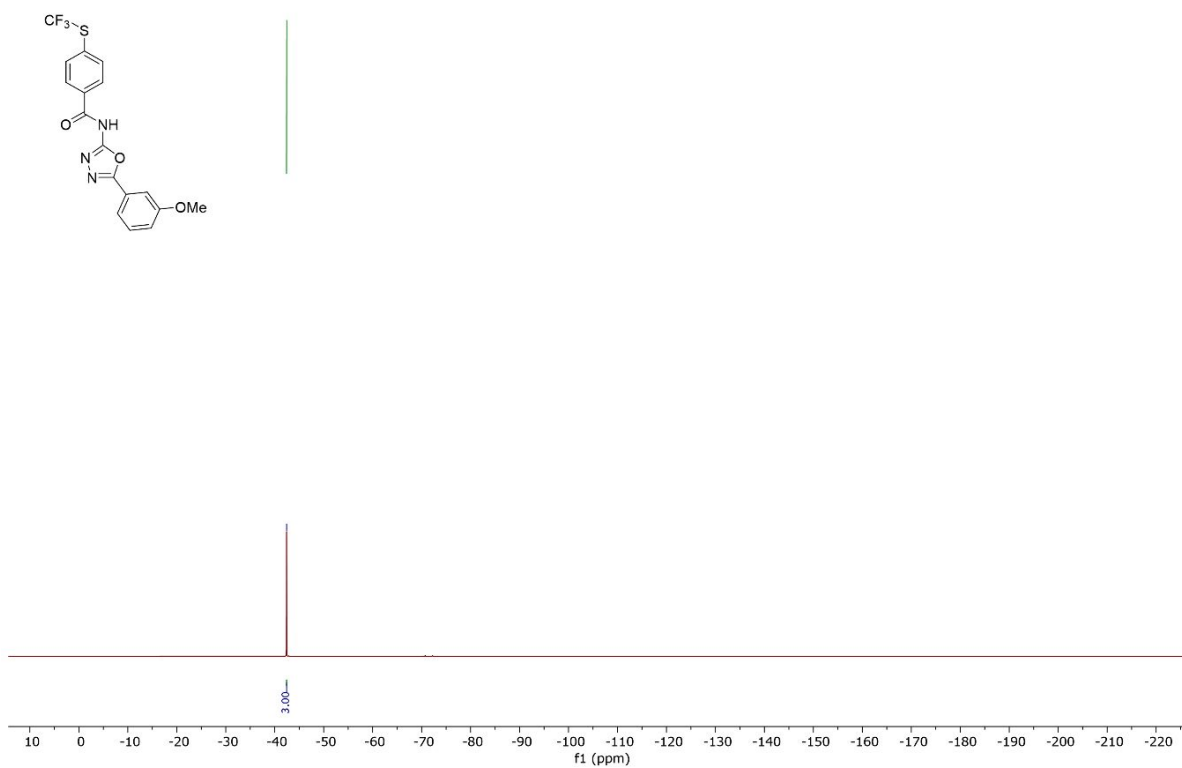

GN-253.1.fid  
H1 standard parameters, cryoprobe prodigy.

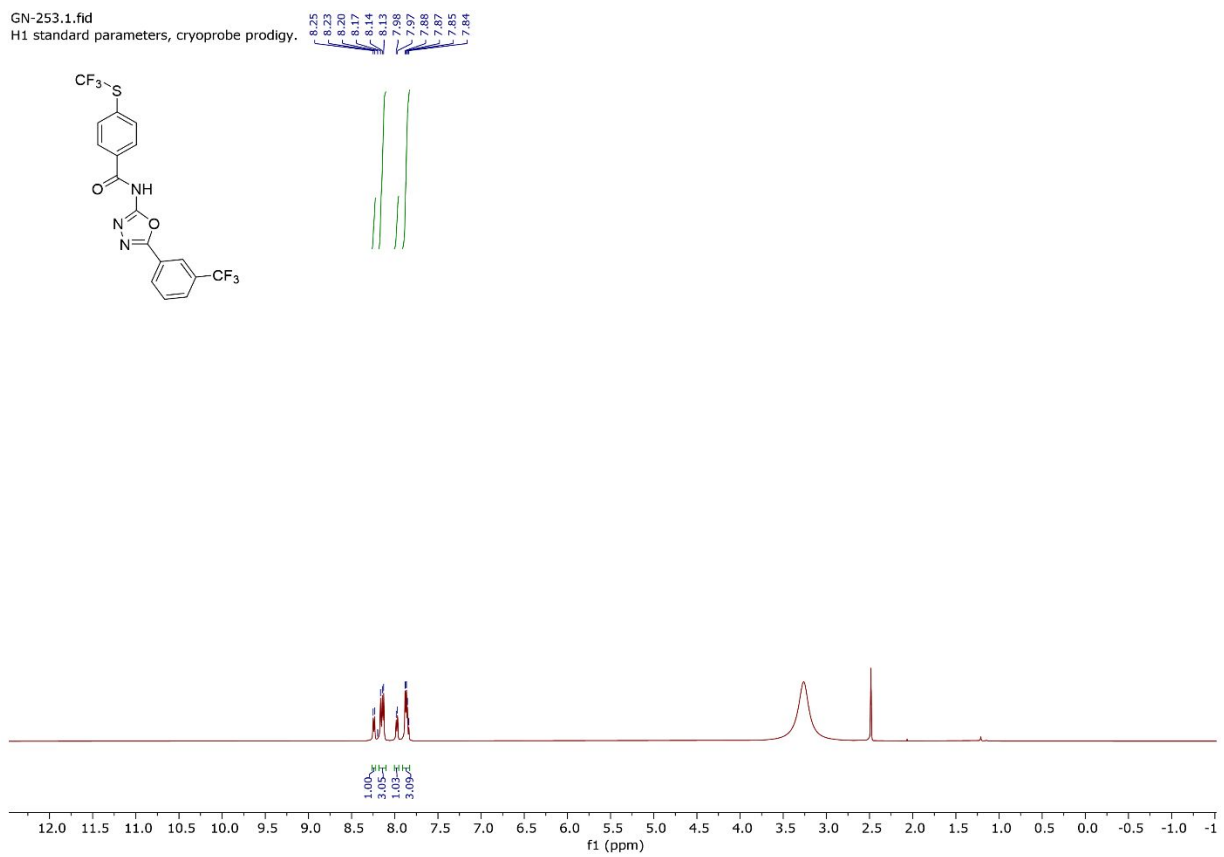

GN-253.1.fid  
H1 standard parameters, cryoprobe prodigy.

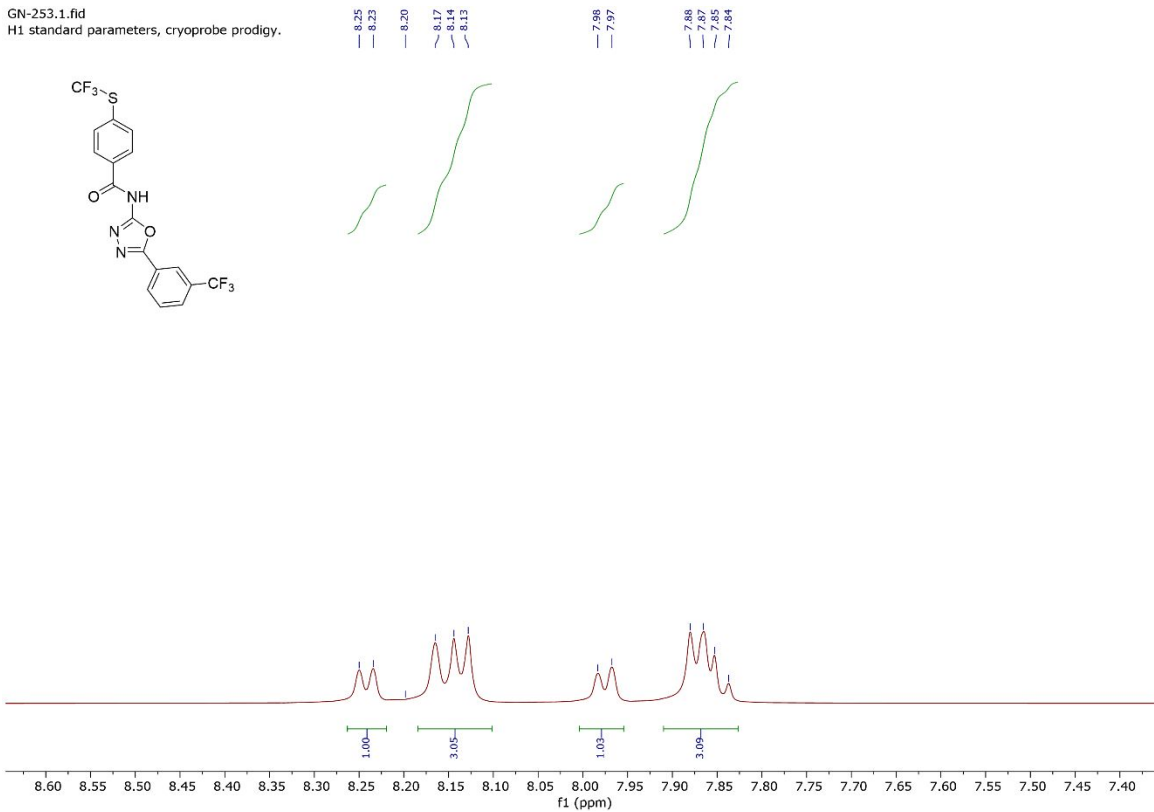

GN-253.2.fid  
C13 standard parameters, cryoprobe prodigy.

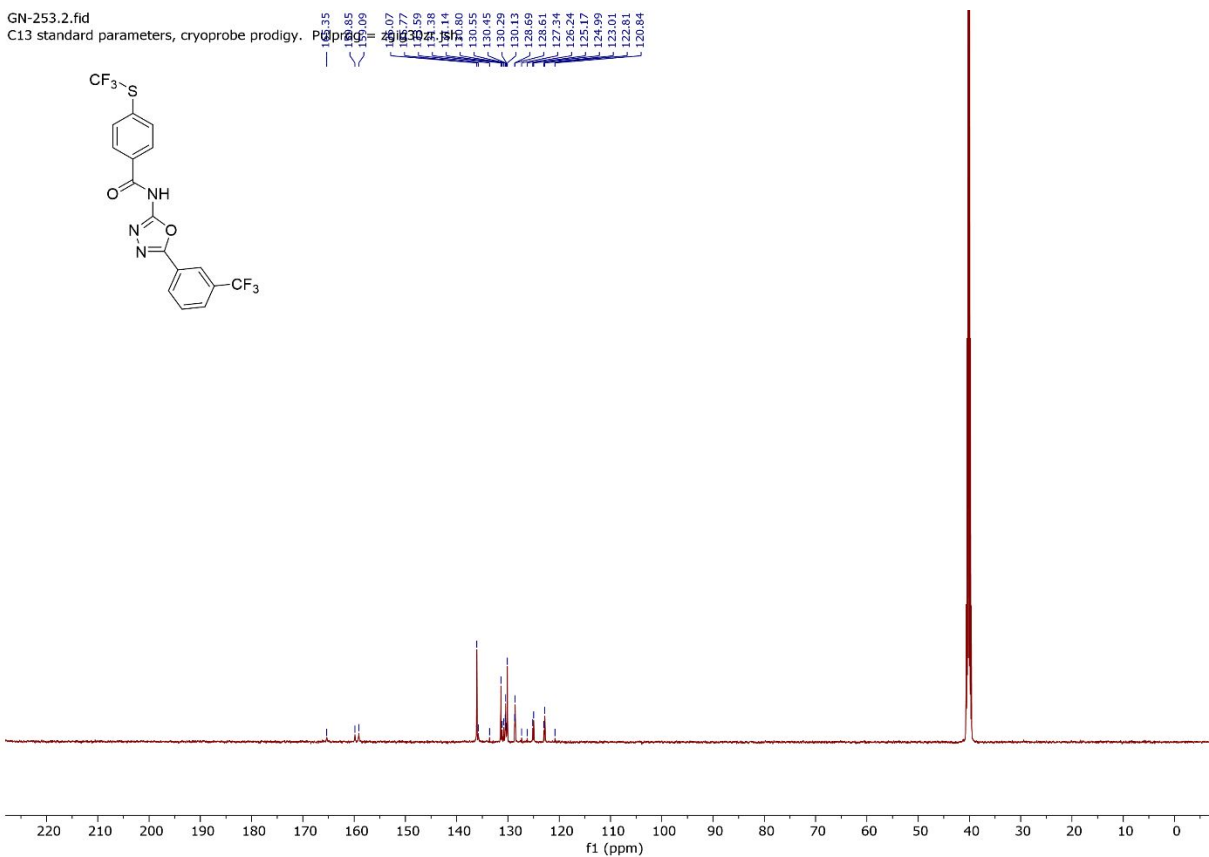



GN-253.3.fid  
F19 standard parameters, cryoprobe prodigy.  
DE is lengthened compared to default.

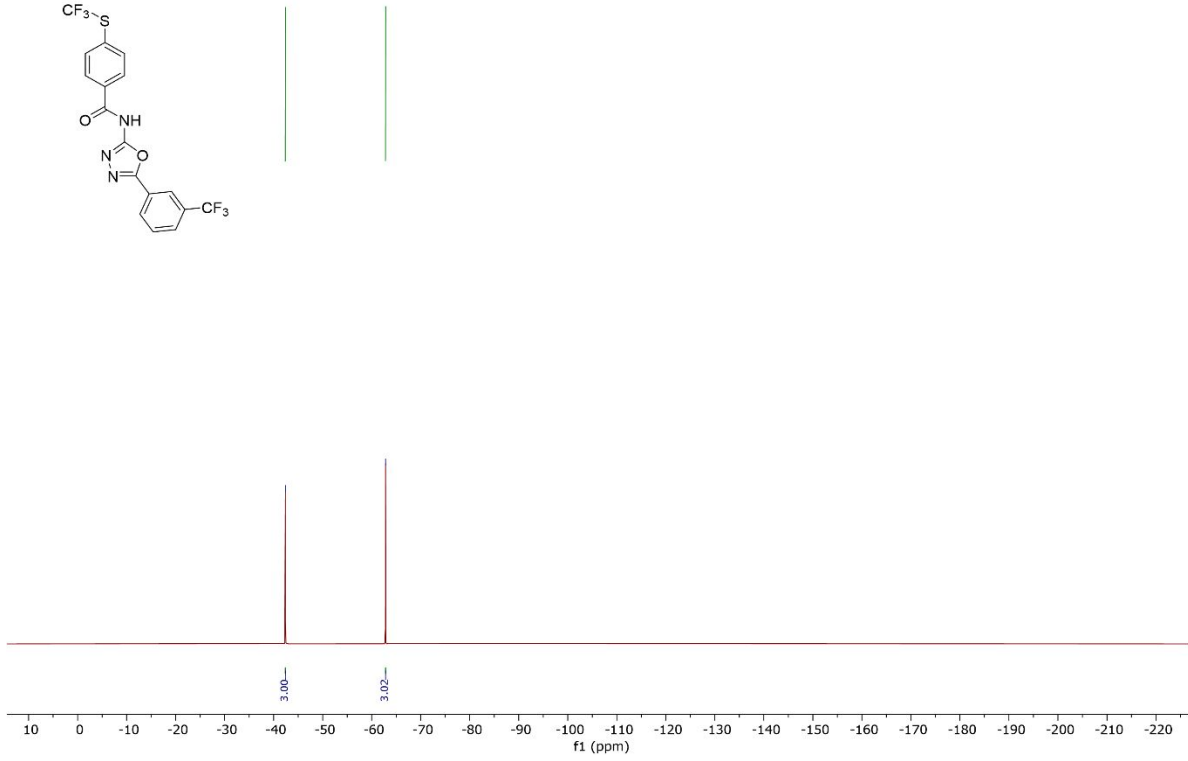

GN-280.1.fid  
H1 standard parameters, cryoprobe prodigy.

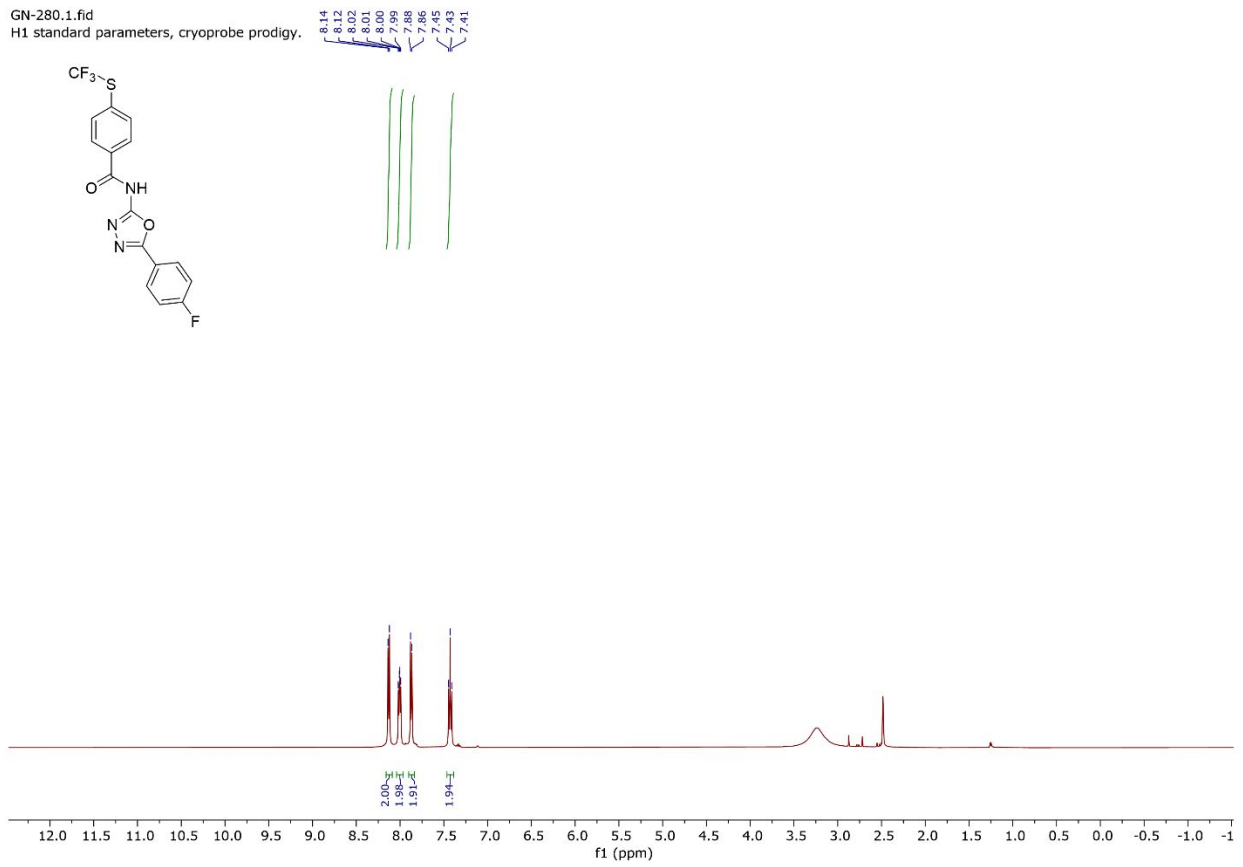

GN-280.1.fid  
H1 standard parameters, cryoprobe prodigy.

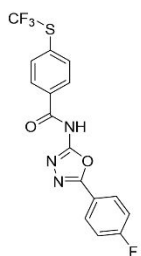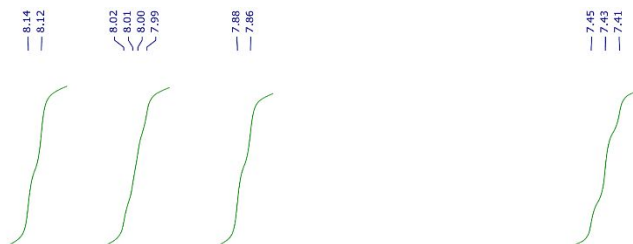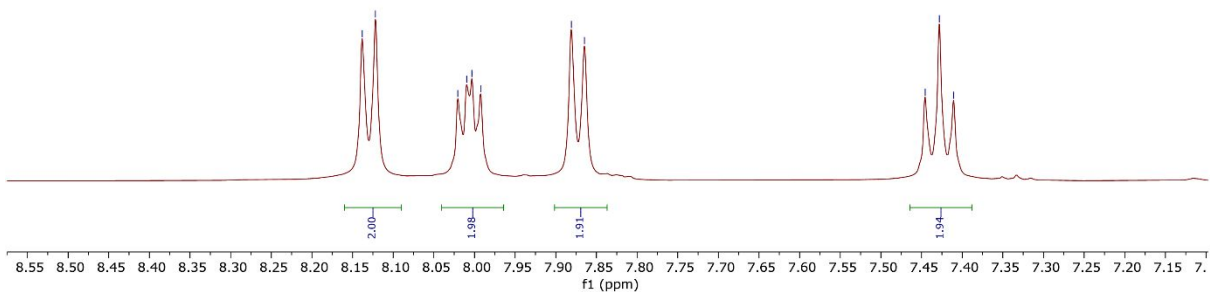

GN-280.2.fid  
C13 standard parameters, cryoprobe prodigy.

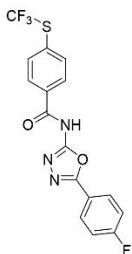

165.51  
162.72  
162.41  
158.56  
138.09  
137.70  
136.60  
136.14  
135.11  
135.30  
135.23  
134.60  
133.60  
133.03  
126.24  
120.49  
117.25  
117.07

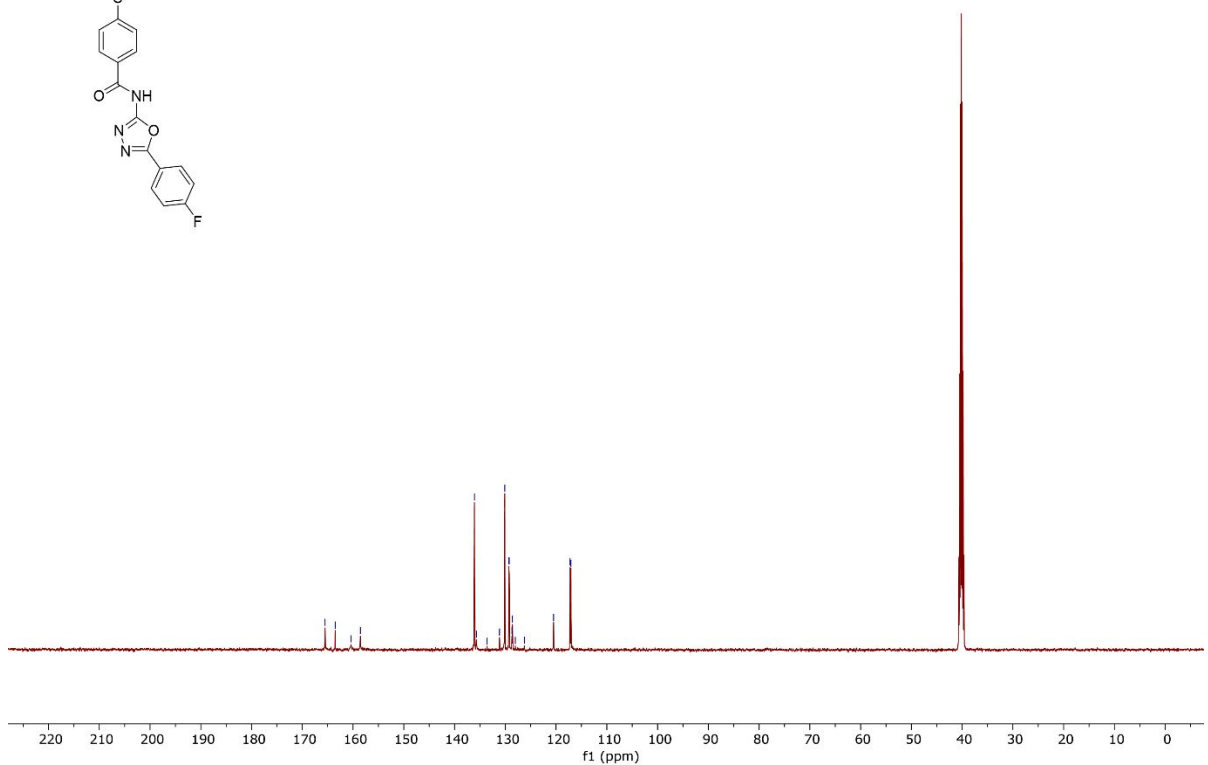

GN-280.3.fid  
F19 standard parameters, cryoprobe prodigy.  
DE is lengthened compared to default.

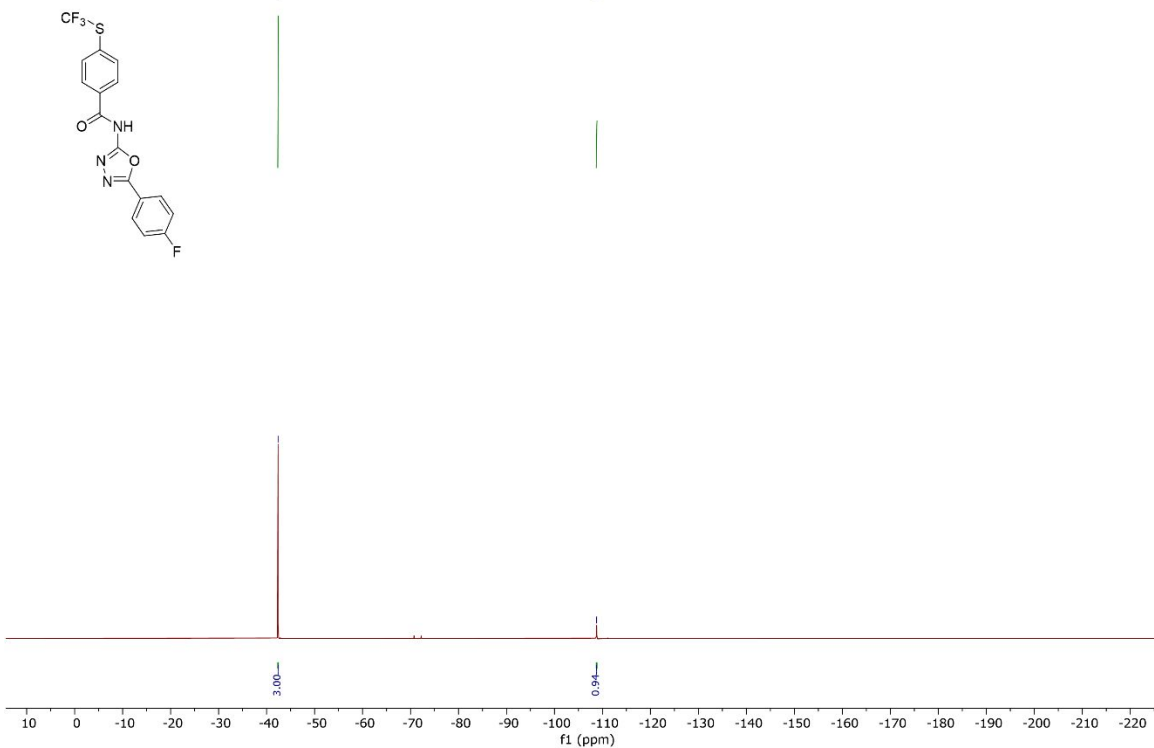

GN-282.1.fid  
H1 standard parameters, cryoprobe prodigy.

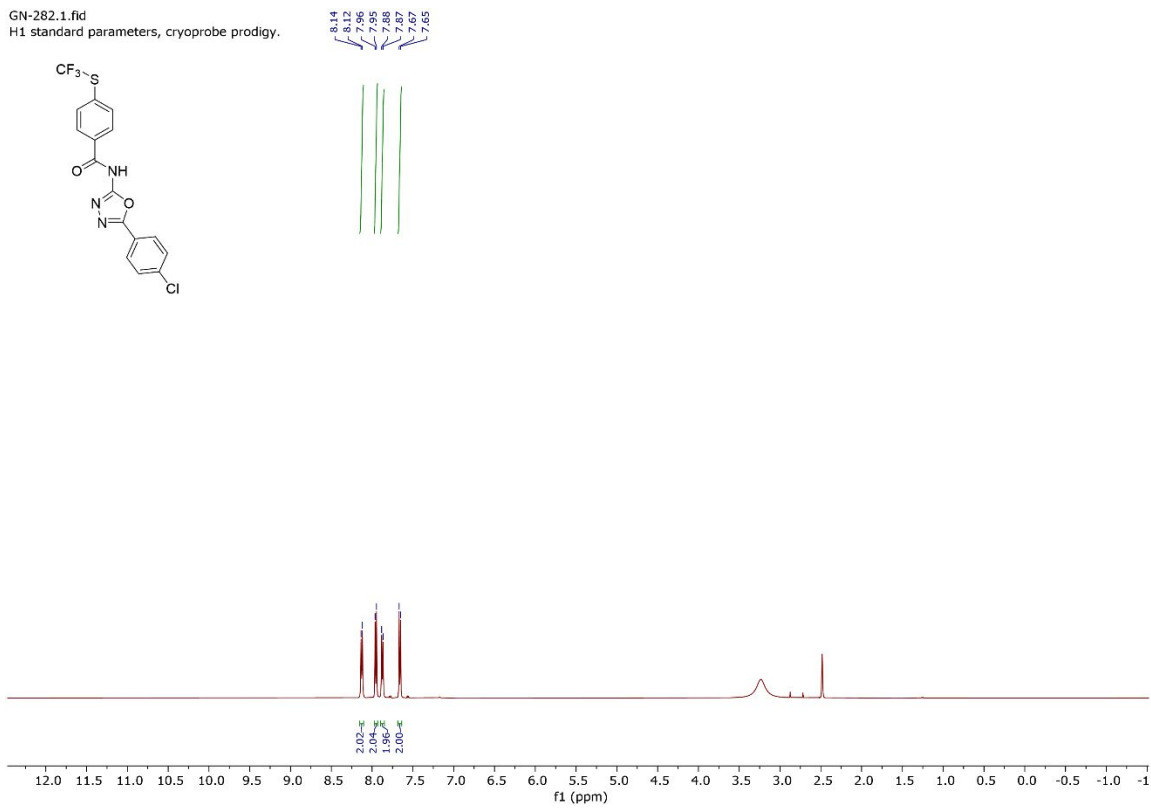



GN-282.3.fid  
F19 standard parameters, cryoprobe prodigy.  
DE is lengthened compared to default.

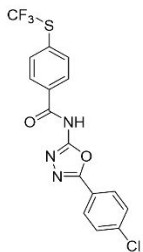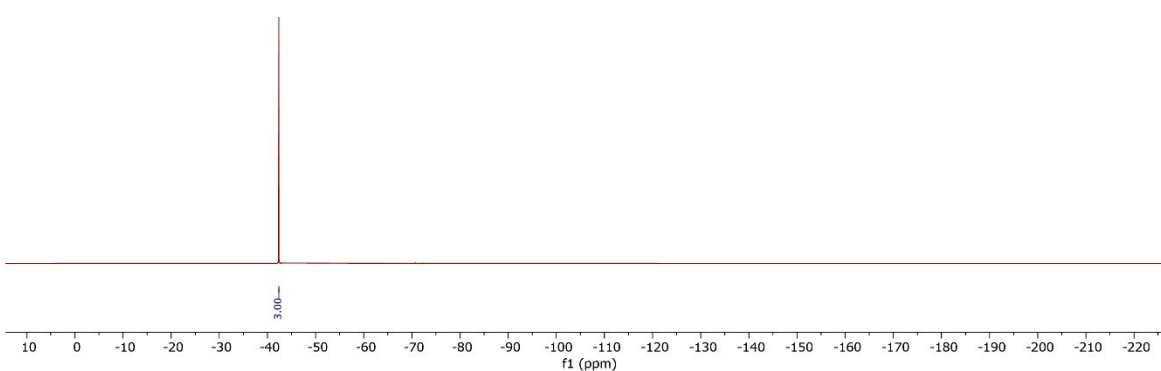

GN-203.1.fid  
H1 standard parameters, cryoprobe prodigy.

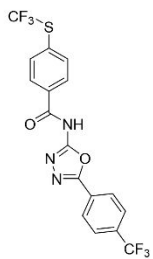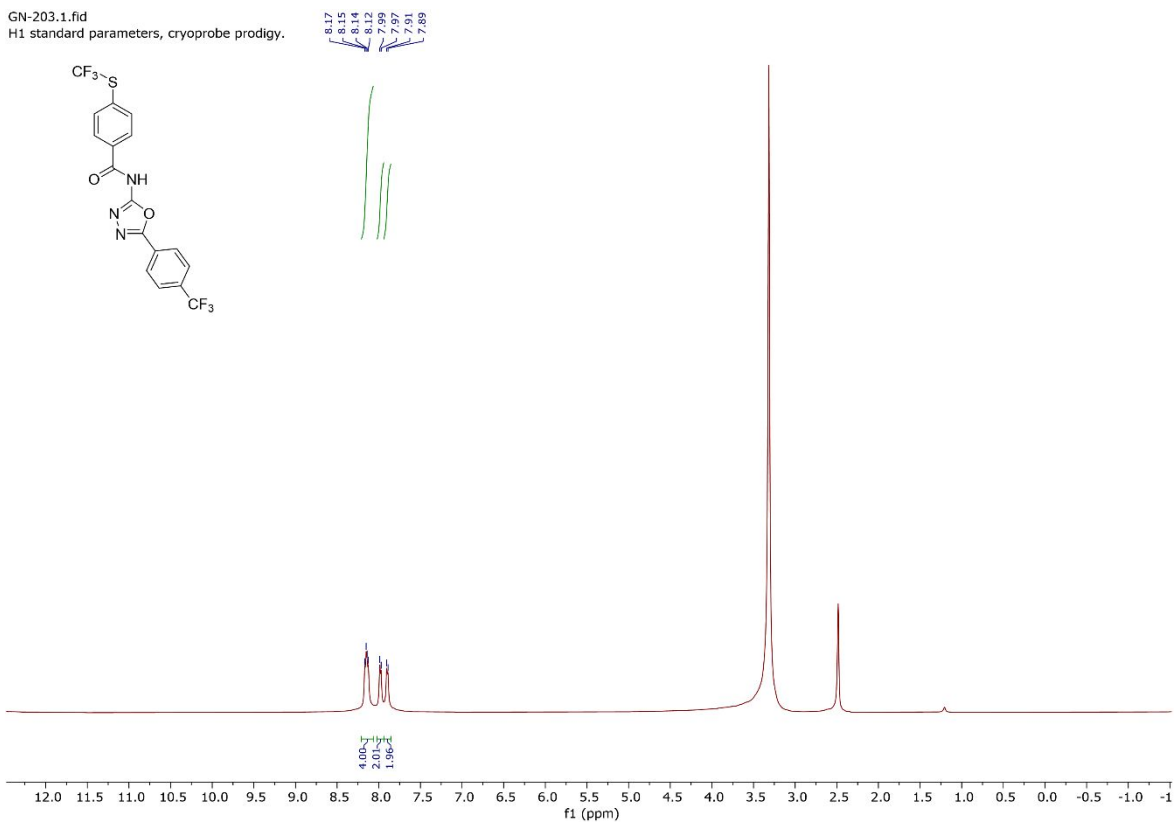

GN-203.1.fid  
H1 standard parameters, cryoprobe prodigy.

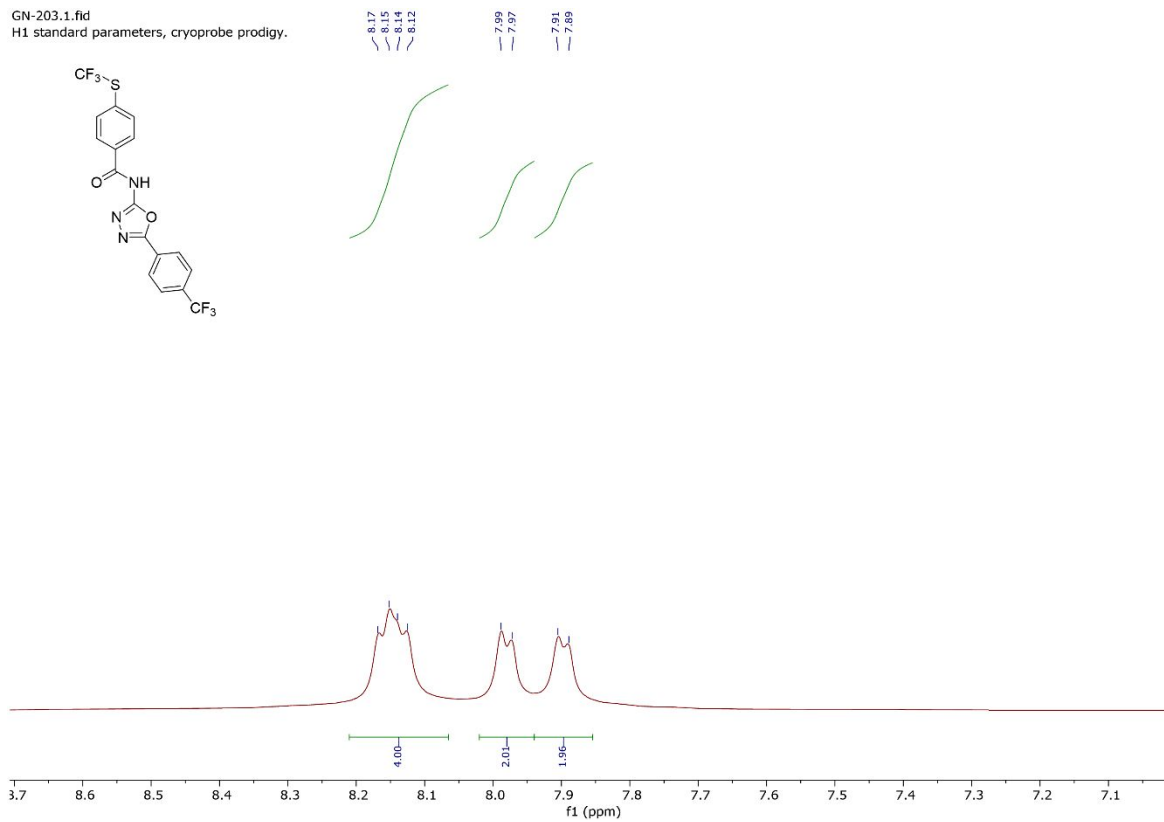

GN-203.2.fid  
C13 standard parameters, cryoprobe prodigy.

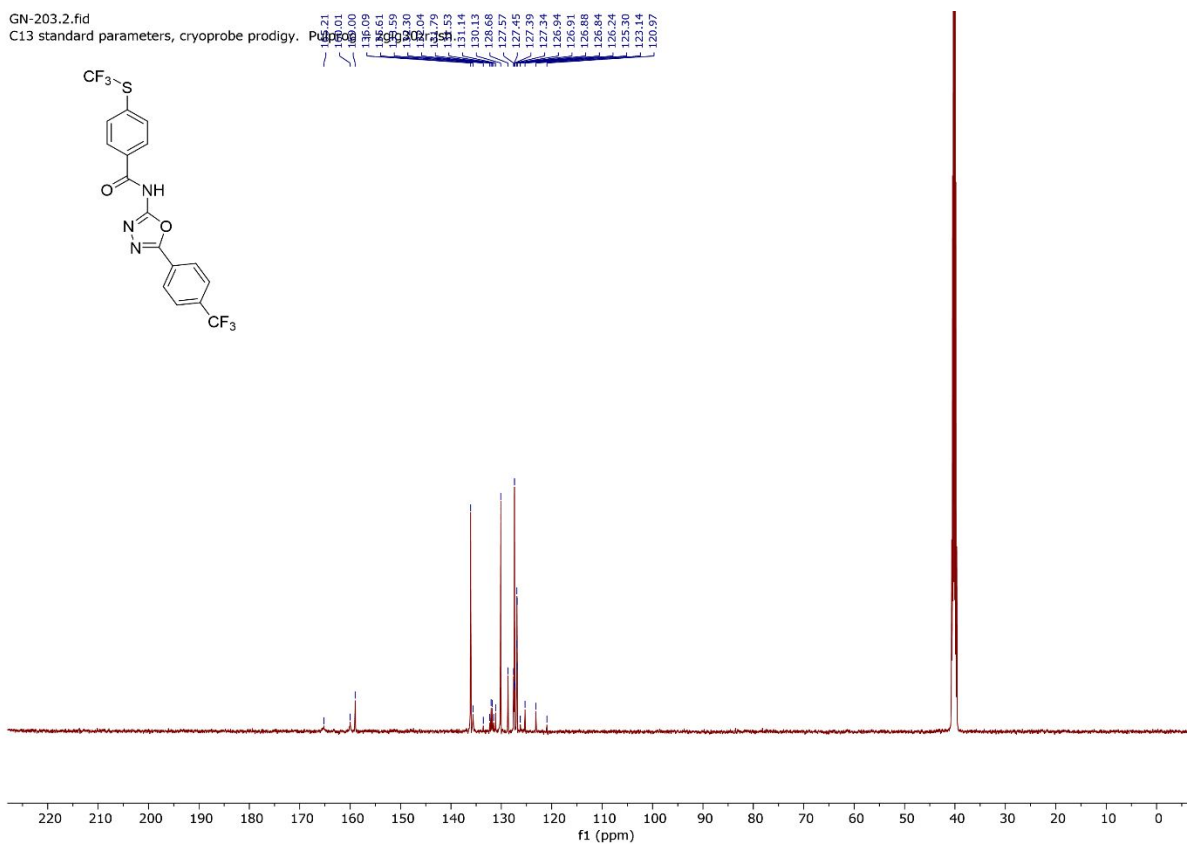

GN-203.3.fid  
F19 standard parameters, cryoprobe prodigy.  
DE is lengthened compared to default.

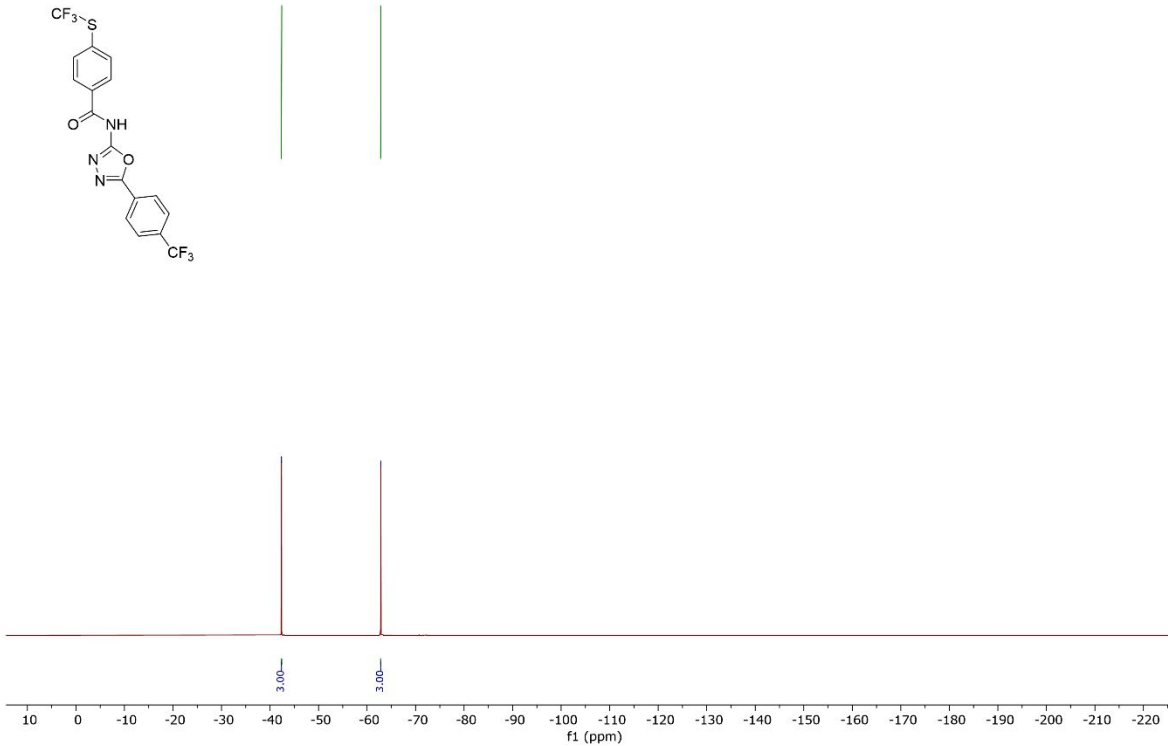

GN-207.1.fid  
H1 standard parameters, cryoprobe prodigy.

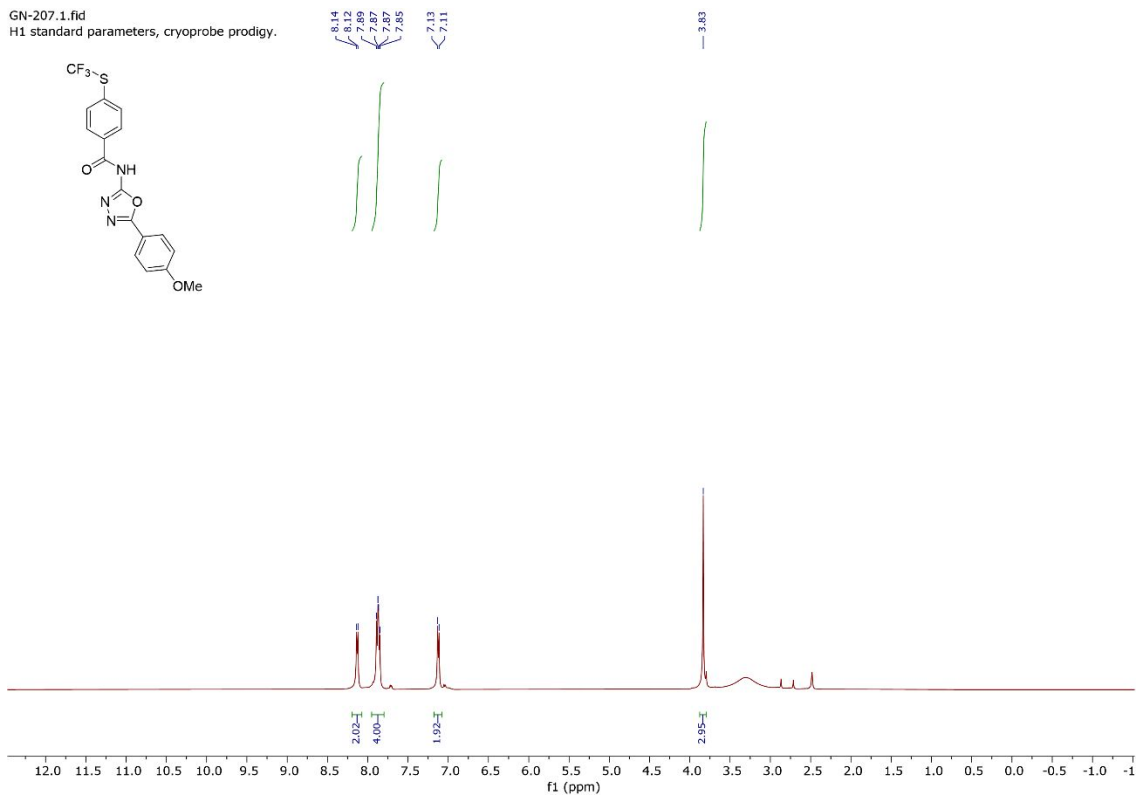

GN-207.1.fid  
H1 standard parameters, cryoprobe prodigy.

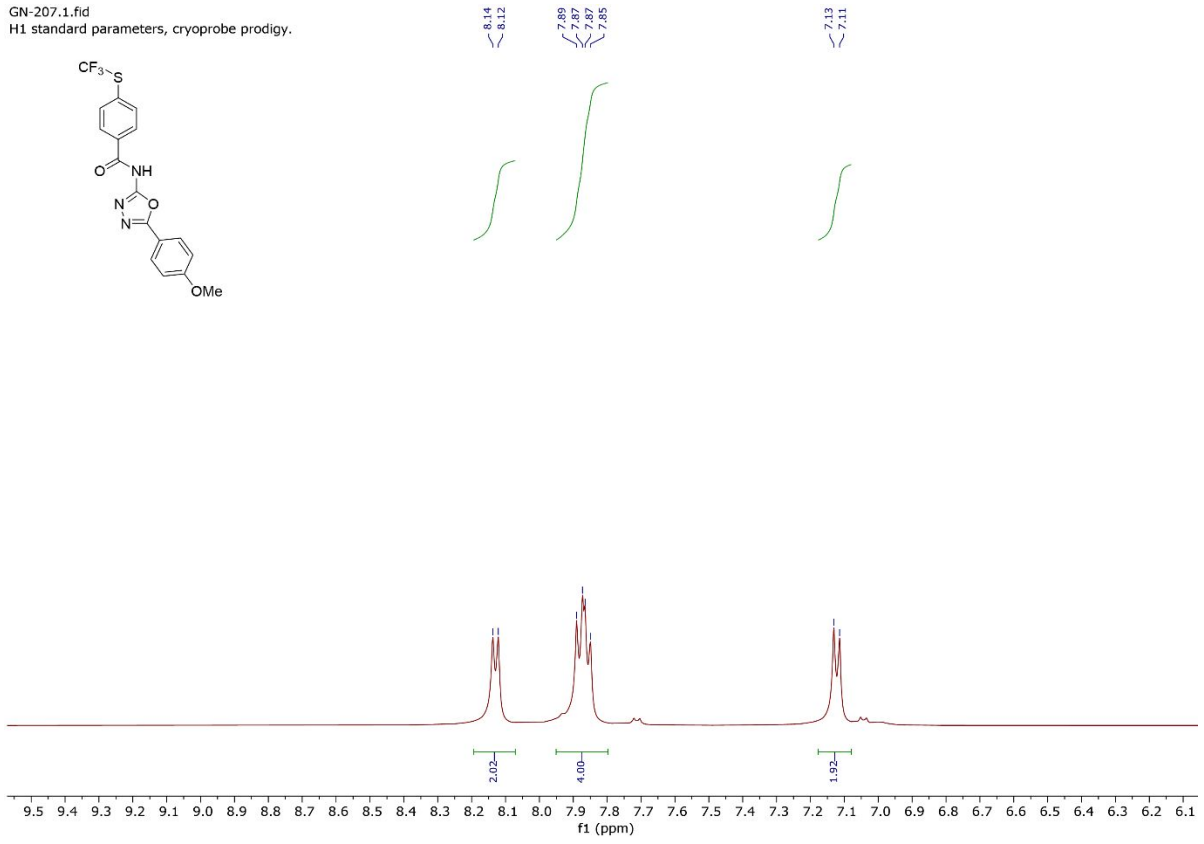

GN-207.1.fid  
H1 standard parameters, cryoprobe prodigy.

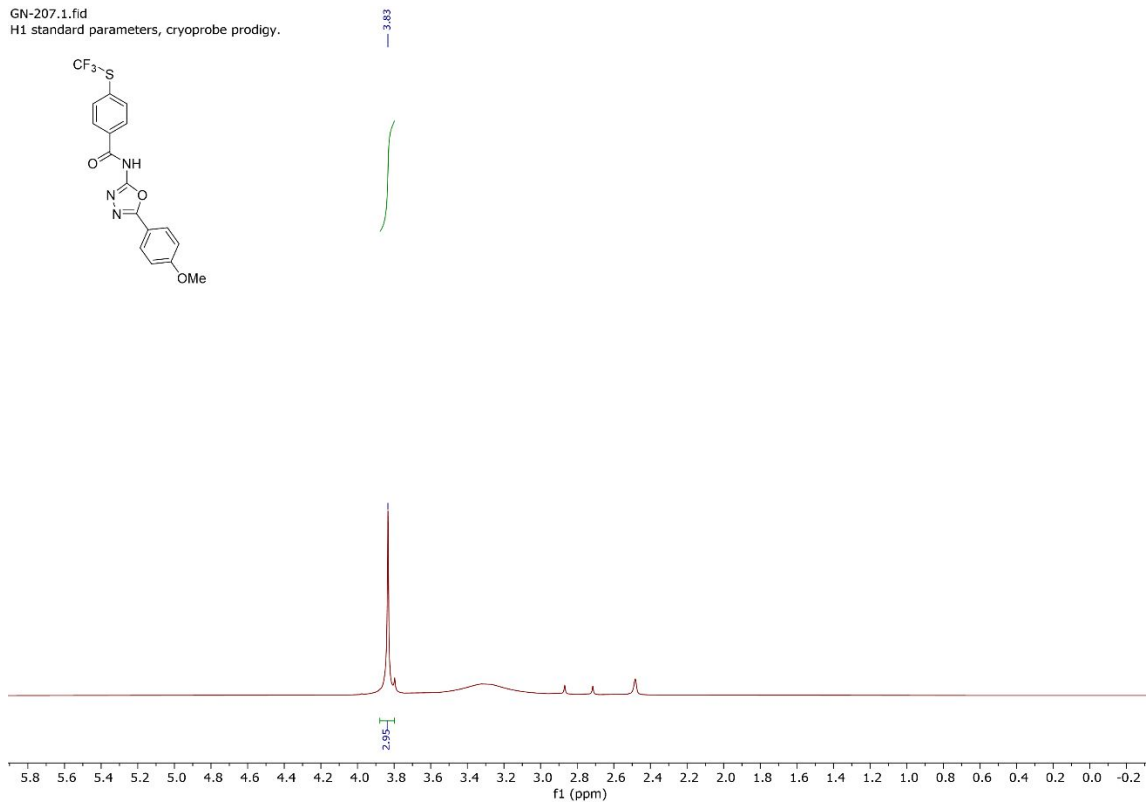



GN-207.2.fid

C13 standard parameters, cryoprobe prodigy.

156.99  
133.56  
131.13  
130.09  
128.68  
127.27  
126.23  
116.13  
115.99  
115.12

55.98

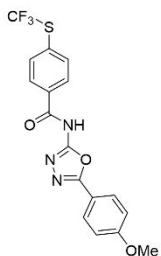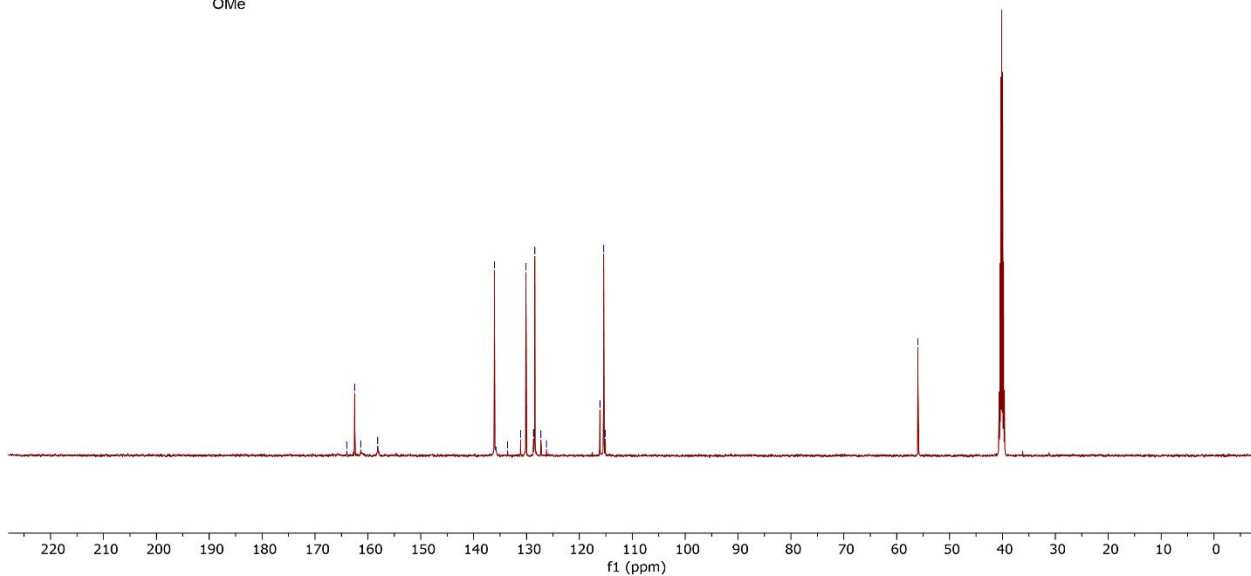

GN-207.3.fid

F19 standard parameters, cryoprobe prodigy.  
DE is lengthened compared to default.

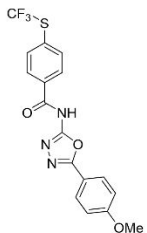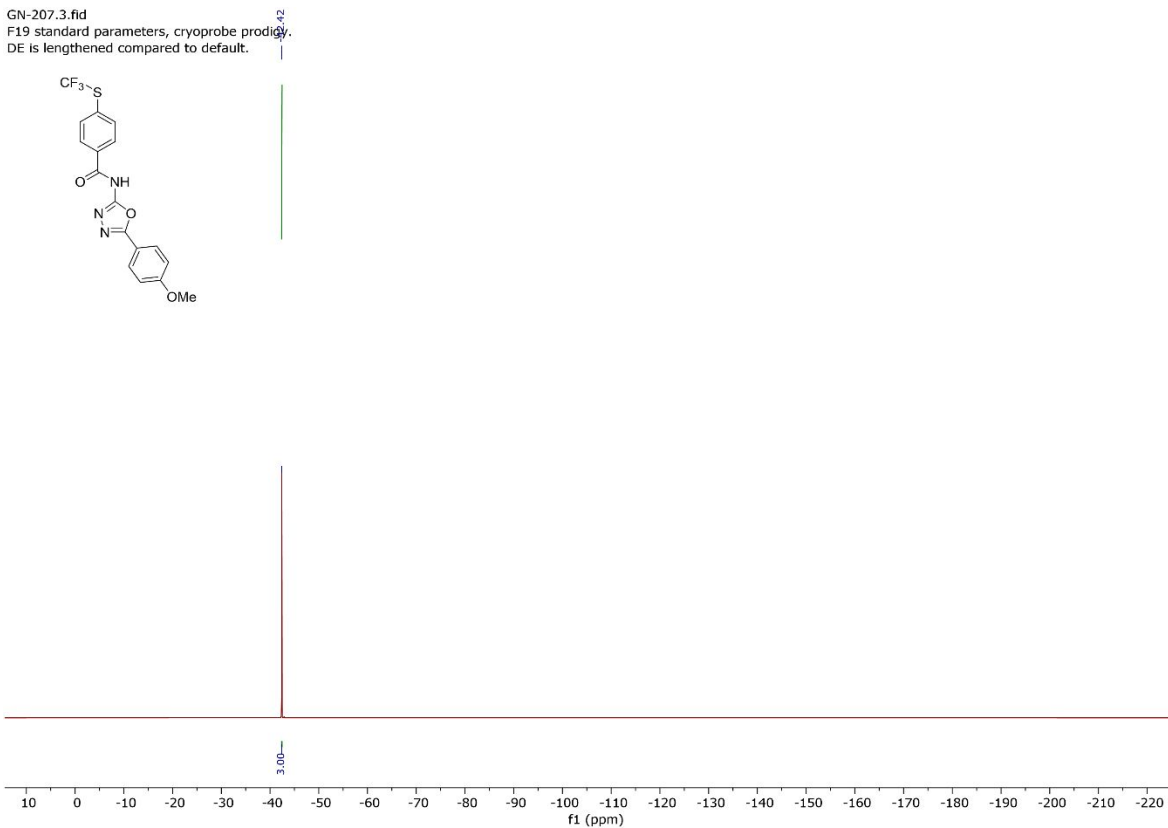

GN-286.1.fid  
H1 standard parameters, cryoprobe prodigy.

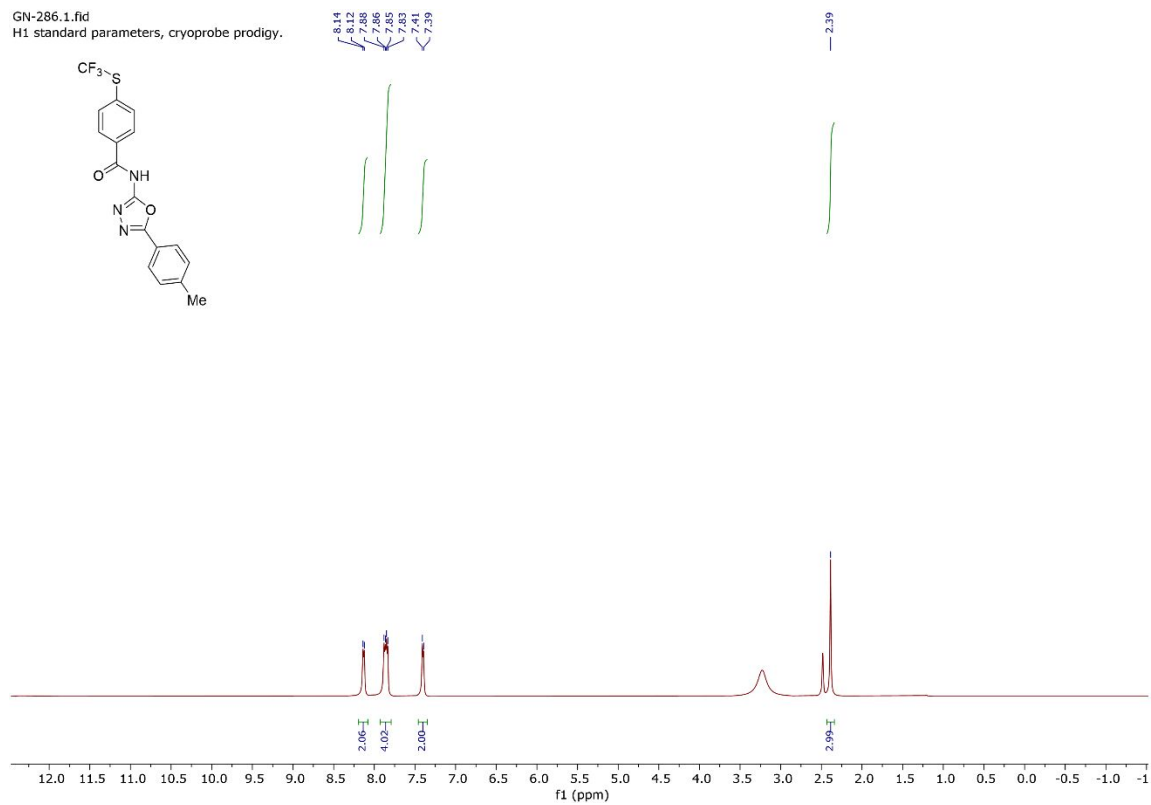

GN-286.1.fid  
H1 standard parameters, cryoprobe prodigy.

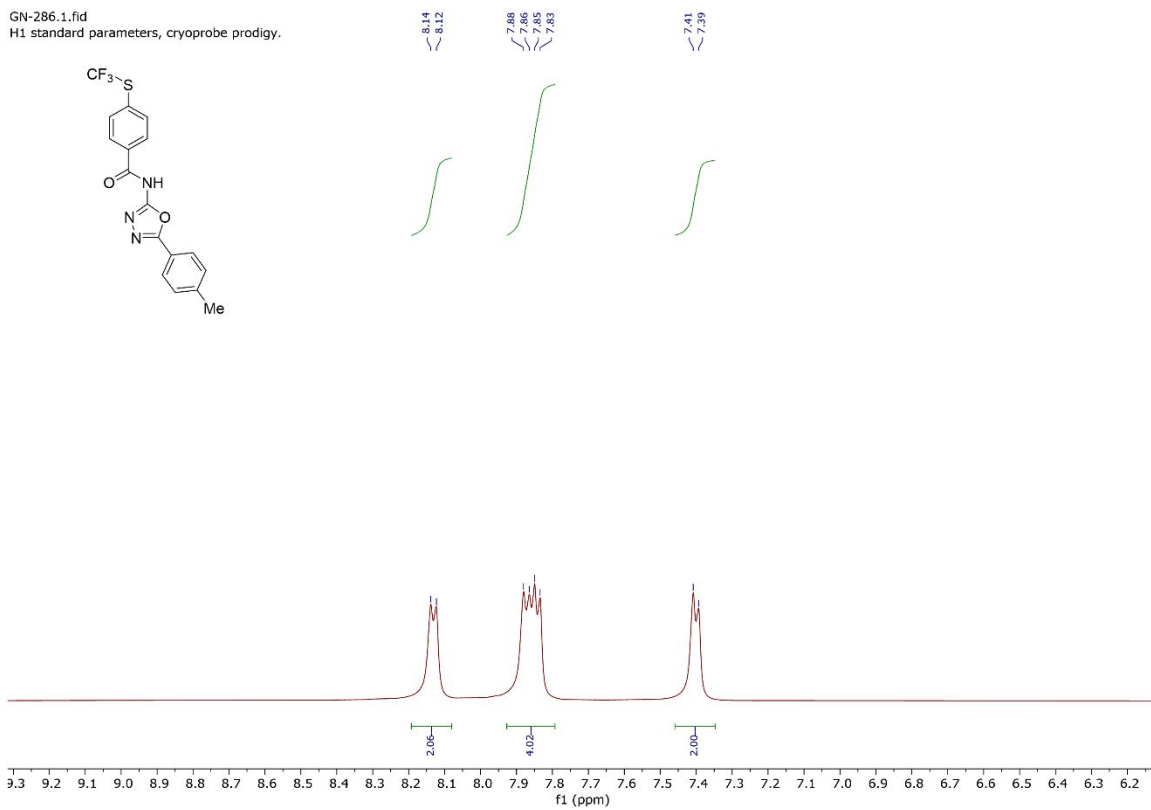

GN-286.1.fid  
H1 standard parameters, cryoprobe prodigy.

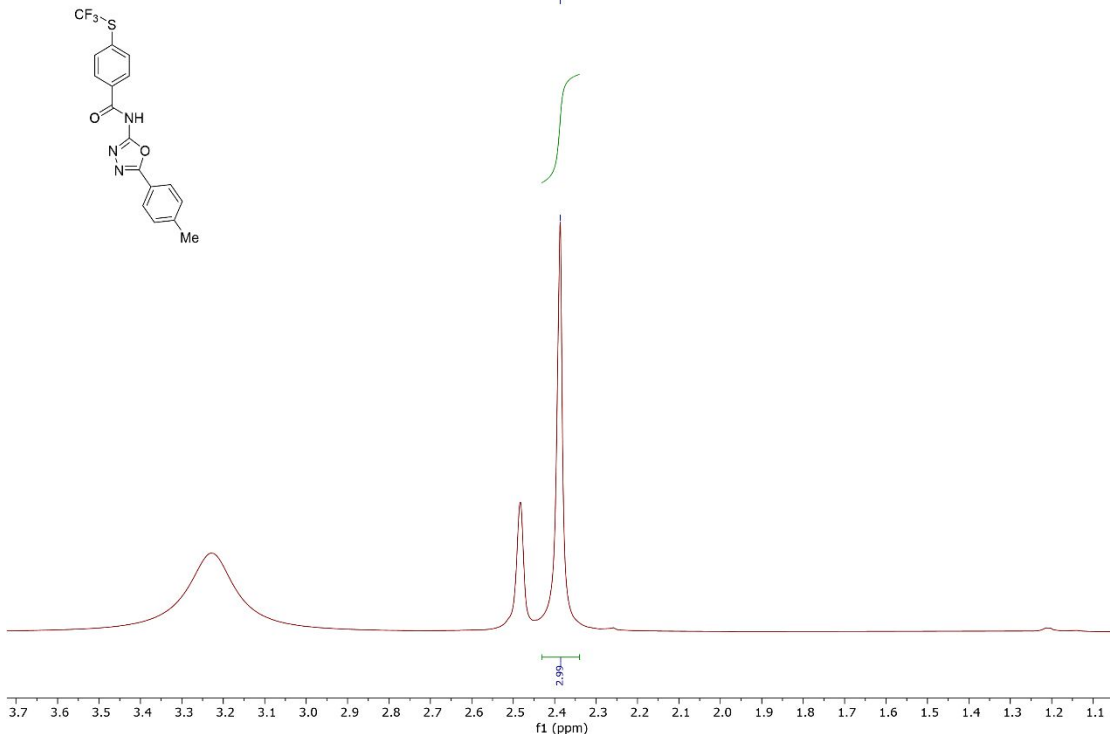

GN-286.2.fid  
C13 standard parameters, cryoprobe prodigy.

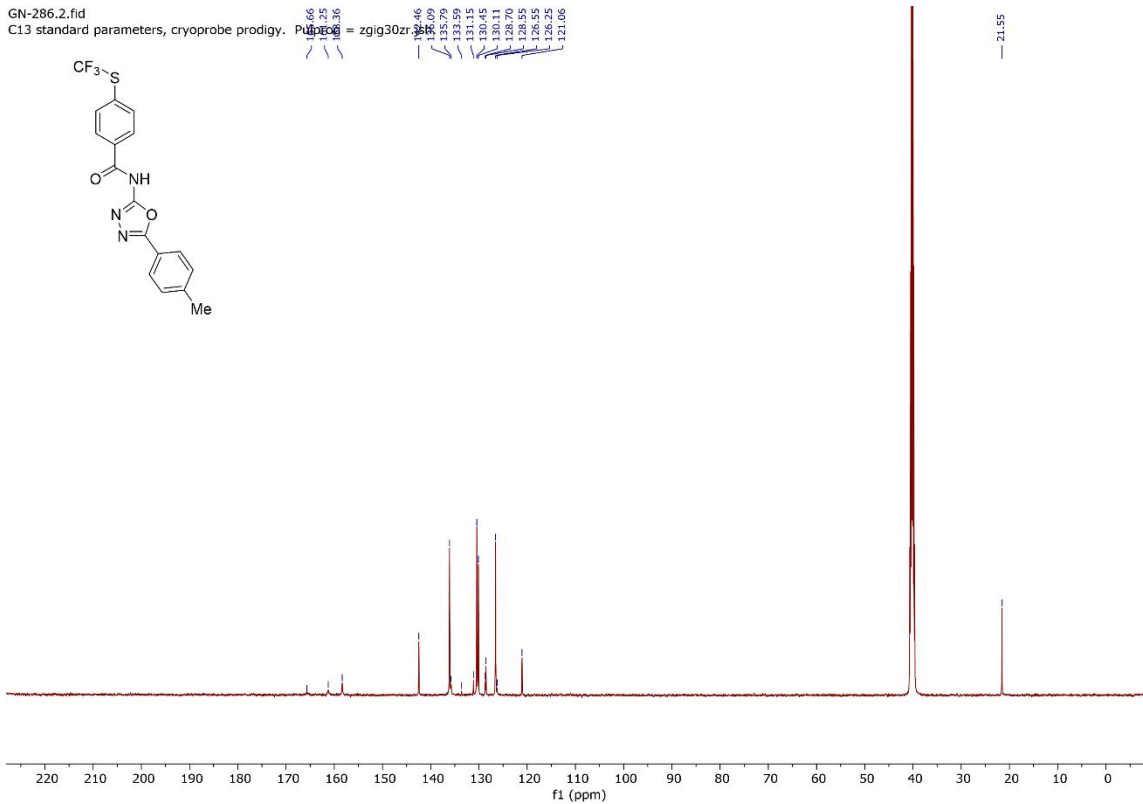

GN-286.3.fid  
F19 standard parameters, cryoprobe prodigy.  
DE is lengthened compared to default.

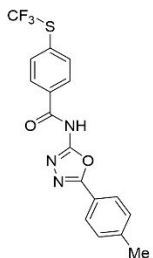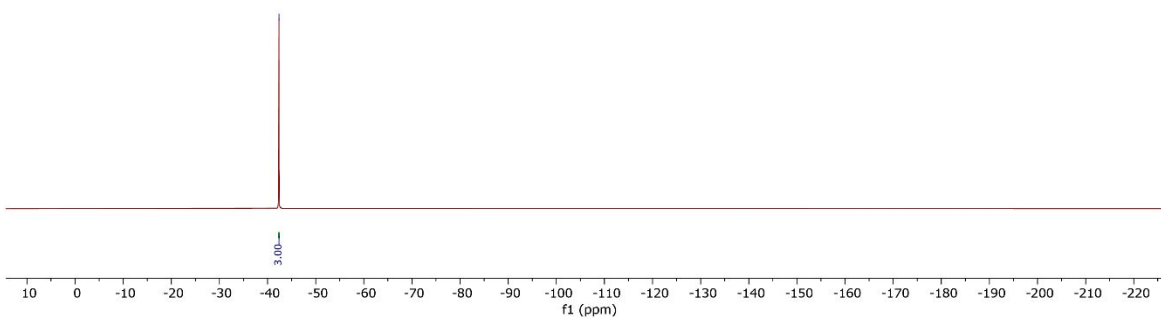

GN-279.1.fid  
H1 standard parameters, cryoprobe prodigy.

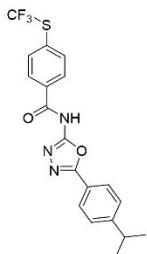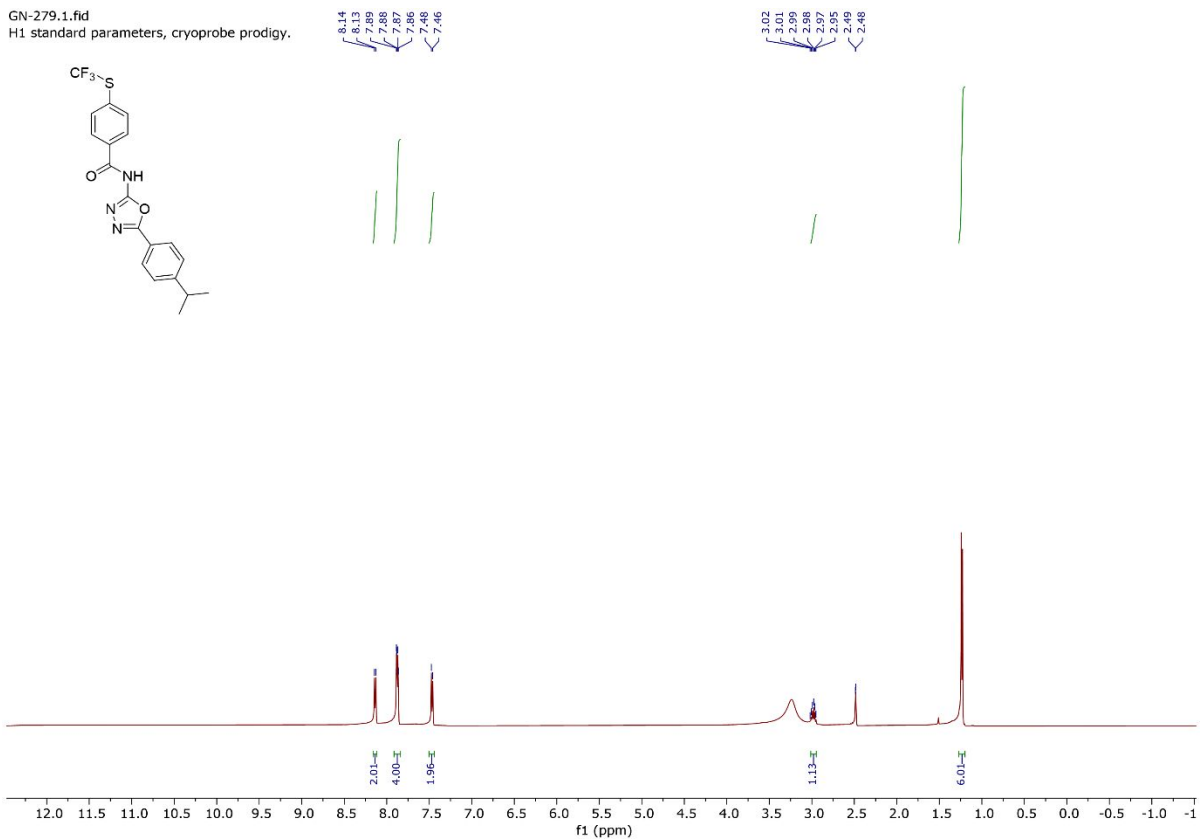

GN-279.1.fid

H1 standard parameters, cryoprobe prodigy.

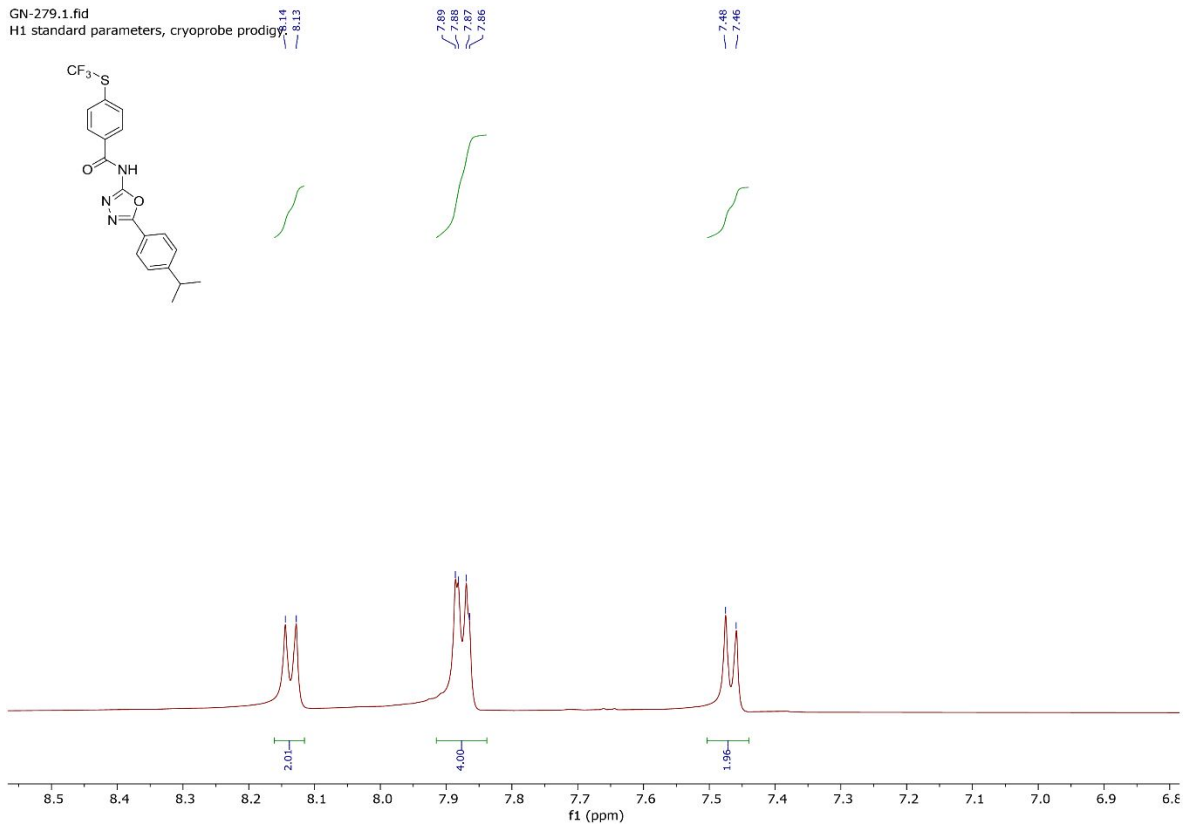

GN-279.1.fid

H1 standard parameters, cryoprobe prodigy.

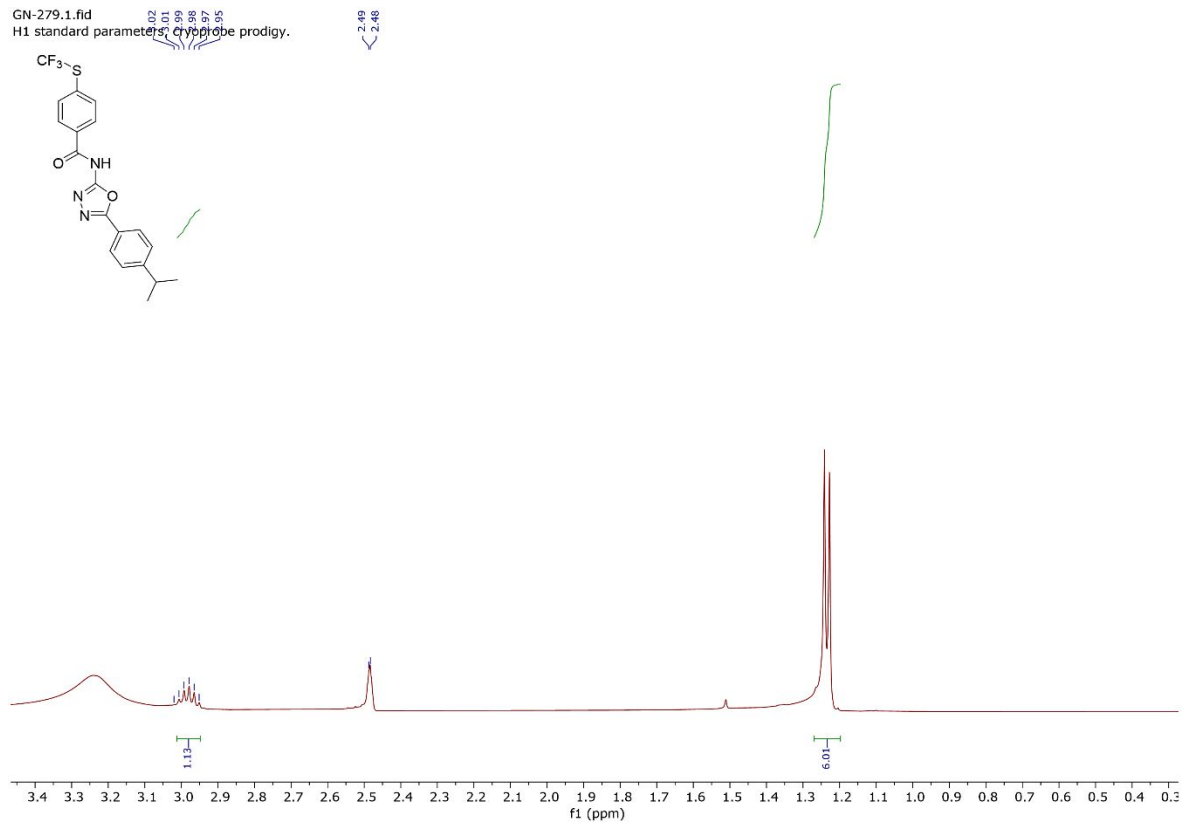

GN-279.2.fid  
C13 standard parameters, cryoprobe prodigy.

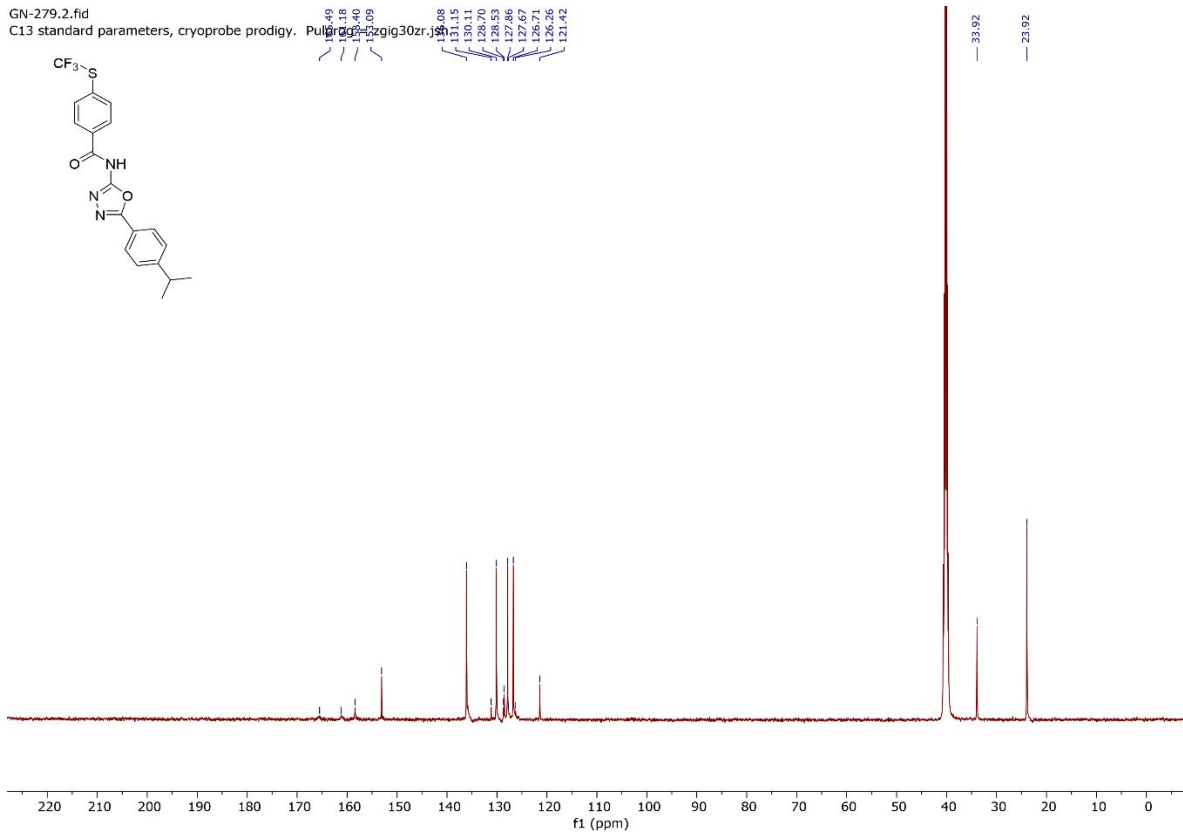

GN-279.3.fid  
F19 standard parameters, cryoprobe prodigy.  
DE is lengthened compared to default.

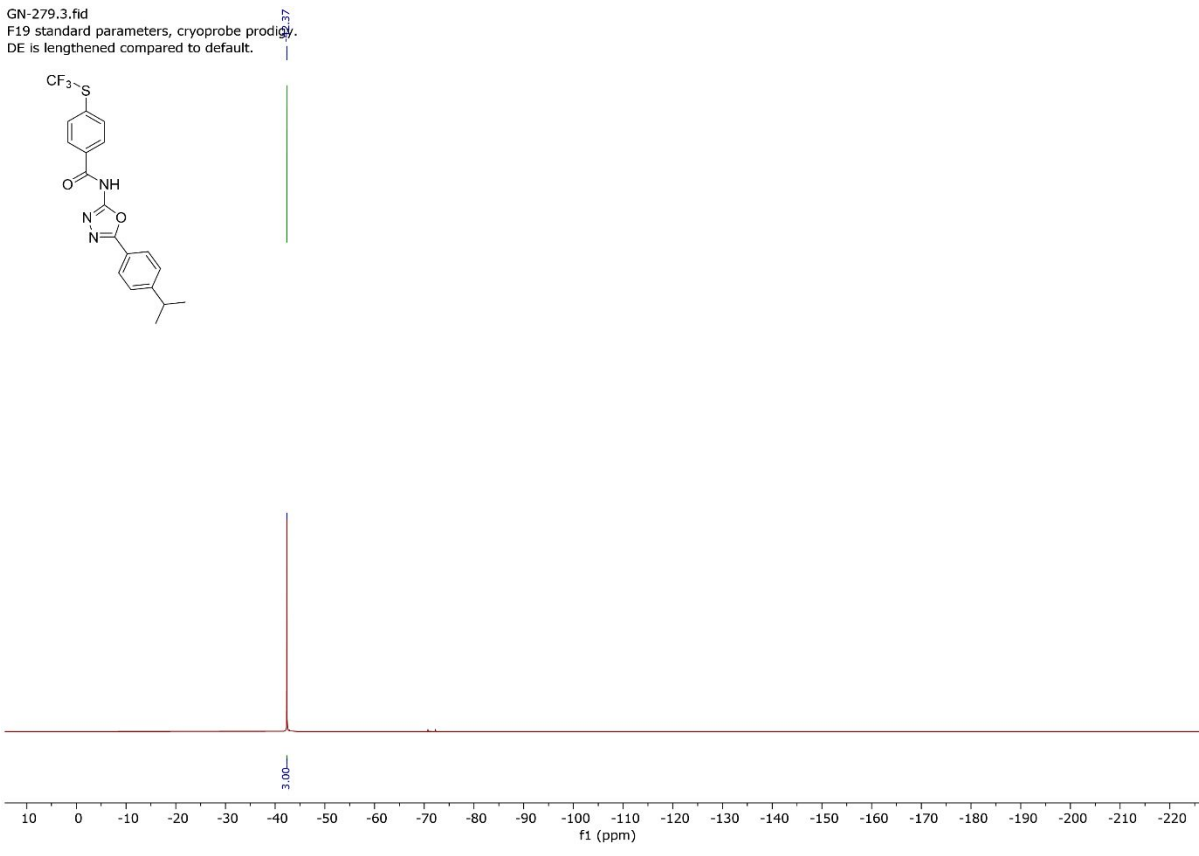

GN-248.1.fid  
H1 standard parameters, cryoprobe prodigy.

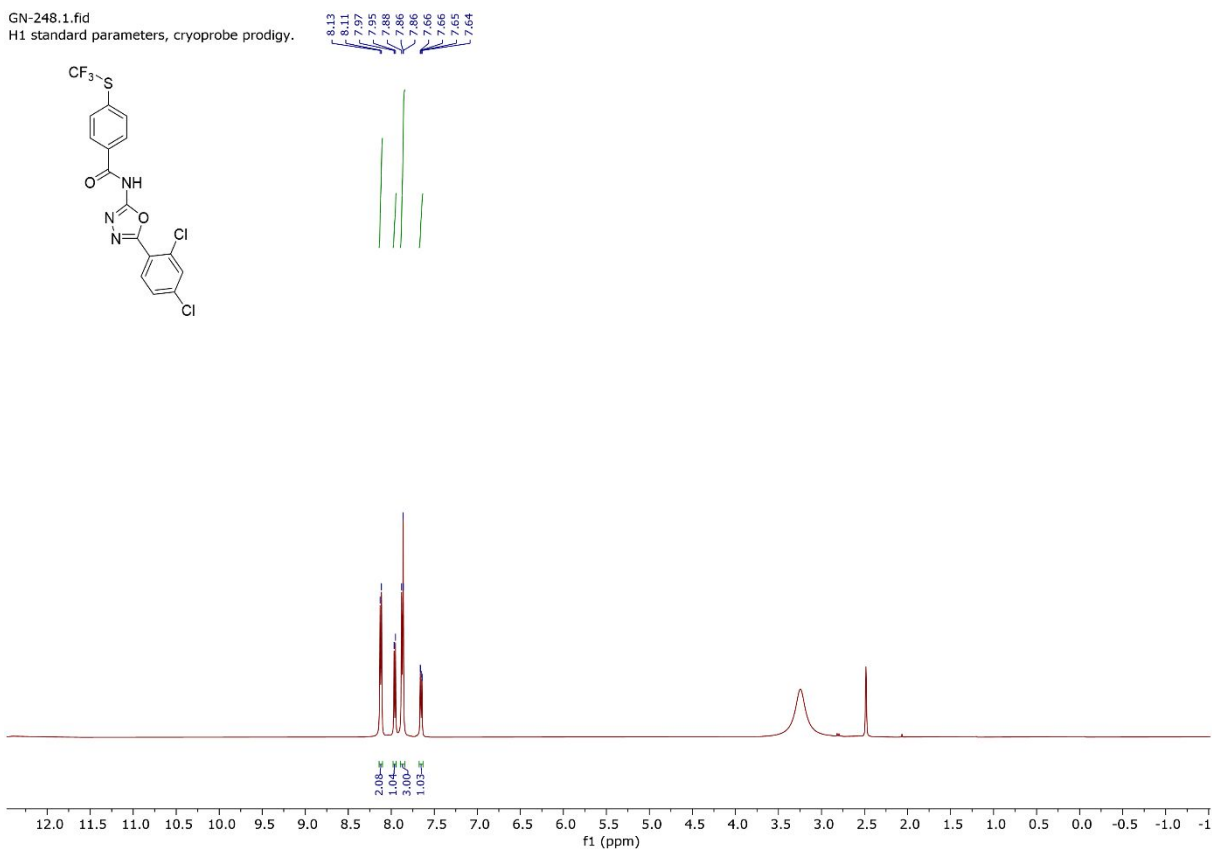

GN-248.1.fid  
H1 standard parameters, cryoprobe prodigy.

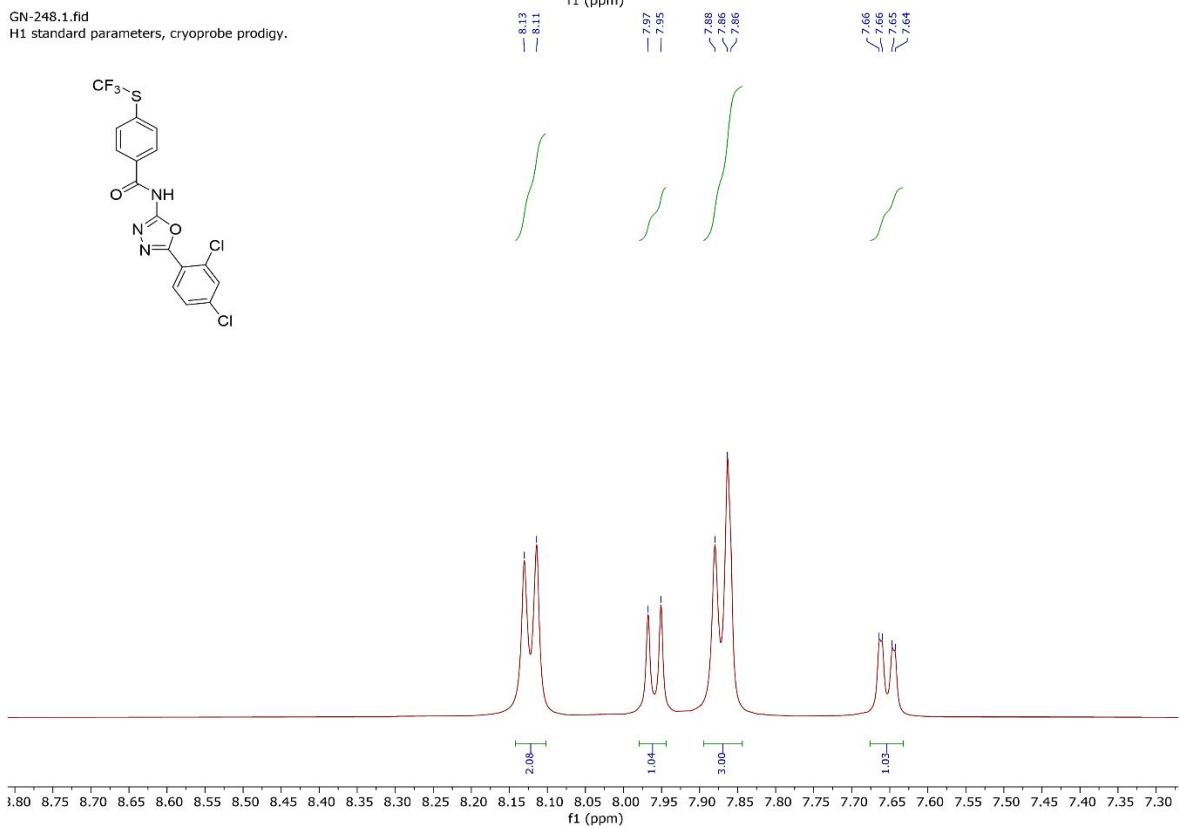

GN-248.2.fid  
C13 standard parameters, cryoprobe prodigy.

prog = zgig3024  
118.00  
118.81  
132.47  
133.07  
133.53  
133.58  
133.25  
132.56  
131.48  
131.13  
130.13  
128.68  
126.23  
121.99

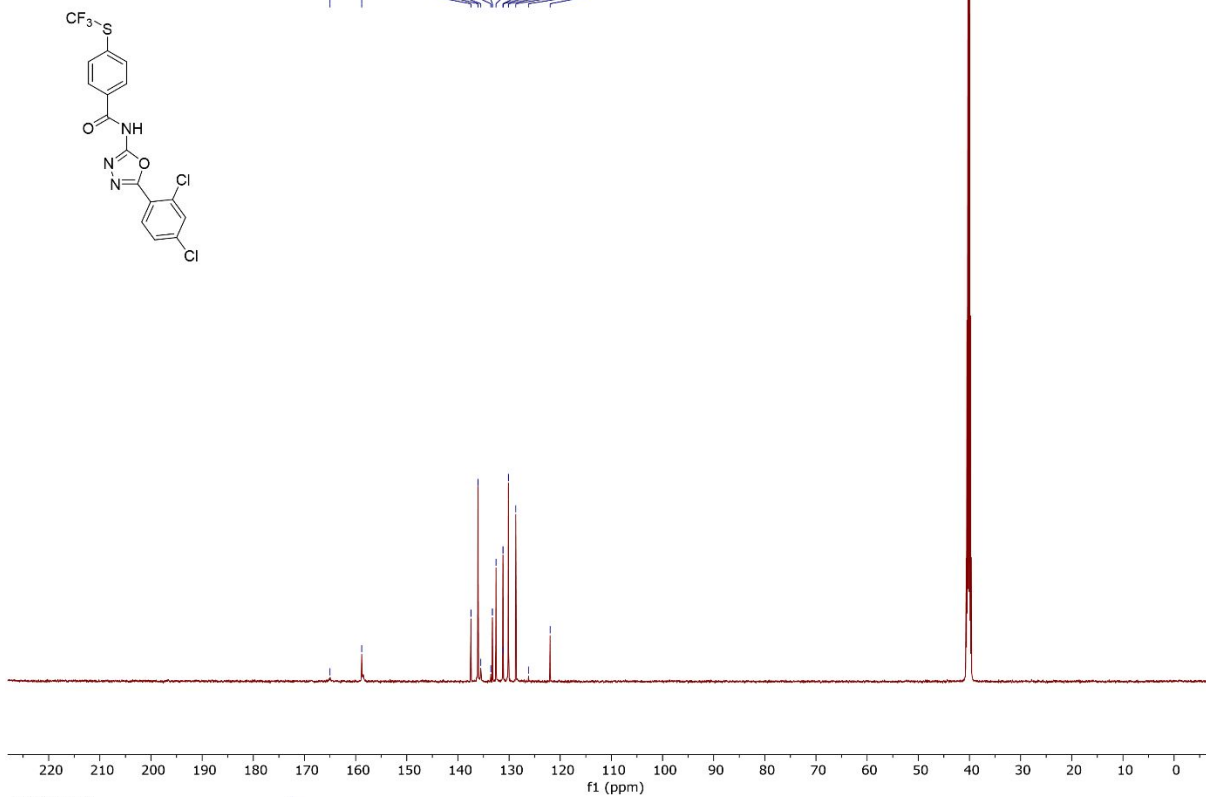

GN-248.3.fid  
F19 standard parameters, cryoprobe prodigy.  
DE is lengthened compared to default.

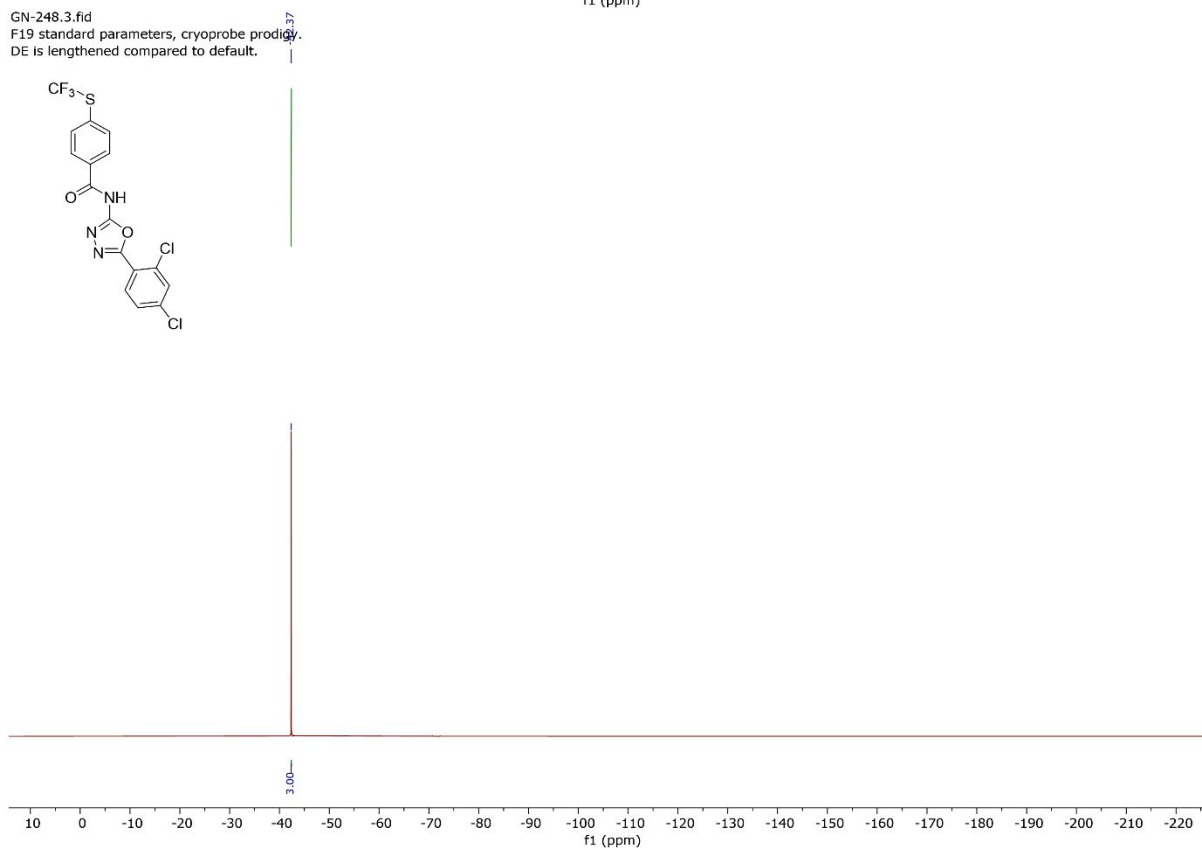



GN-218.1.fid  
H1 standard parameters, cryoprobe prodigy.

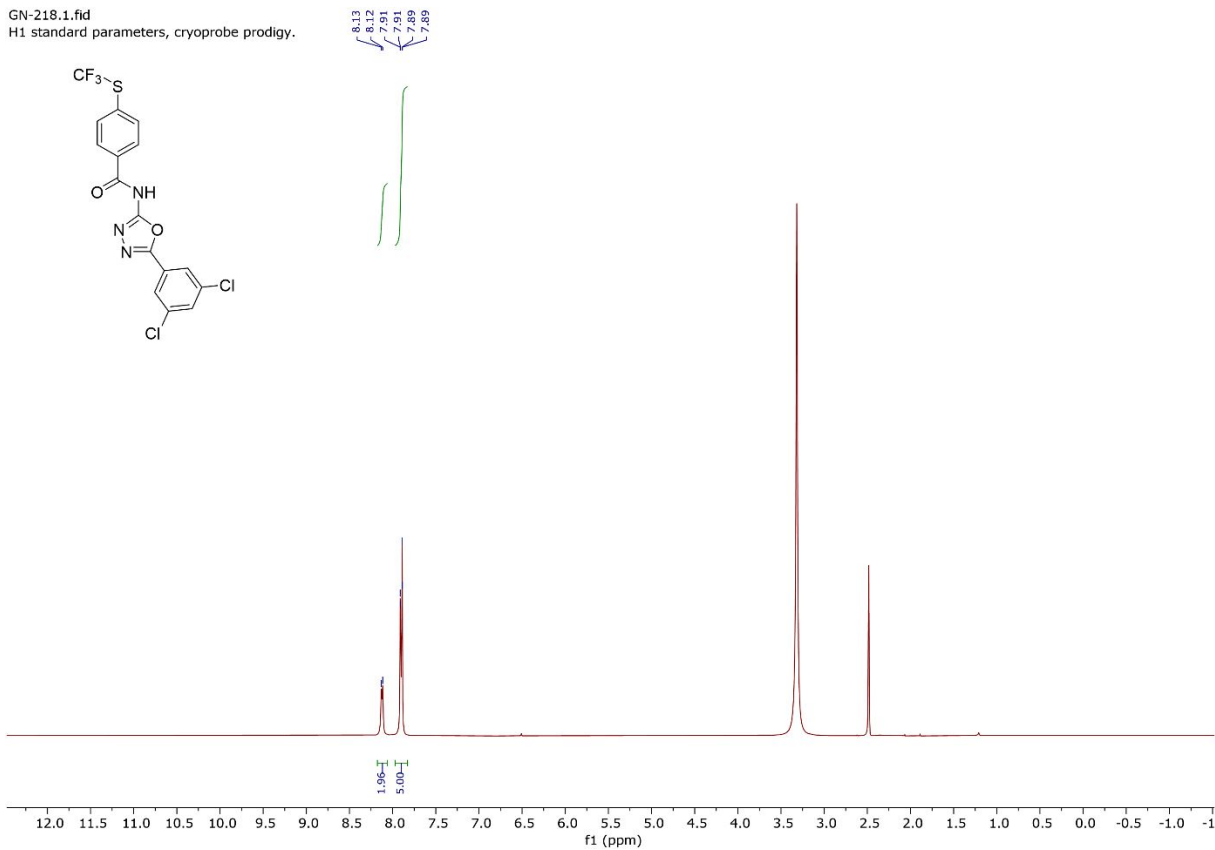

GN-218.1.fid  
H1 standard parameters, cryoprobe prodigy.

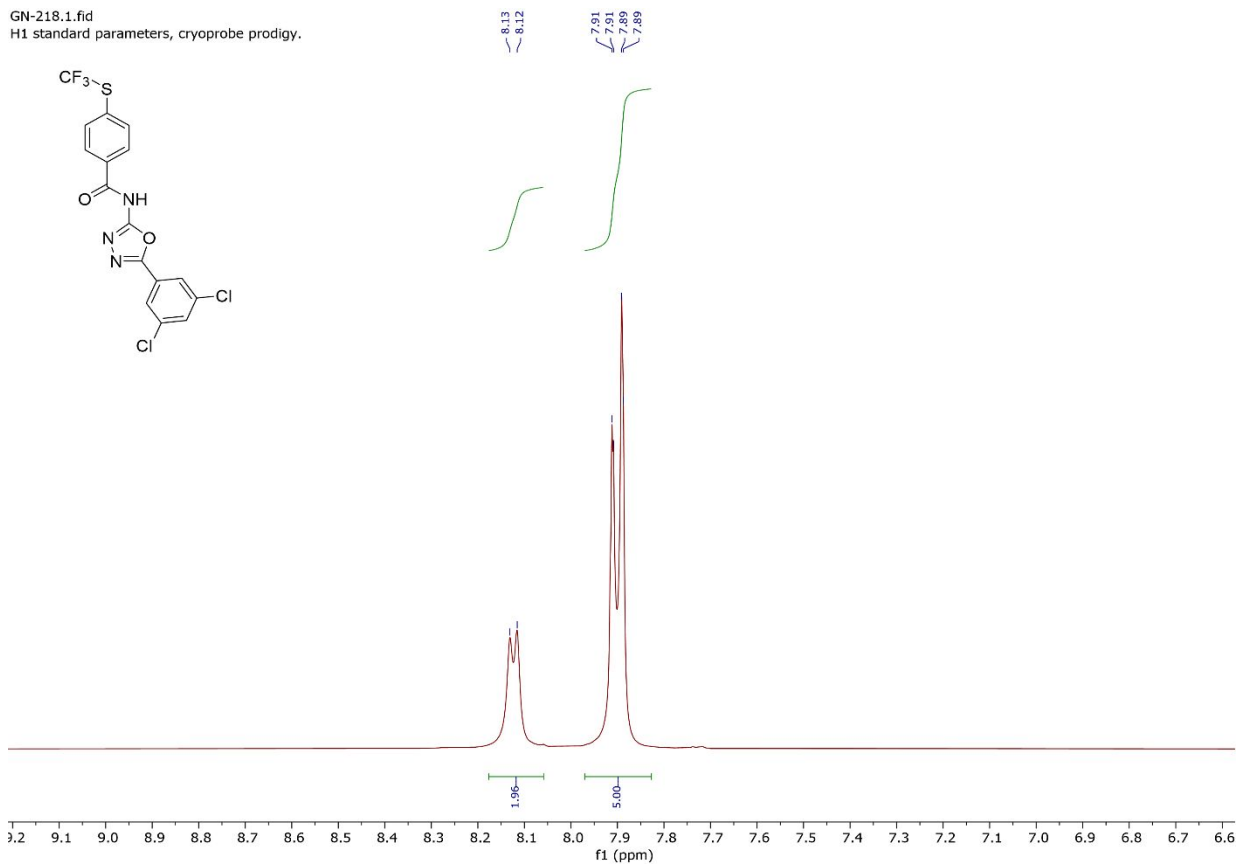

[S33]

GN-218.2.fid  
C13 standard parameters, cryoprobe prodigy.

124.41  
124.70  
124.70  
124.07  
124.51  
124.59  
124.40  
124.16  
124.14  
124.51  
124.58  
124.19  
124.27  
124.91

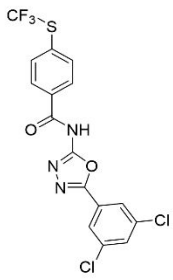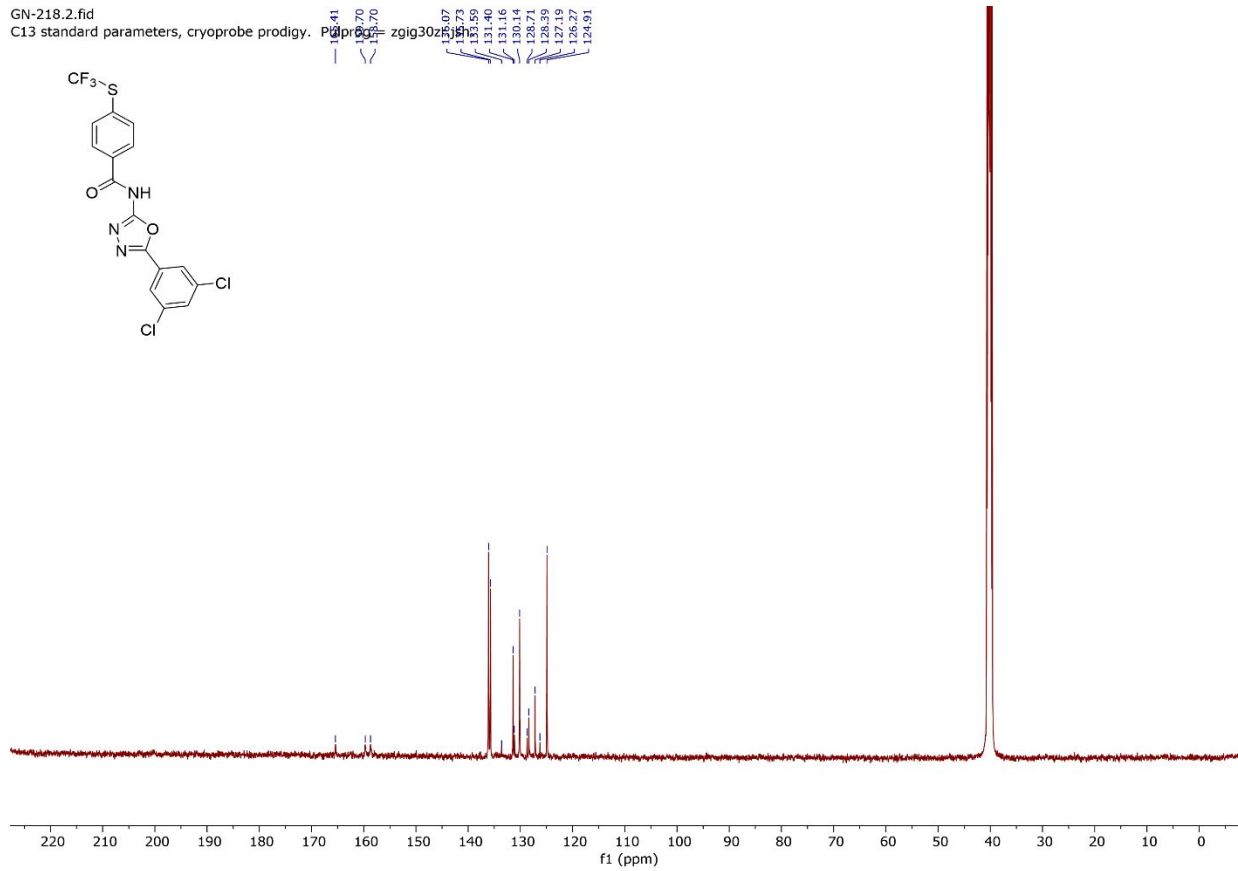

GN-218.3.fid  
F19 standard parameters, cryoprobe prodigy.  
DE is lengthened compared to default.

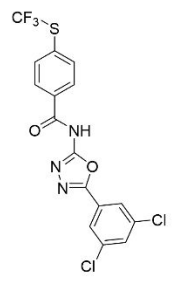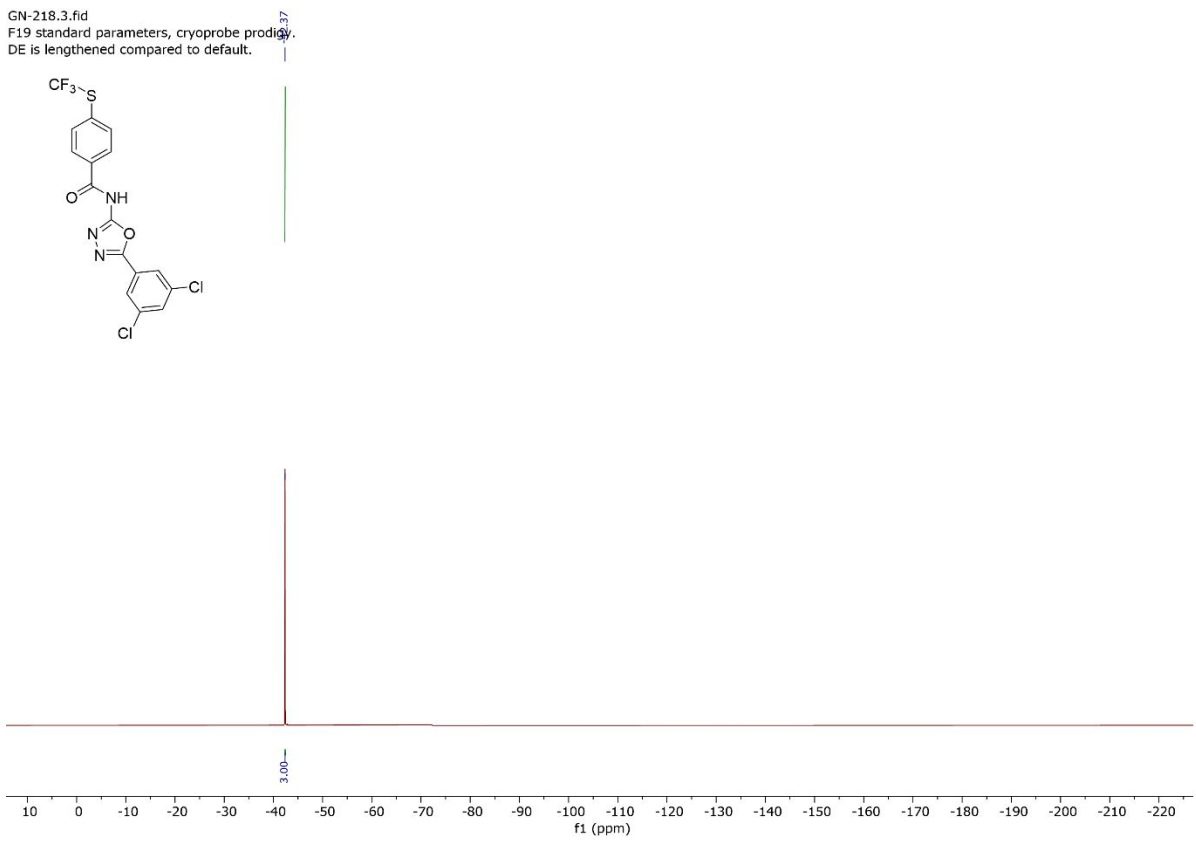

GN-252.1.fid  
H1 standard parameters, cryoprobe prodigy.

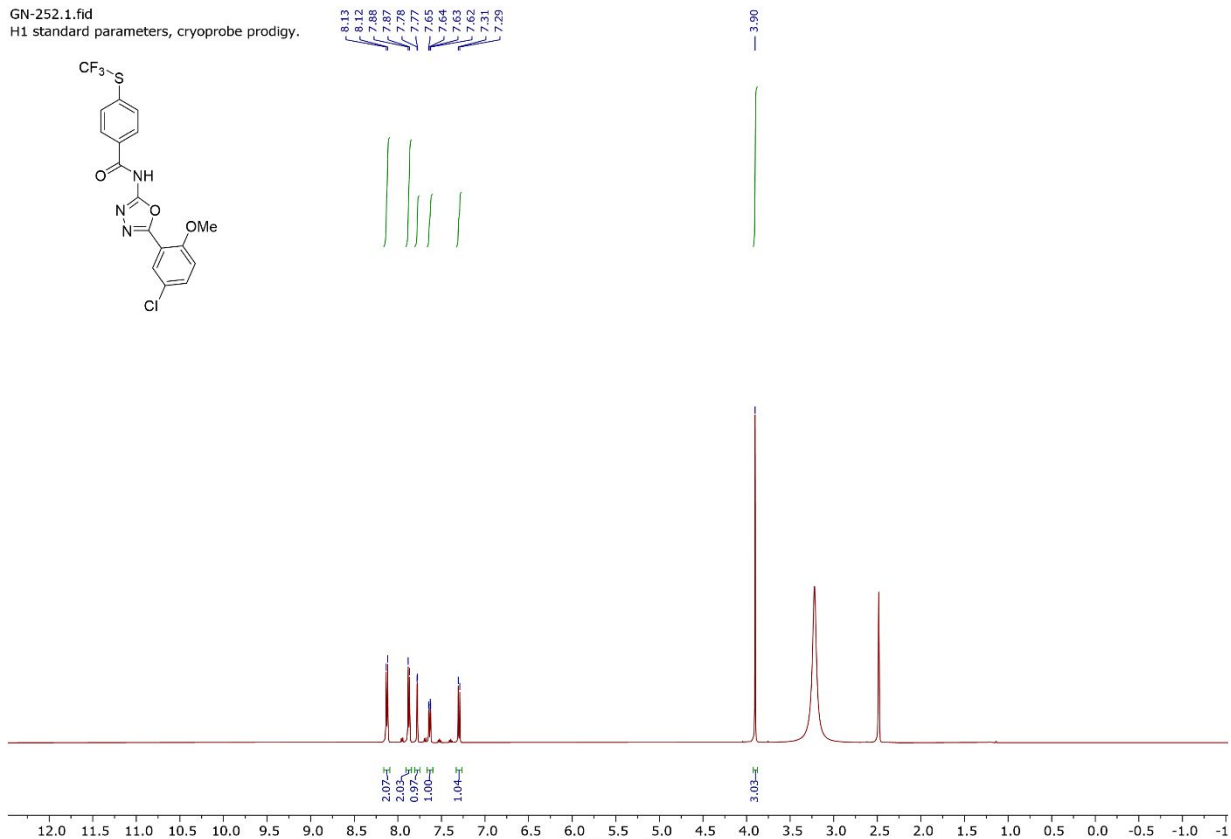

GN-252.1.fid  
H1 standard parameters, cryoprobe prodigy.

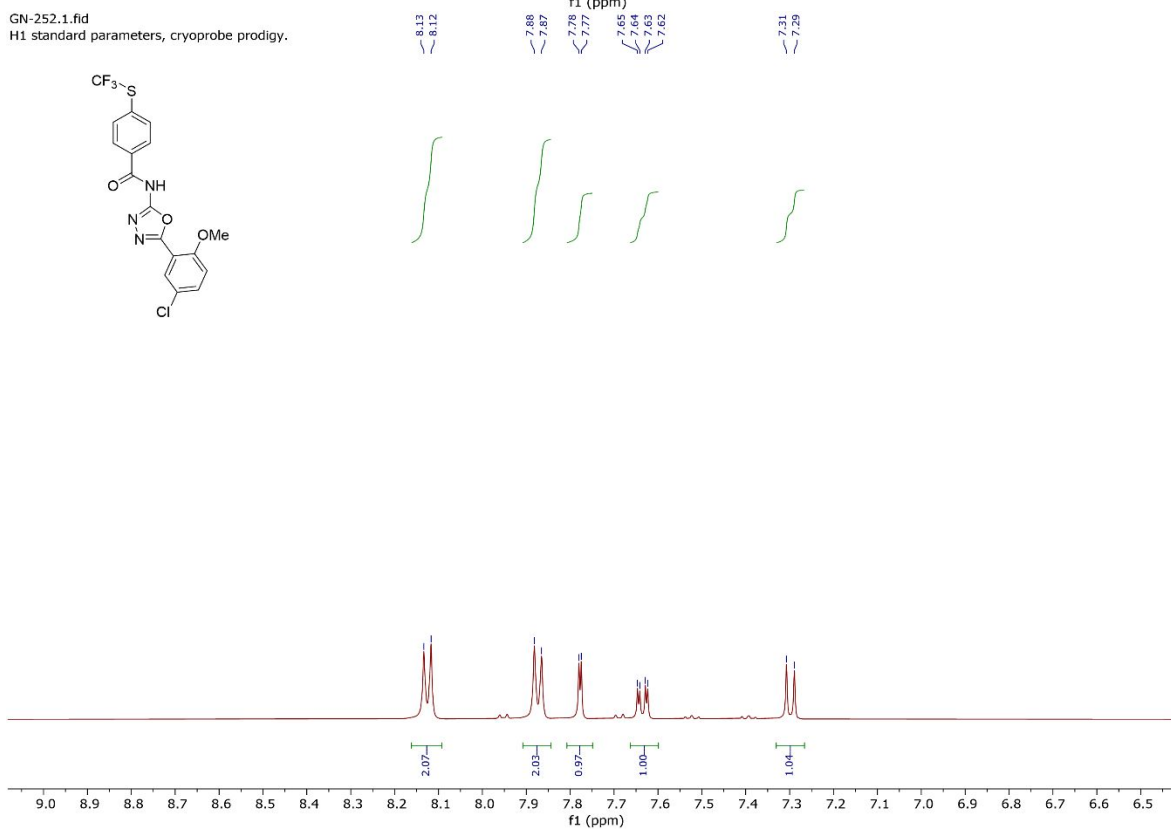

GN-252.1.fid  
H1 standard parameters, cryoprobe prodigy.

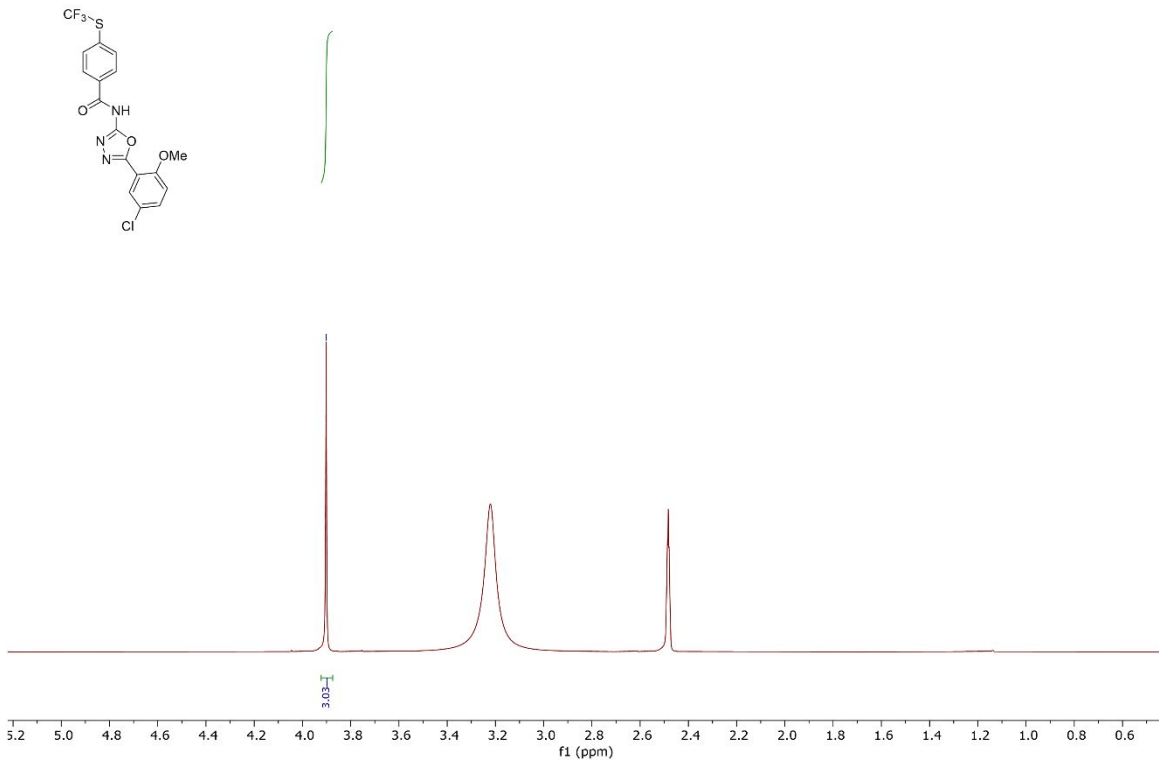

GN-252.2.fid  
C13 standard parameters, cryoprobe prodigy.

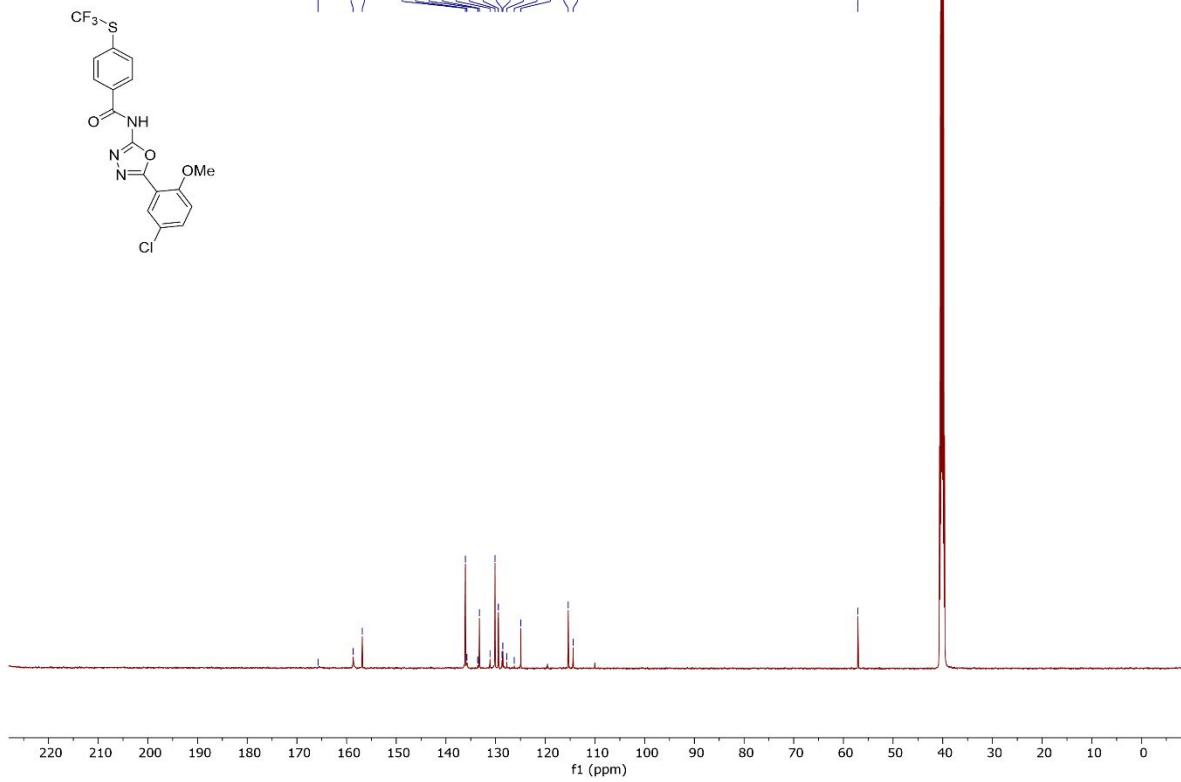

GN-252.3.fid  
F19 standard parameters, cryoprobe prodigy.  
DE is lengthened compared to default.

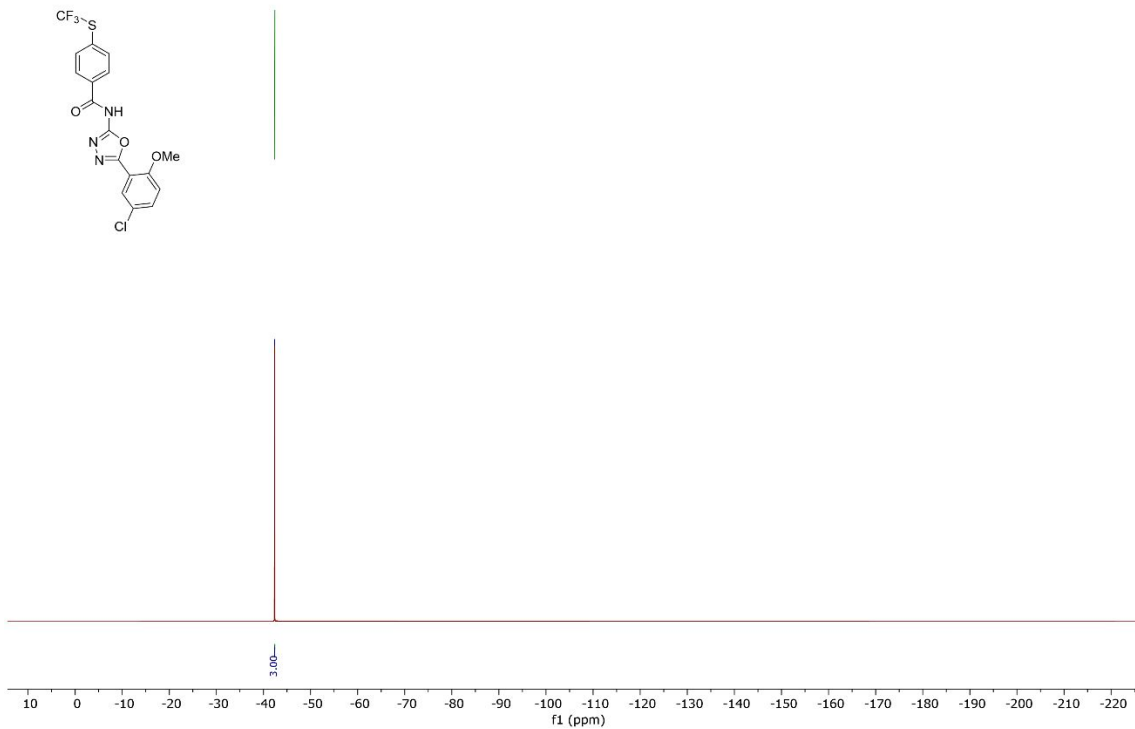

GN-213.2.fid  
H1 standard parameters, cryoprobe prodigy.

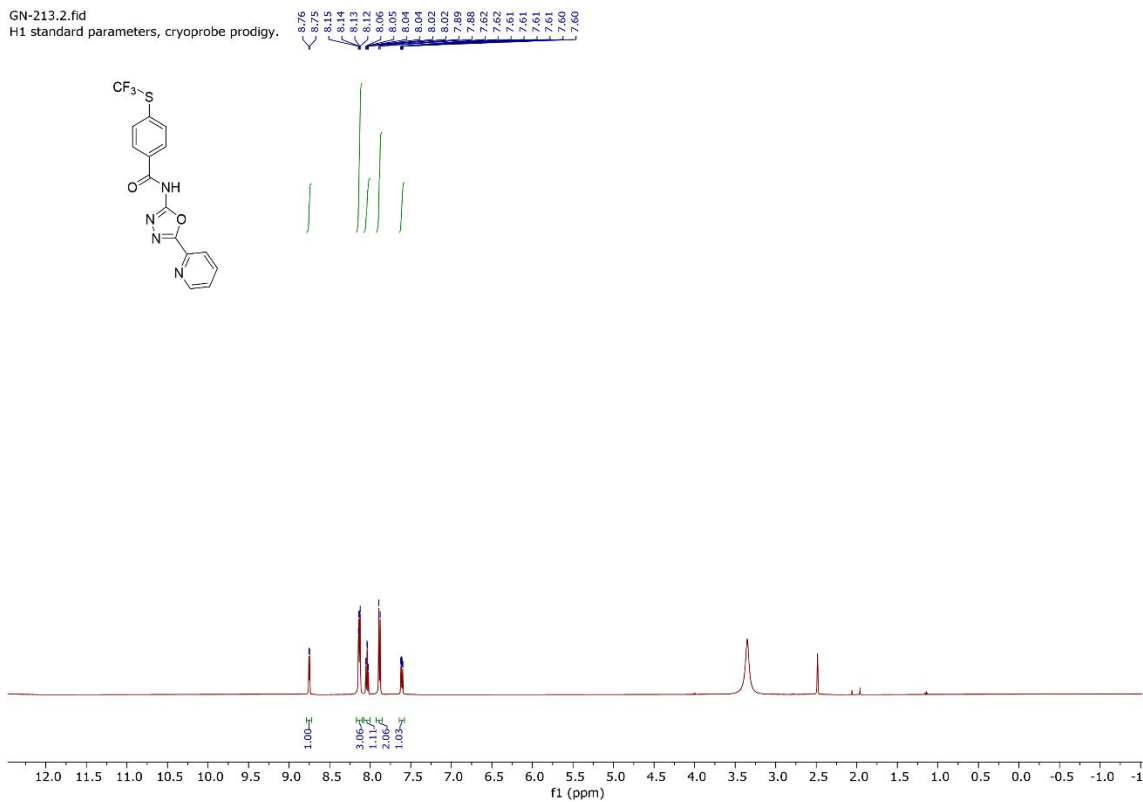

GN-213.2.fid  
H1 standard parameters, cryoprobe prodigy

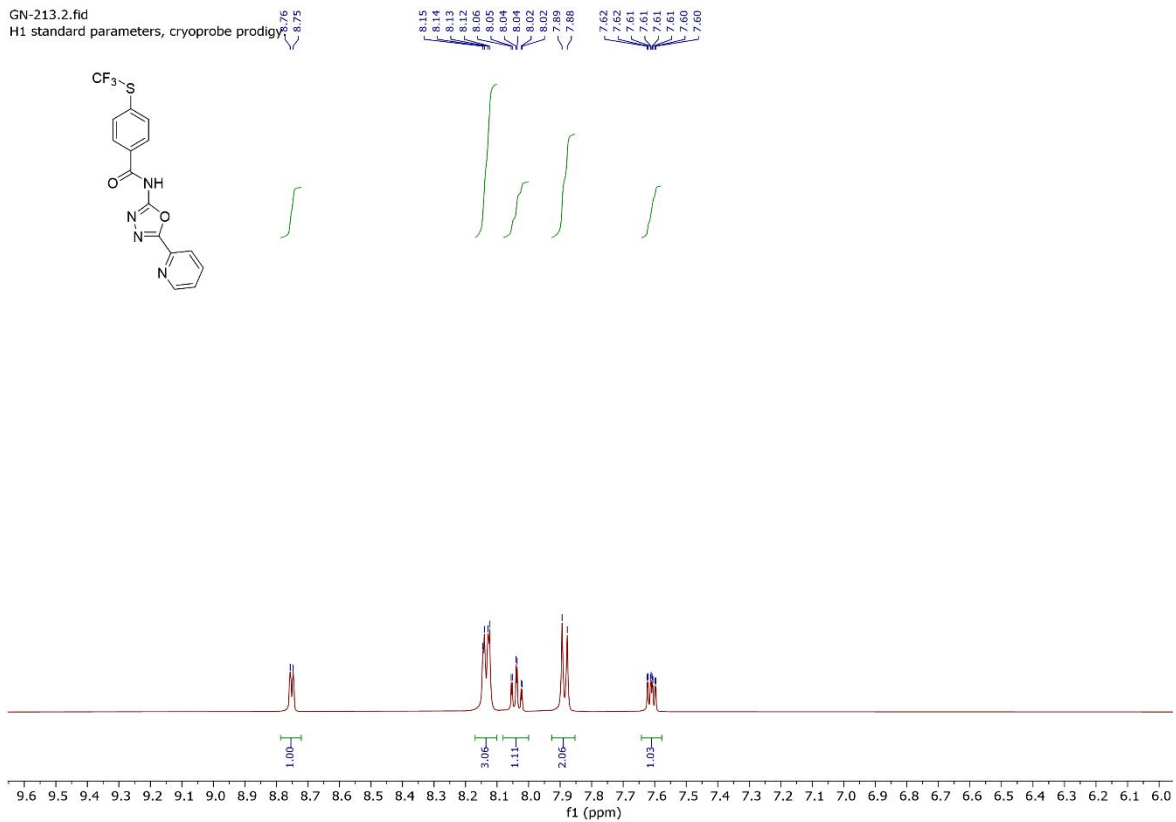

GN-213.1.fid  
C13 standard parameters, cryoprobe prodigy

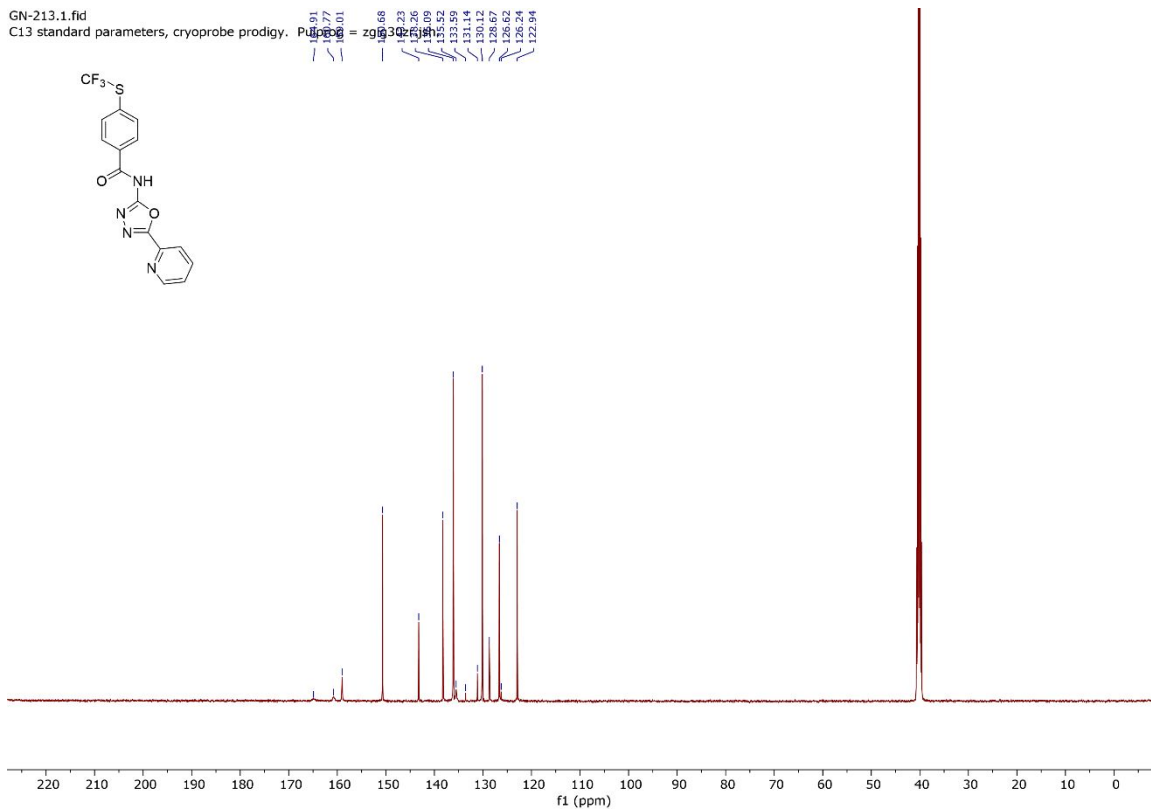

GN-213.3.fid  
F19 standard parameters, cryoprobe prodigy.  
DE is lengthened compared to default.

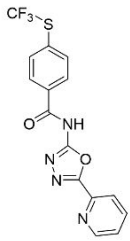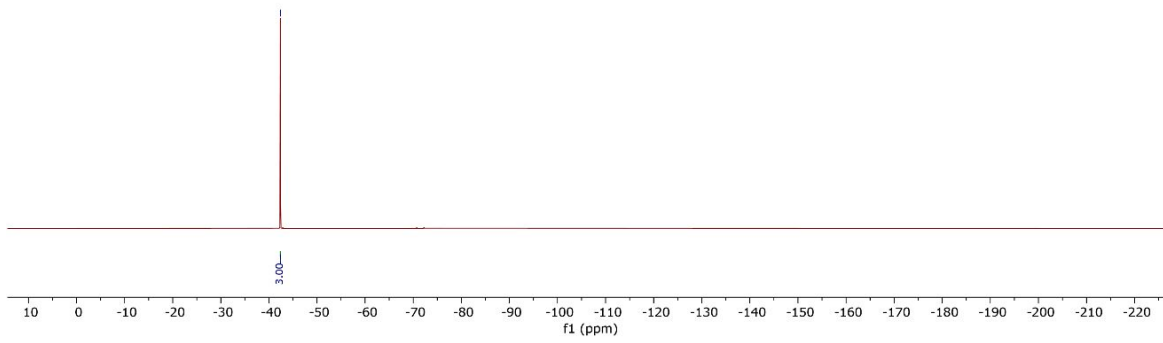

### III. HPLC Traces of Compounds 1 -17:

**Table 2S: HPLC Retention Times and Percent Purity for Compounds 1-17**

| <b>Compound</b> | <b>Retention Time (min)</b> | <b>Purity</b> |
|-----------------|-----------------------------|---------------|
| <b>1</b>        | 11.5                        | 96%           |
| <b>2</b>        | 11.2                        | 96%           |
| <b>3</b>        | 11.4                        | 96%           |
| <b>4</b>        | 12.9                        | 98%           |
| <b>5</b>        | 13.5                        | 96%           |
| <b>6</b>        | 13.0                        | 98%           |
| <b>7</b>        | 13.0                        | 98%           |
| <b>8</b>        | 12.3                        | 96%           |
| <b>9</b>        | 13.4                        | 97%           |
| <b>10</b>       | 13.3                        | 99%           |
| <b>11</b>       | 12.9                        | 99%           |
| <b>12</b>       | 12.9                        | 98%           |
| <b>13</b>       | 14.3                        | 97%           |
| <b>14</b>       | 13.5                        | 99%           |
| <b>HSGN-218</b> | 14.2                        | 99%           |
| <b>16</b>       | 13.1                        | 97%           |
| <b>17</b>       | 10.3                        | 98%           |



**HPLC Trace at 260 nm for *N*-(5-phenyl-1,3,4-oxadiazol-2-yl)-4-((trifluoromethyl)thio)benzamide (1):**

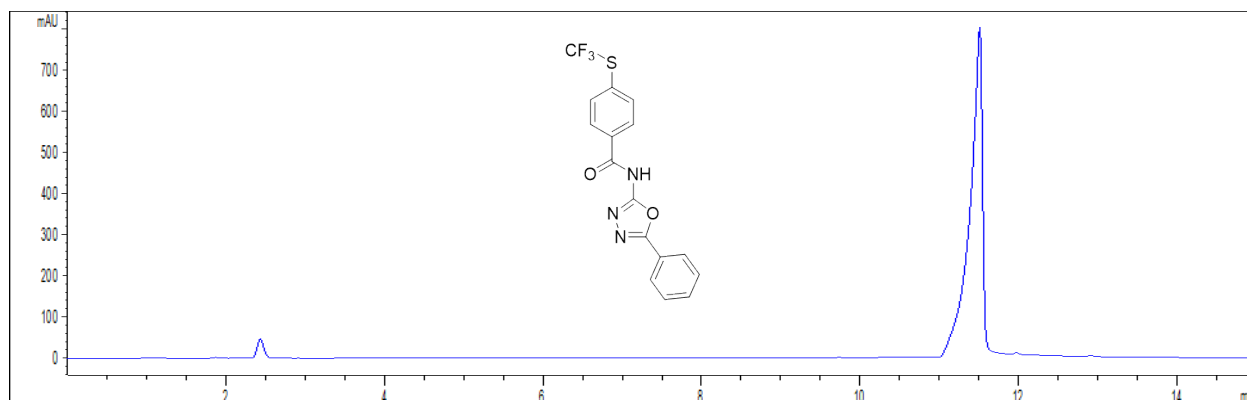

**HPLC Trace at 260 nm for *N*-(5-(2-fluorophenyl)-1,3,4-oxadiazol-2-yl)-4-((trifluoromethyl)thio)benzamide (2):**

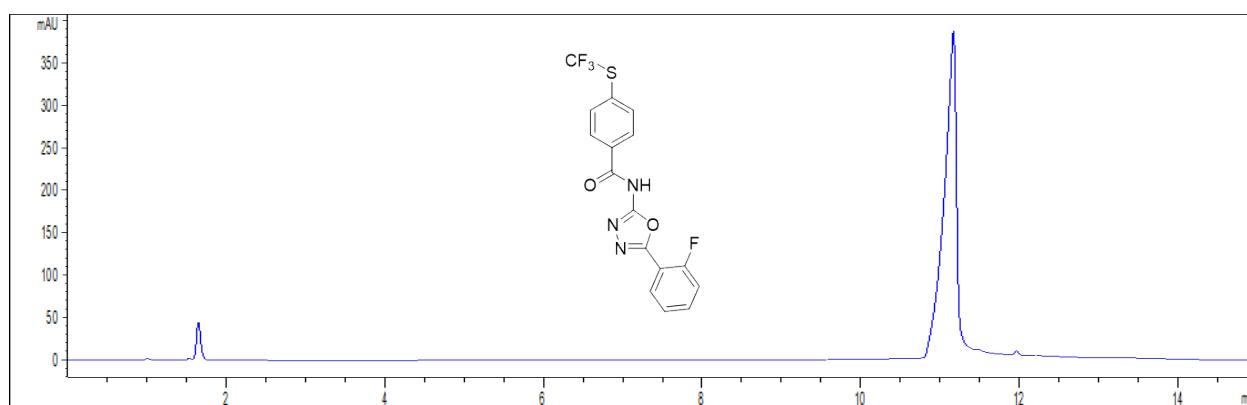

**HPLC Trace at 260 nm for *N*-(5-(2-chlorophenyl)-1,3,4-oxadiazol-2-yl)-4-((trifluoromethyl)thio)benzamide (3):**

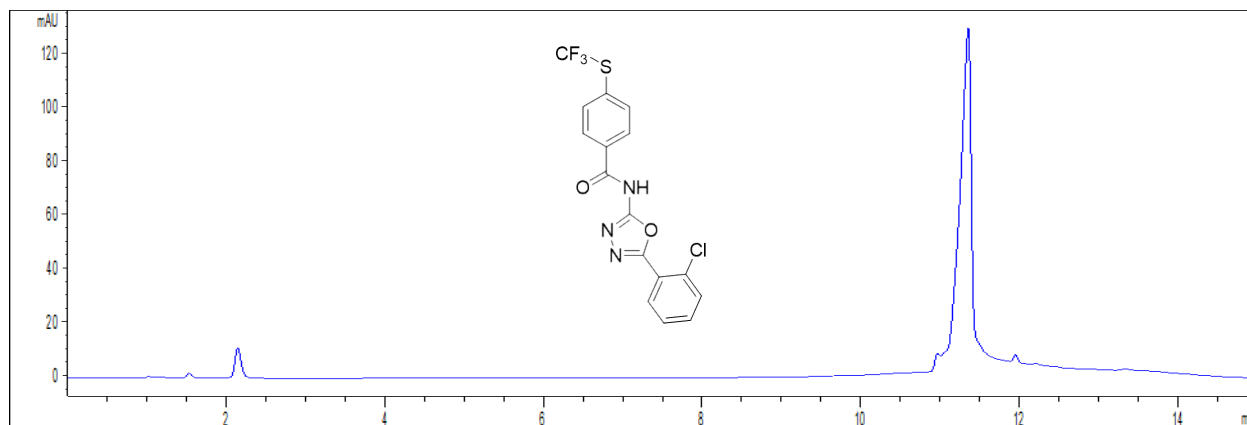

**HPLC Trace at 260 nm for *N*-(5-(3-fluorophenyl)-1,3,4-oxadiazol-2-yl)-4-((trifluoromethyl)thio)benzamide (4):**

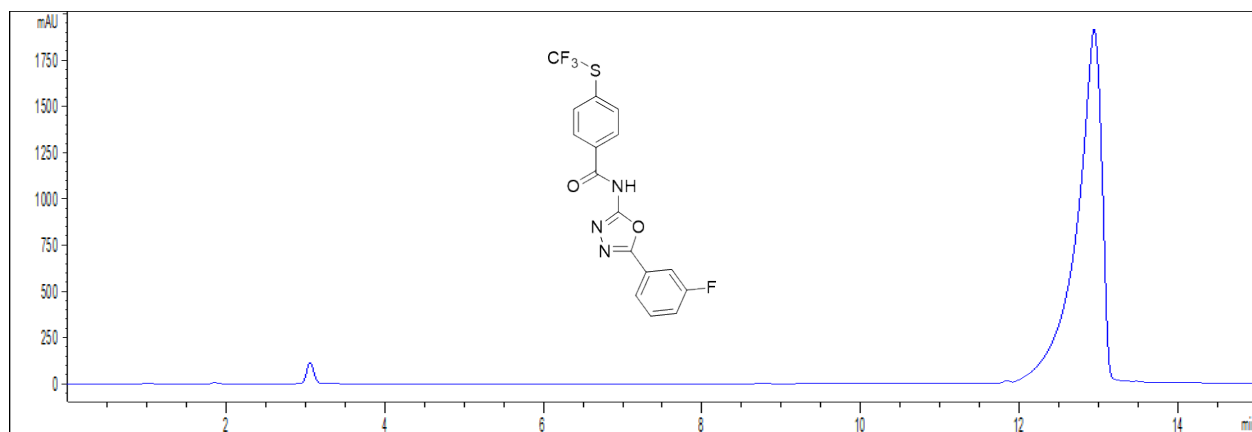

**HPLC Trace at 260 nm for *N*-(5-(3-chlorophenyl)-1,3,4-oxadiazol-2-yl)-4-((trifluoromethyl)thio)benzamide (5):**

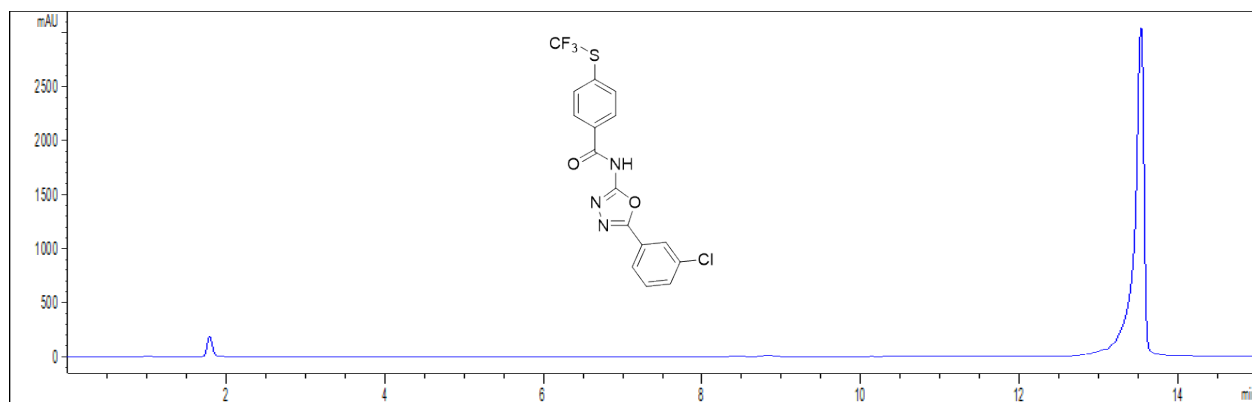

**HPLC Trace at 260 nm for *N*-(5-(3-methoxyphenyl)-1,3,4-oxadiazol-2-yl)-4-((trifluoromethyl)thio)benzamide (6):**

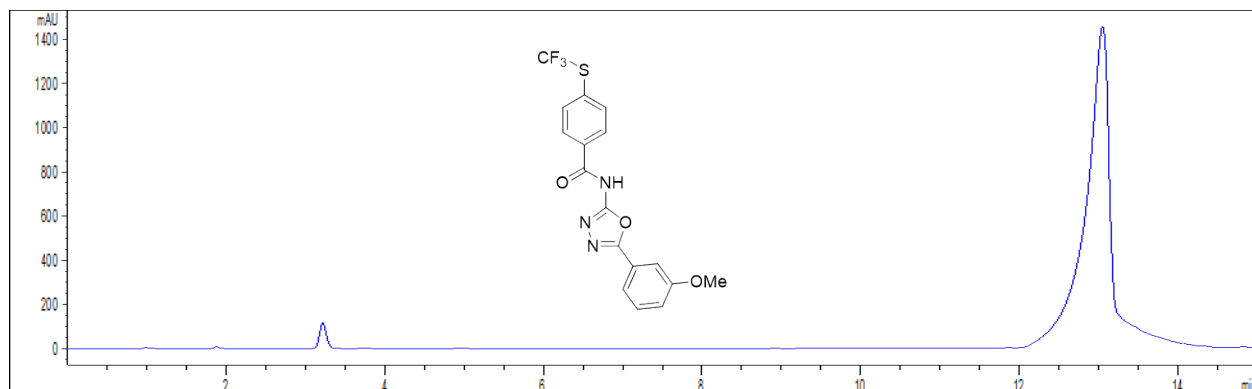

**HPLC Trace at 260 nm for *N*-(5-(3-trifluoromethylphenyl)-1,3,4-oxadiazol-2-yl)-4-((trifluoromethyl)thio)benzamide (7):**

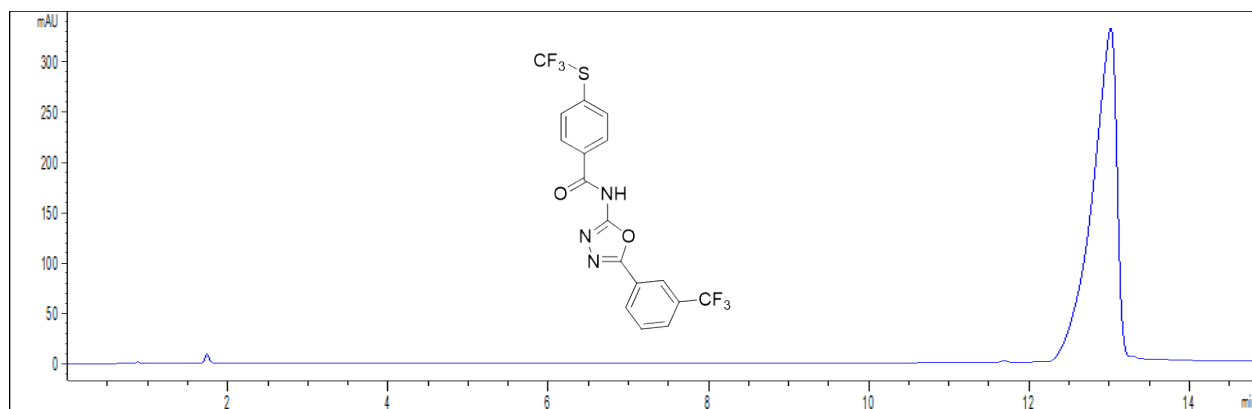

**HPLC Trace at 260 nm for *N*-(5-(4-fluorophenyl)-1,3,4-oxadiazol-2-yl)-4-((trifluoromethyl)thio)benzamide (8):**

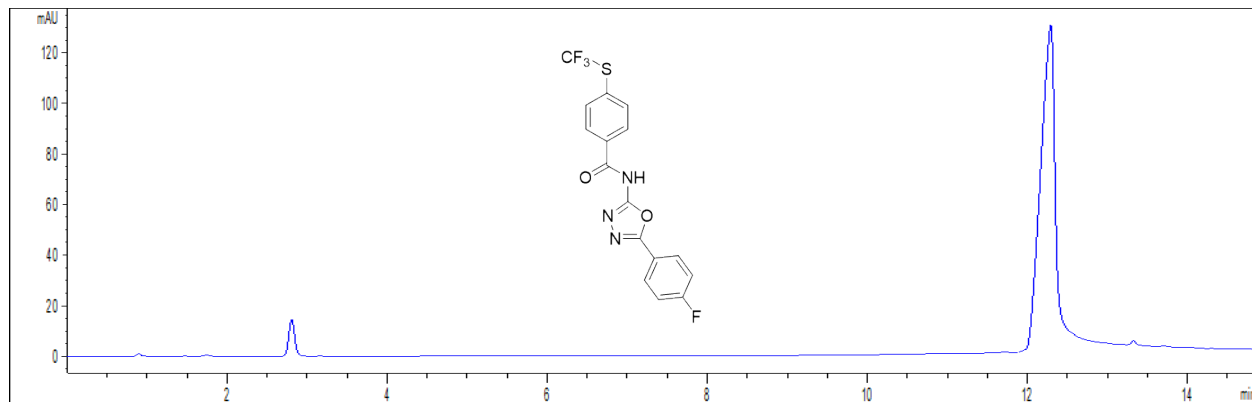

**HPLC Trace at 260 nm for *N*-(5-(4-chlorophenyl)-1,3,4-oxadiazol-2-yl)-4-((trifluoromethyl)thio)benzamide (9):**

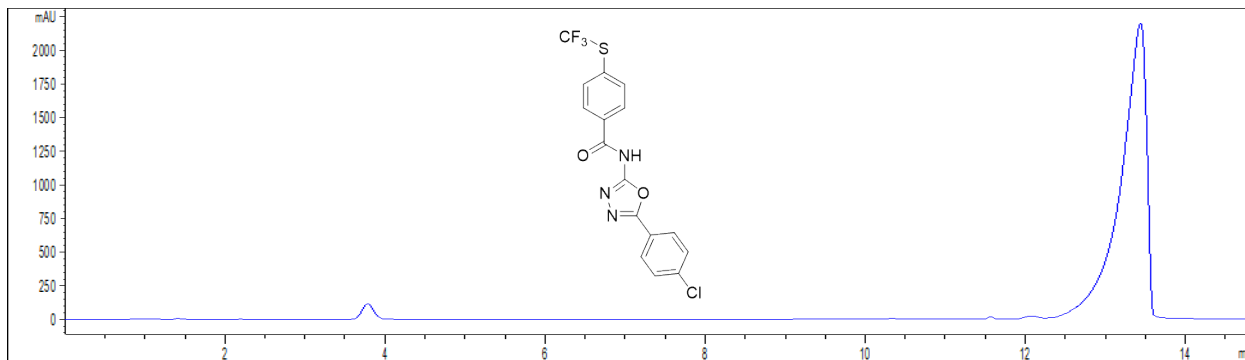

**HPLC Trace at 260 nm for *N*-(5-(4-trifluoromethylphenyl)-1,3,4-oxadiazol-2-yl)-4-((trifluoromethyl)thio)benzamide (10):**

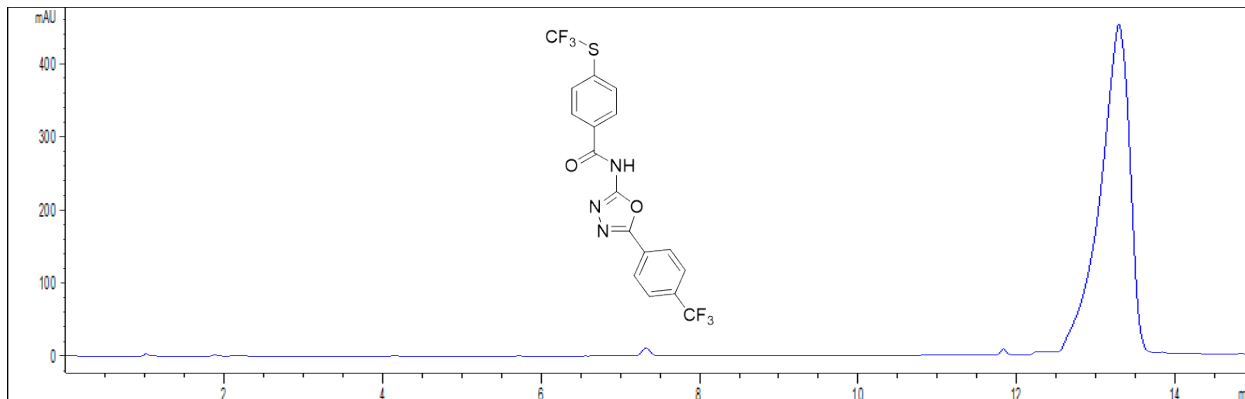

**HPLC Trace at 260 nm for *N*-(5-(4-methoxyphenyl)-1,3,4-oxadiazol-2-yl)-4-((trifluoromethyl)thio)benzamide (11):**

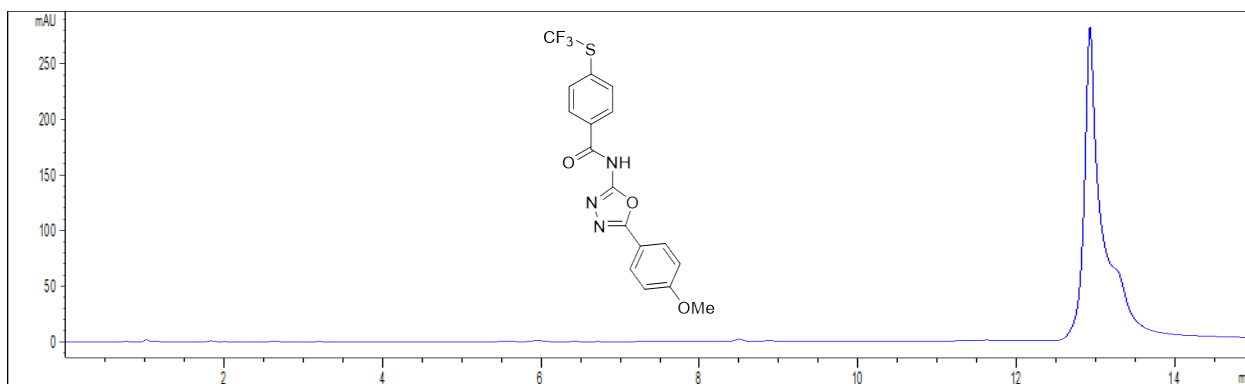

**HPLC Trace at 260 nm for *N*-(5-(4-methylphenyl)-1,3,4-oxadiazol-2-yl)-4-((trifluoromethyl)thio)benzamide (12):**

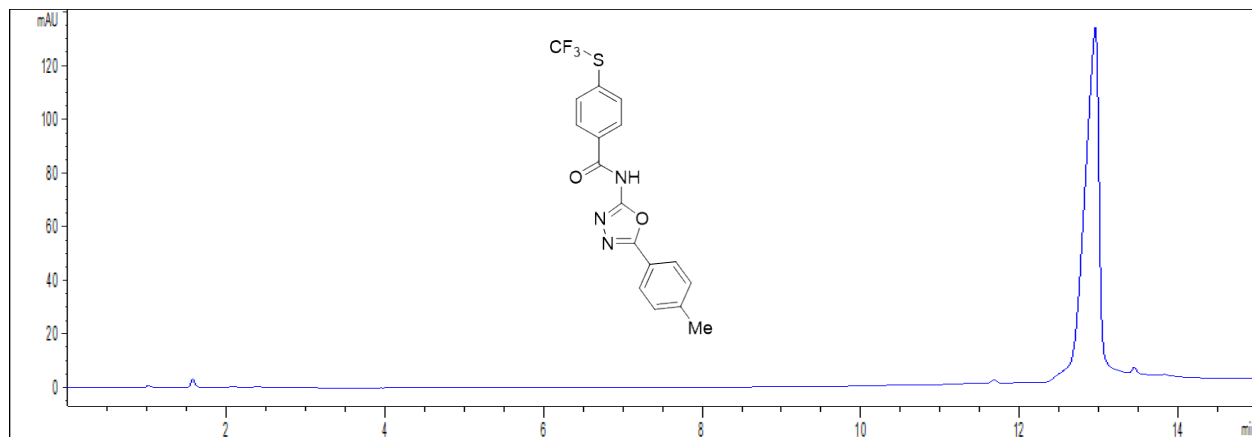

**HPLC Trace at 260 nm for *N*-(5-(4-isopropylphenyl)-1,3,4-oxadiazol-2-yl)-4-((trifluoromethyl)thio)benzamide (13):**

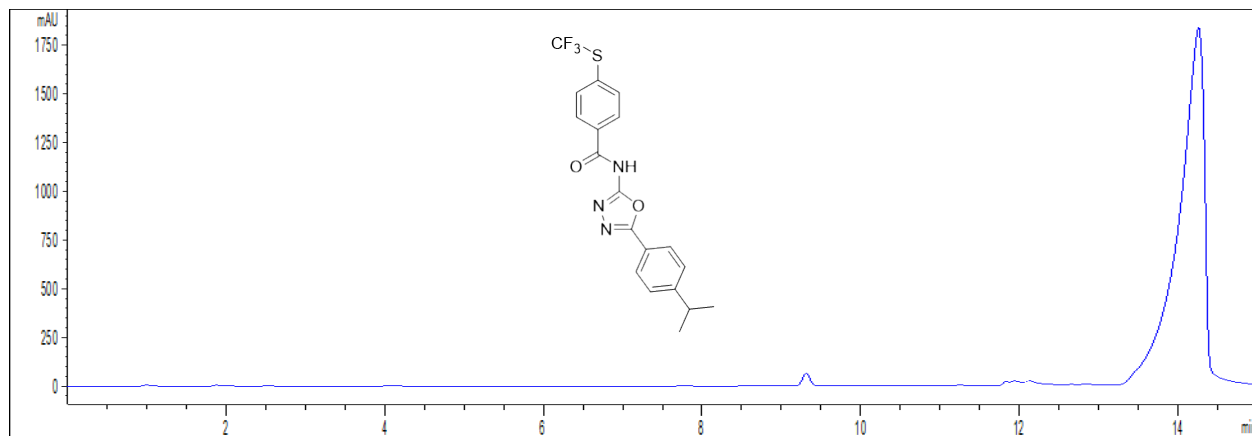

**HPLC Trace at 260 nm for *N*-(5-(2,4-dichlorophenyl)-1,3,4-oxadiazol-2-yl)-4-((trifluoromethyl)thio)benzamide (14):**

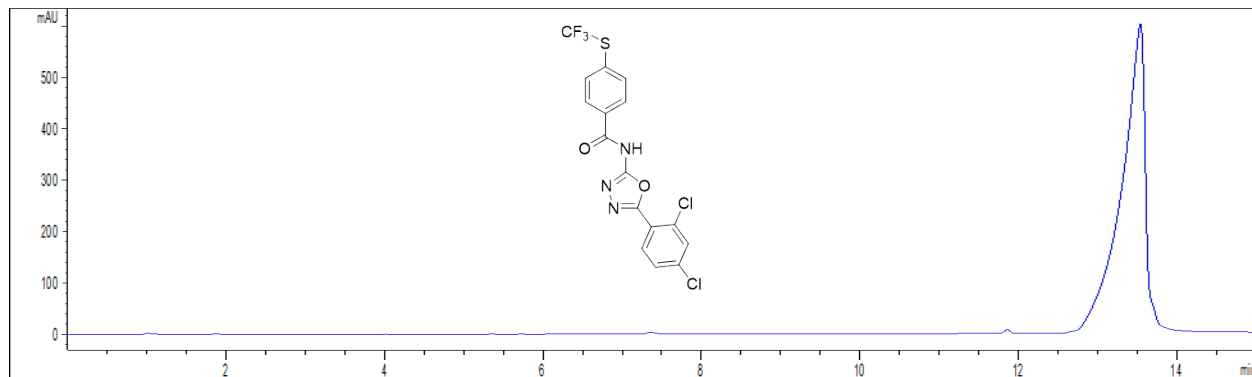

**HPLC Trace at 260 nm for *N*-(5-(3,5-dichlorophenyl)-1,3,4-oxadiazol-2-yl)-4-((trifluoromethyl)thio)benzamide (HSGN-218):**

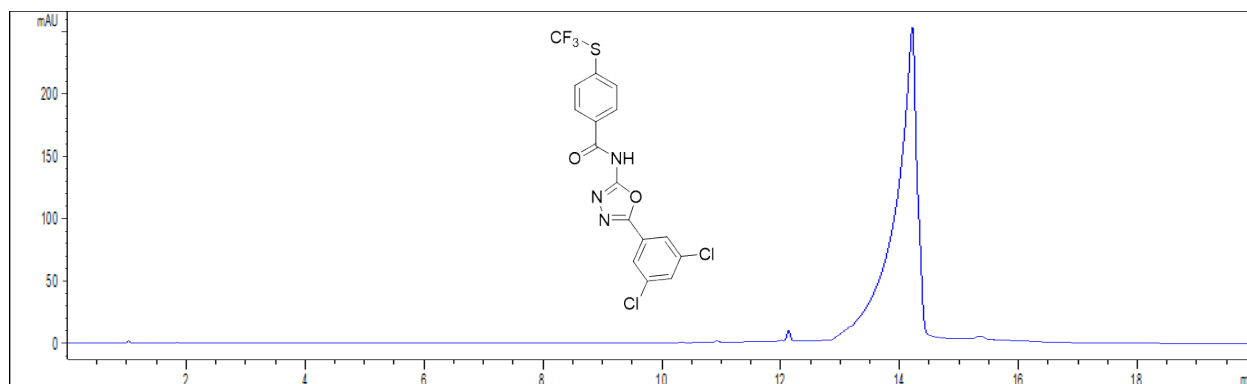

**HPLC Trace at 260 nm for *N*-(5-(5-chloro-2-methoxyphenyl)-1,3,4-oxadiazol-2-yl)-4-((trifluoromethyl)thio)benzamide (16):**

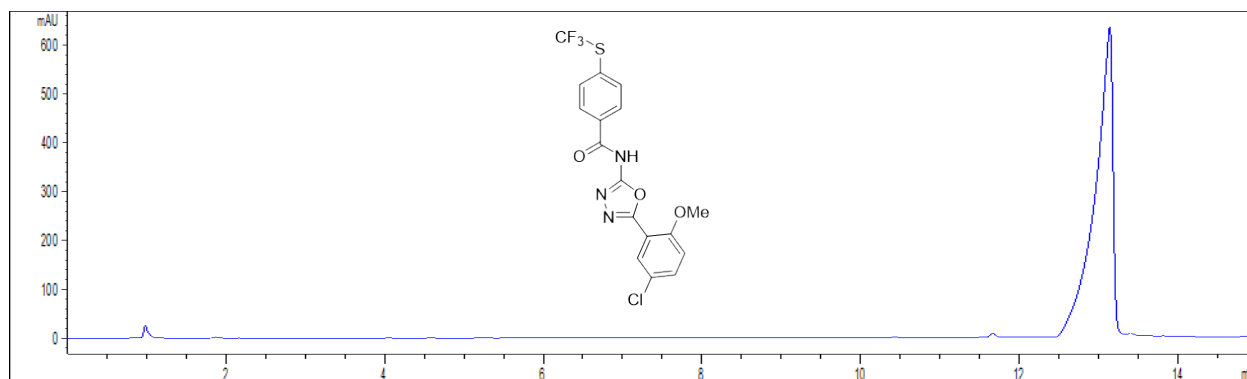

**HPLC Trace at 260 nm for *N*-(5-(pyridin-2-yl)-1,3,4-oxadiazol-2-yl)-4-((trifluoromethyl)thio)benzamide (17):**

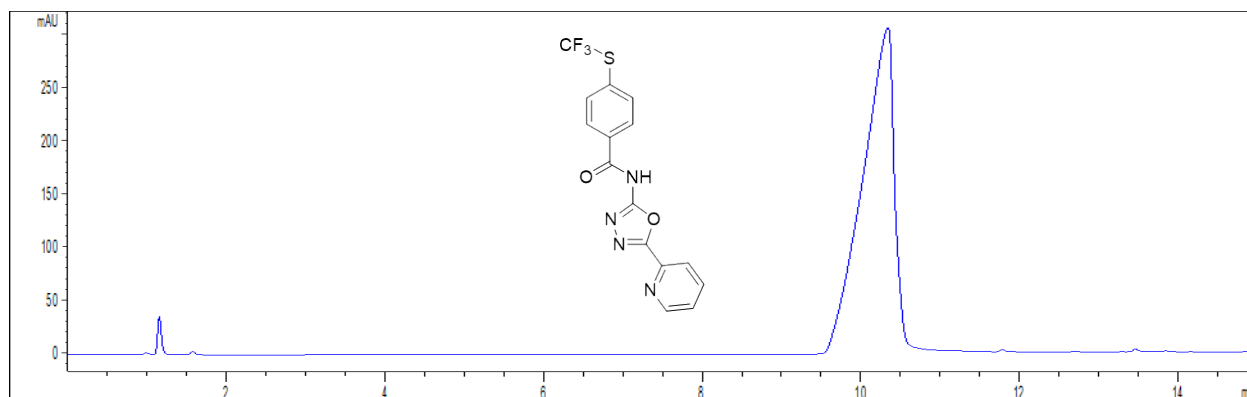

Supplement: NIHMS1667791-supplement-Supplementary_Material.pdf [file NIHMS1667791-supplement-Supplementary_Material.pdf]
